# Supplementary material for: Sequential one-pot synthesis of N-sulfonyl spiroaziridine oxindoles from spiroepoxy oxindoles
Source: Royal Society of Chemistry journal article supplement (doi:10.1039/d1ob00541c), 2021-01-01
Supplement: d1ob00541c1.pdf [file d1ob00541c1.pdf]

## Electronic Supplementary Information

### Sequential one-pot synthesis of N-sulfonyl spiroaziridine oxindoles from spiroepoxy oxindoles

Anurag Biswas,<sup>a, b</sup> SK Abu Saleh,<sup>a</sup> Atanu Hazra,<sup>a</sup> Subhas Chandra Debnath<sup>b</sup> and Saumen Hajra<sup>\*a</sup>

<sup>a</sup>Centre of Biomedical Research, Sanjay Gandhi Post-Graduate Institute of Medical Sciences Campus, Raebareli Road, Lucknow 226014, Uttar Pradesh, India

<sup>b</sup>University of Kalyani, Kalyani 741235, Nadia, West Bengal, India

#### List of contents

<sup>1</sup>H and <sup>13</sup>C NMR spectra of spiroaziridine oxindoles **1** S2-S47

<sup>1</sup>H and <sup>13</sup>C NMR spectra of compound **5a** S48-S49

$^1\text{H}$  and  $^{13}\text{C}$  NMR spectra of spiro-aziridine Oxindoles **1**:

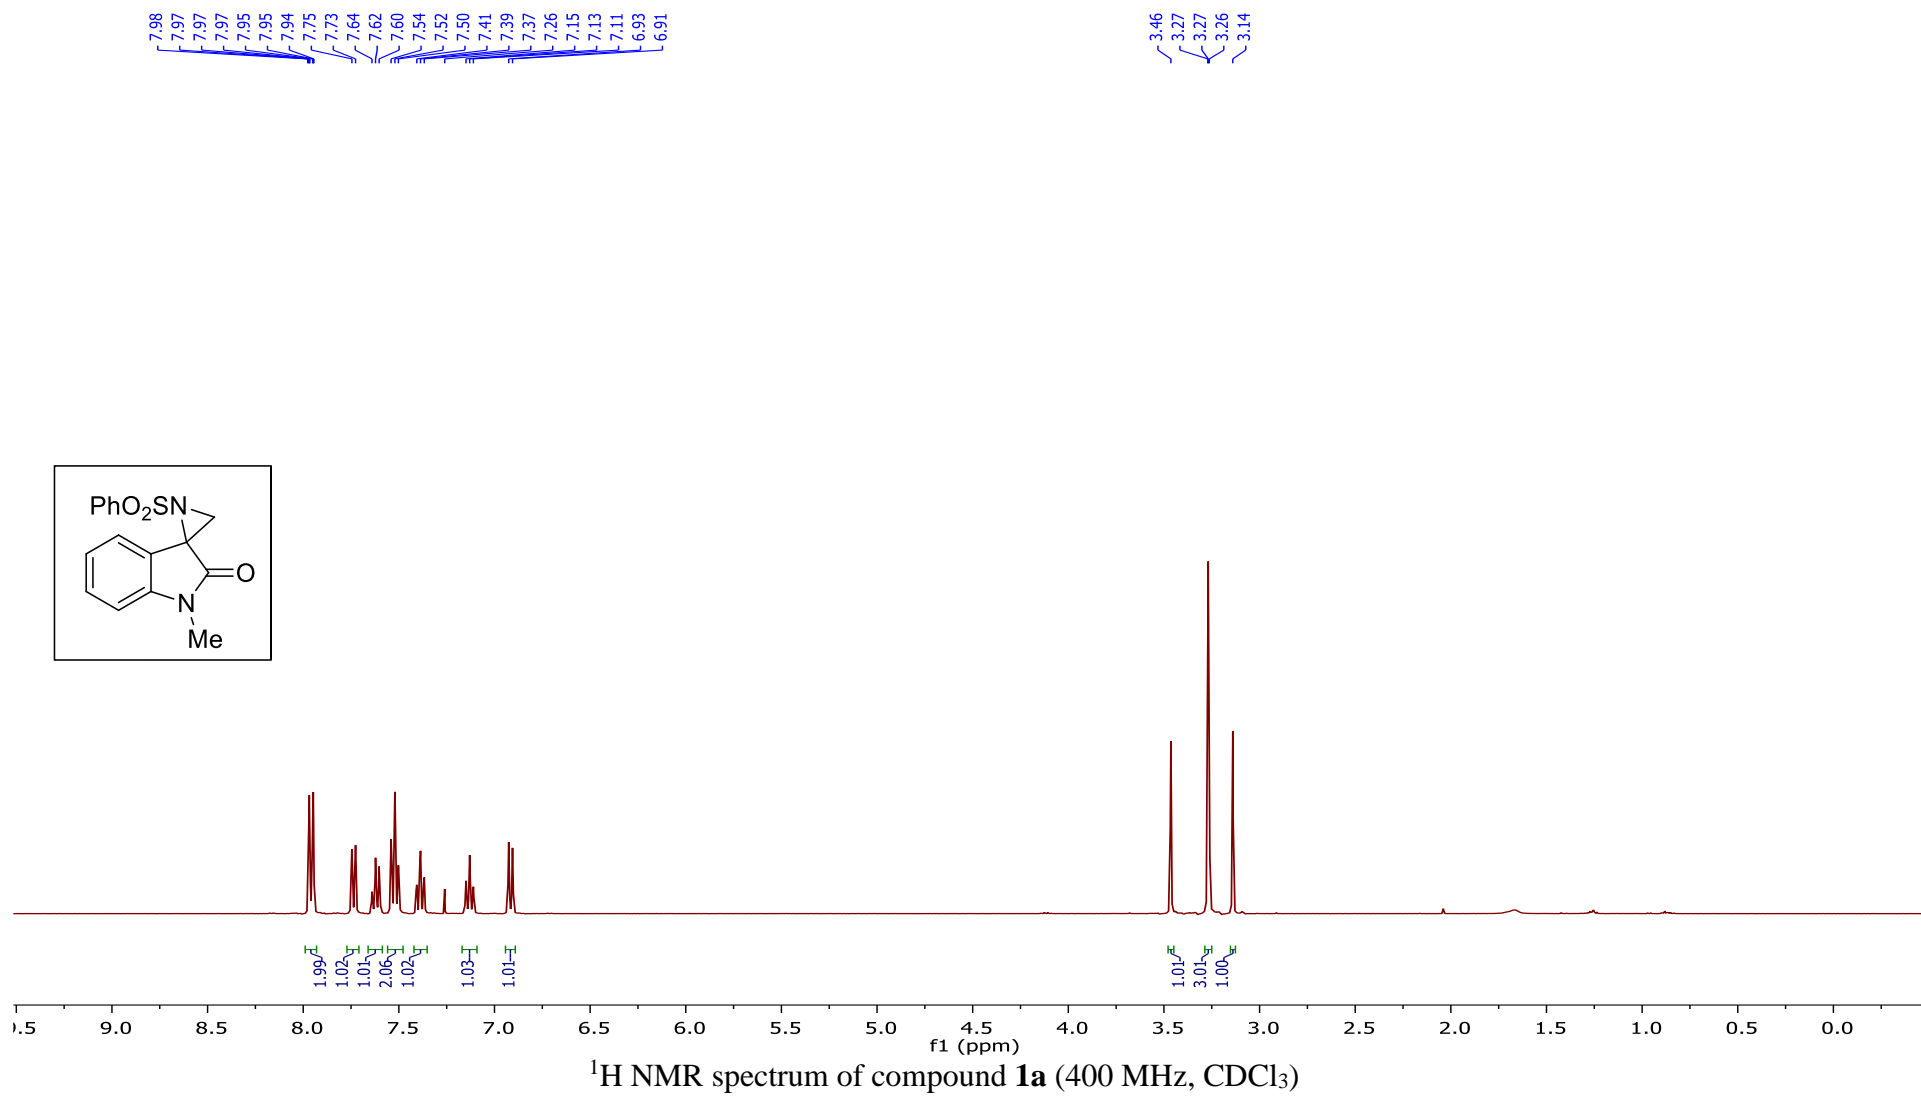

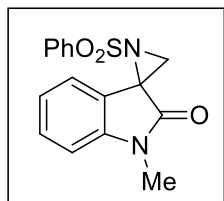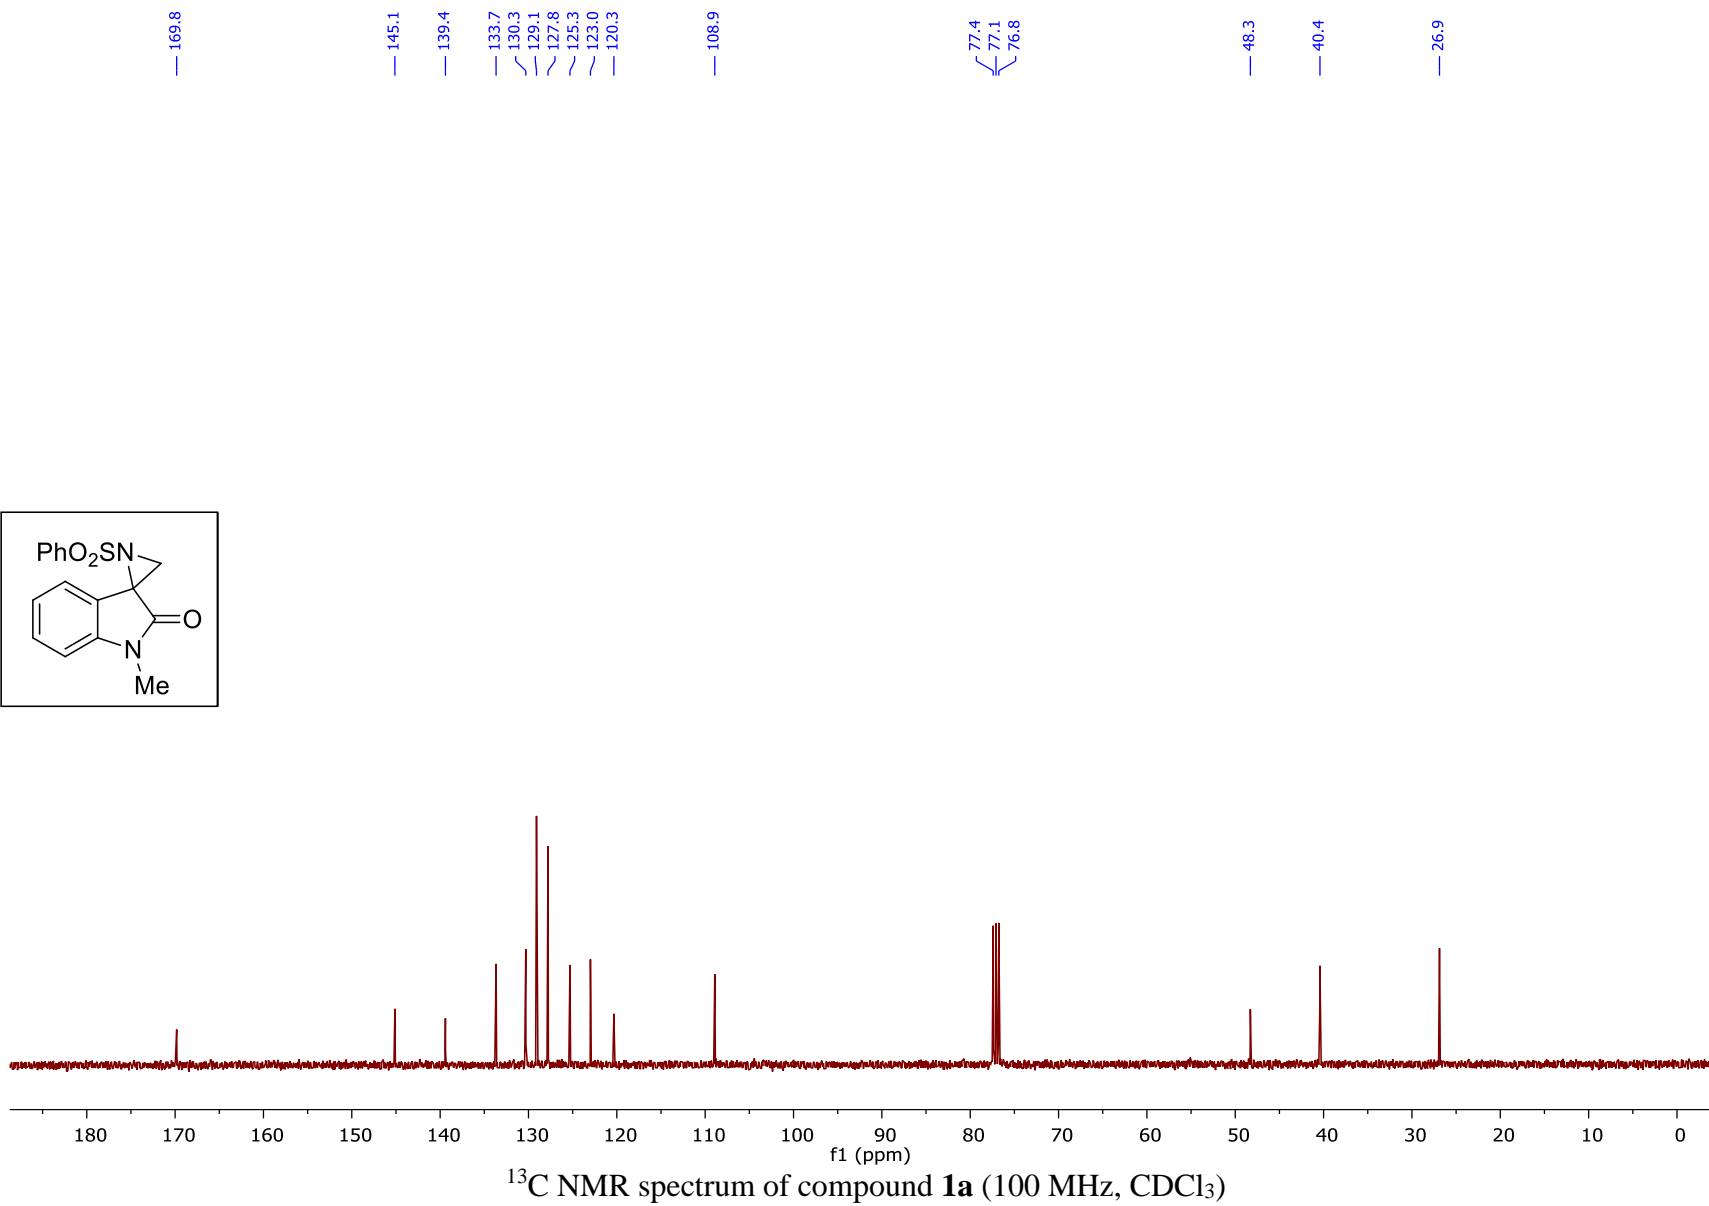

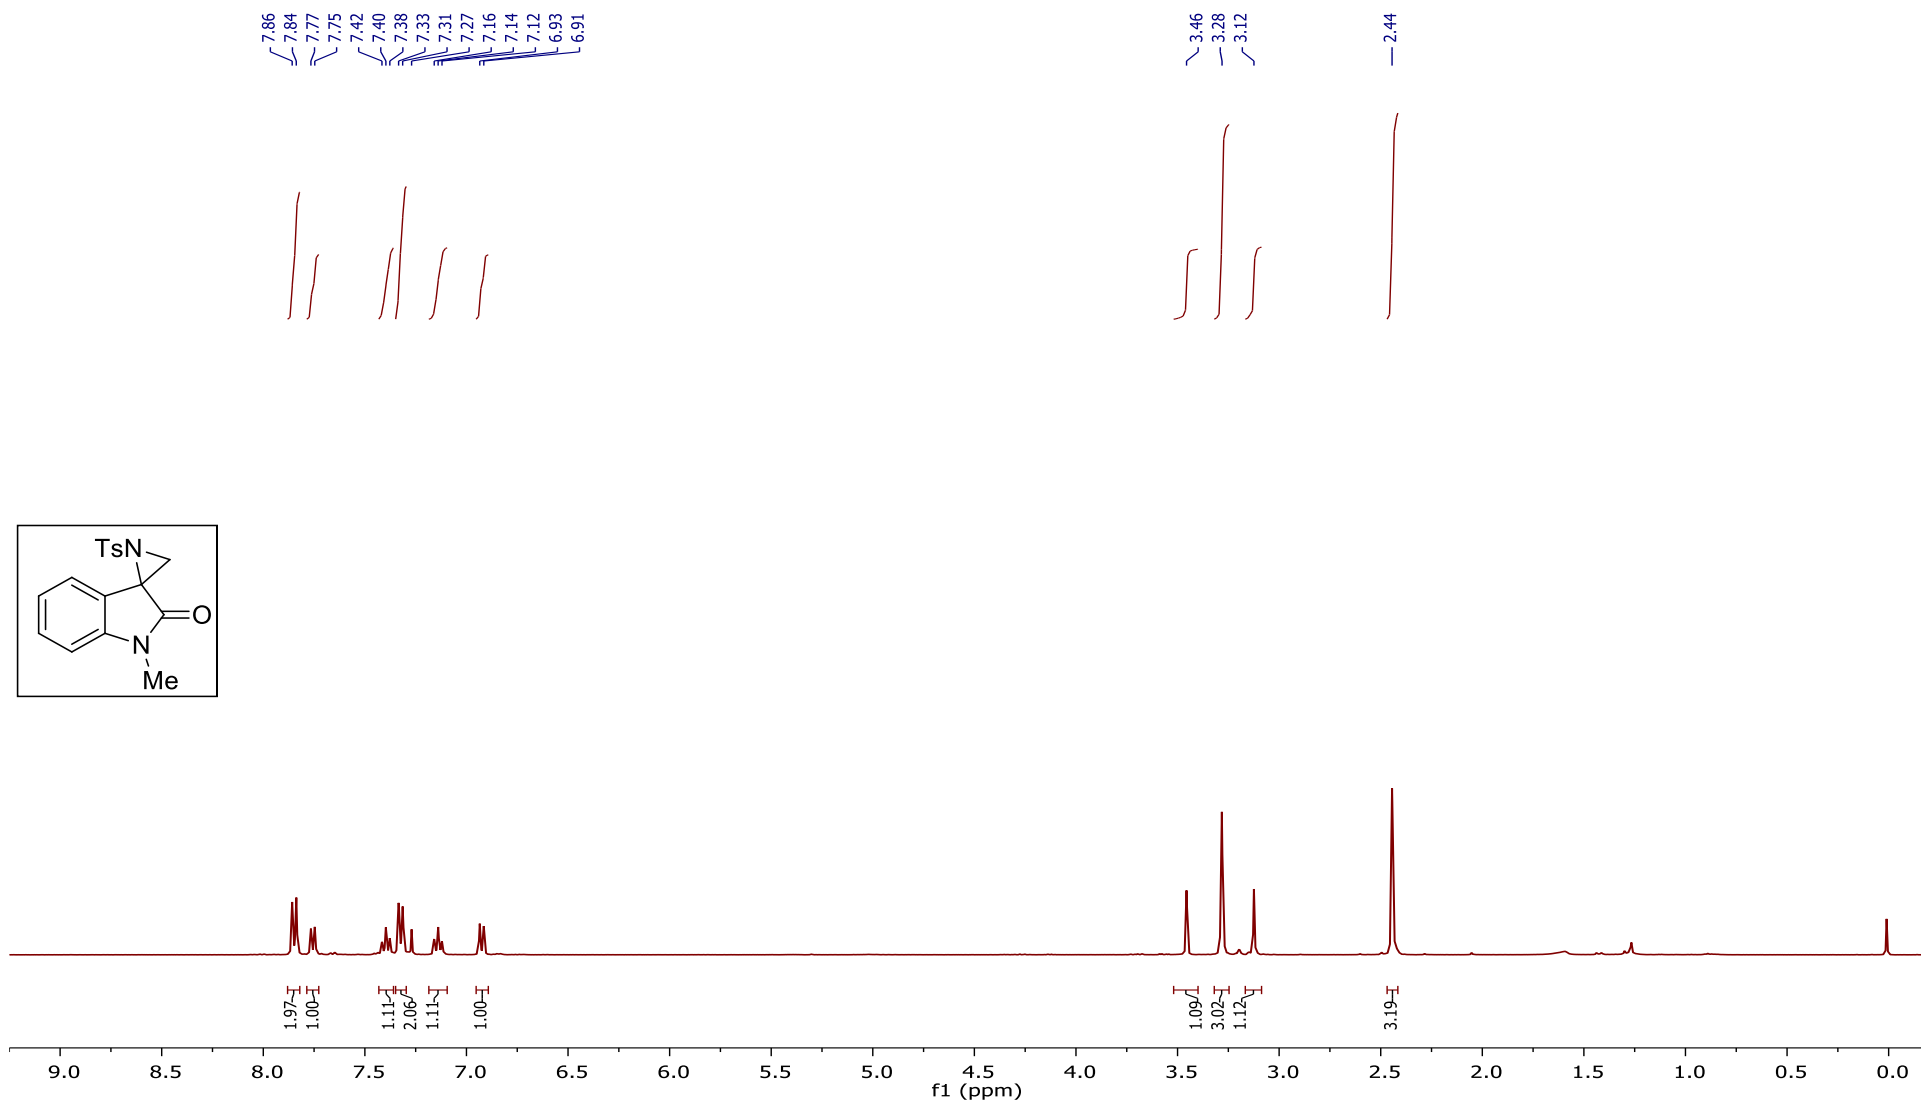

<sup>1</sup>H NMR spectrum of compound **1b** (400 MHz, CDCl<sub>3</sub>)

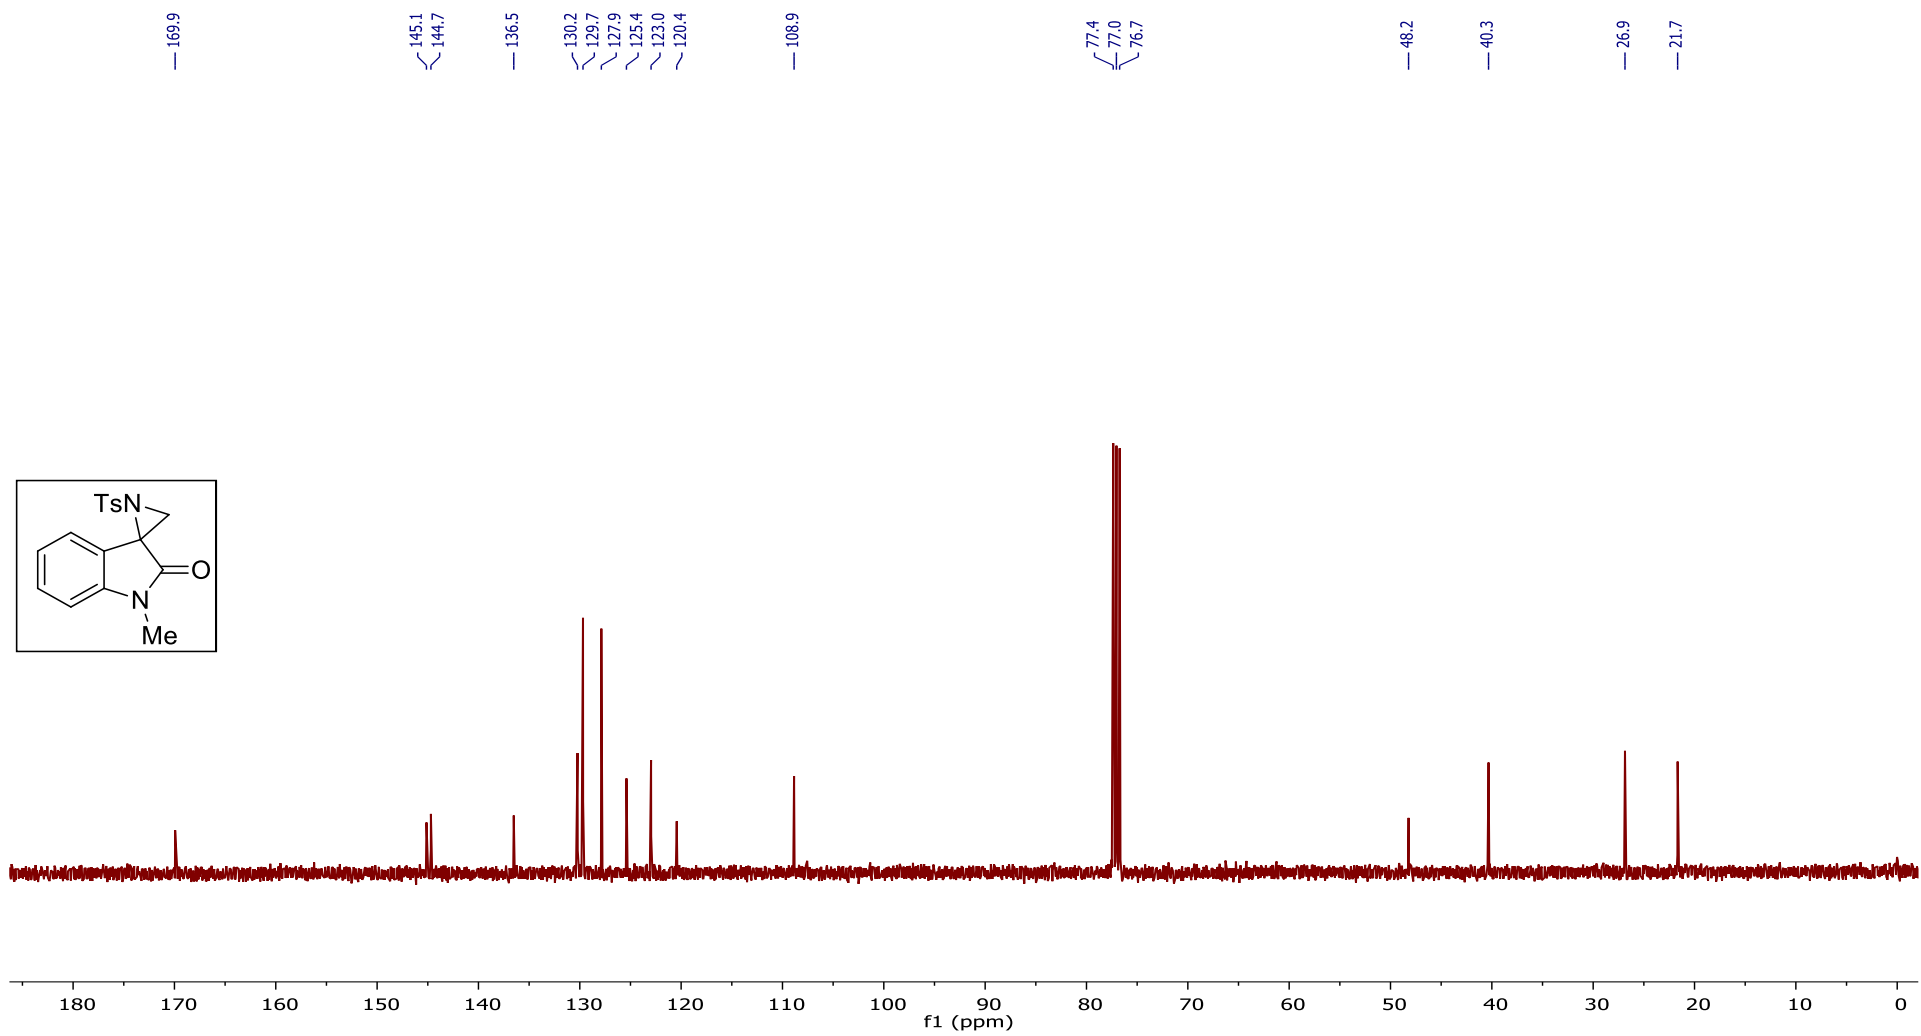

$^{13}\text{C}$  NMR spectrum of compound **1b** (100 MHz,  $\text{CDCl}_3$ )

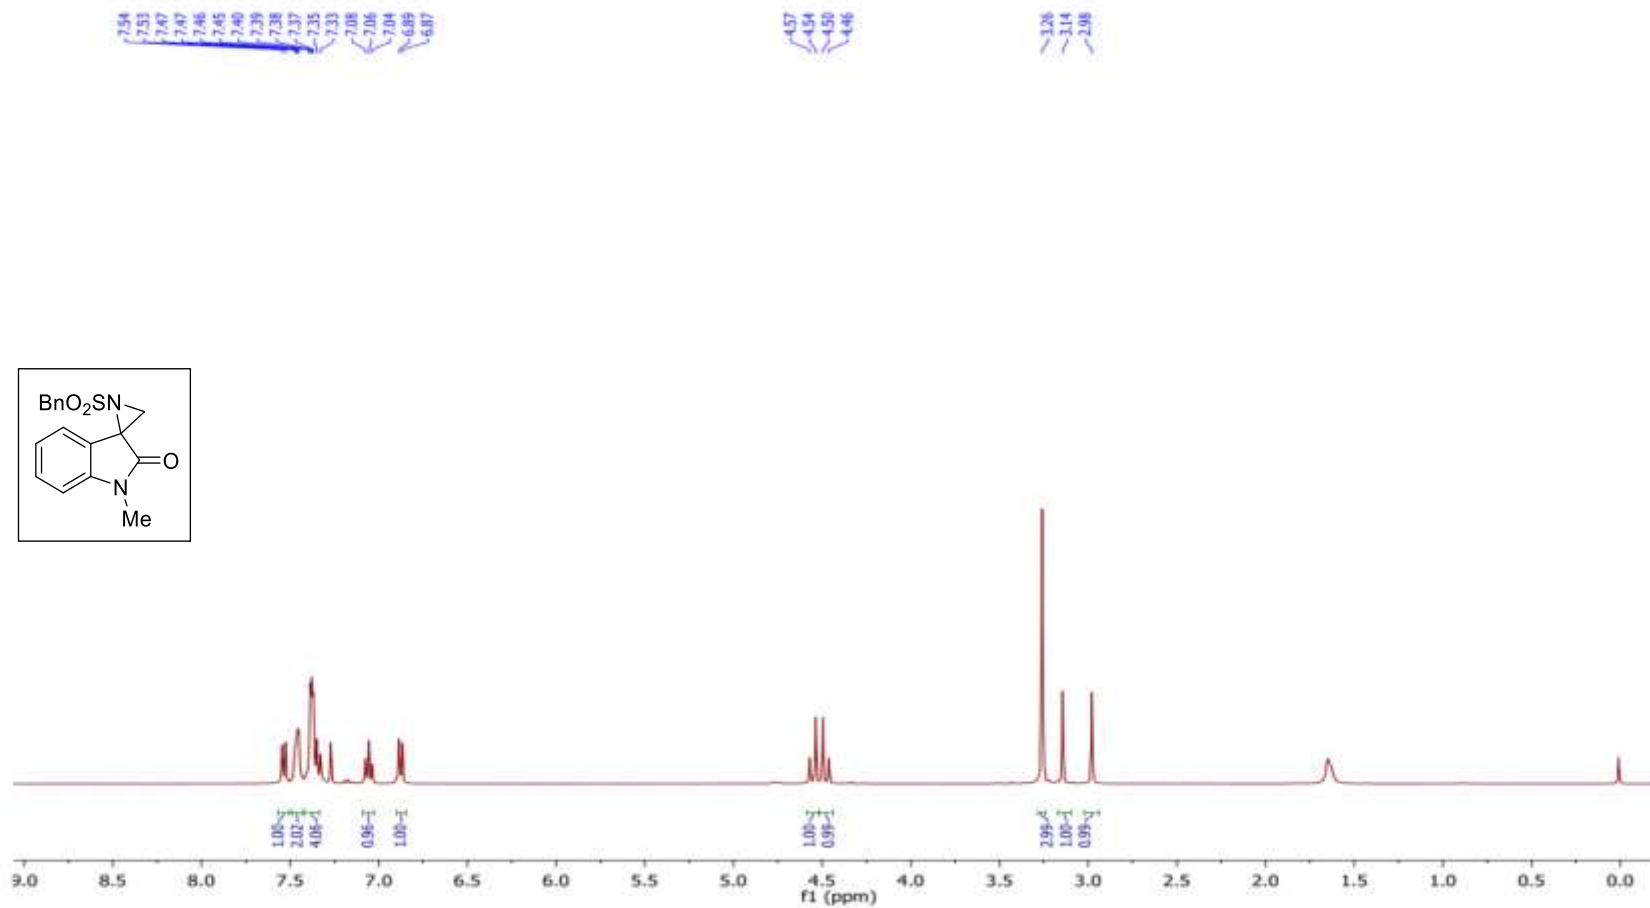

<sup>1</sup>H NMR spectrum of compound **1c** (400 MHz, CDCl<sub>3</sub>)

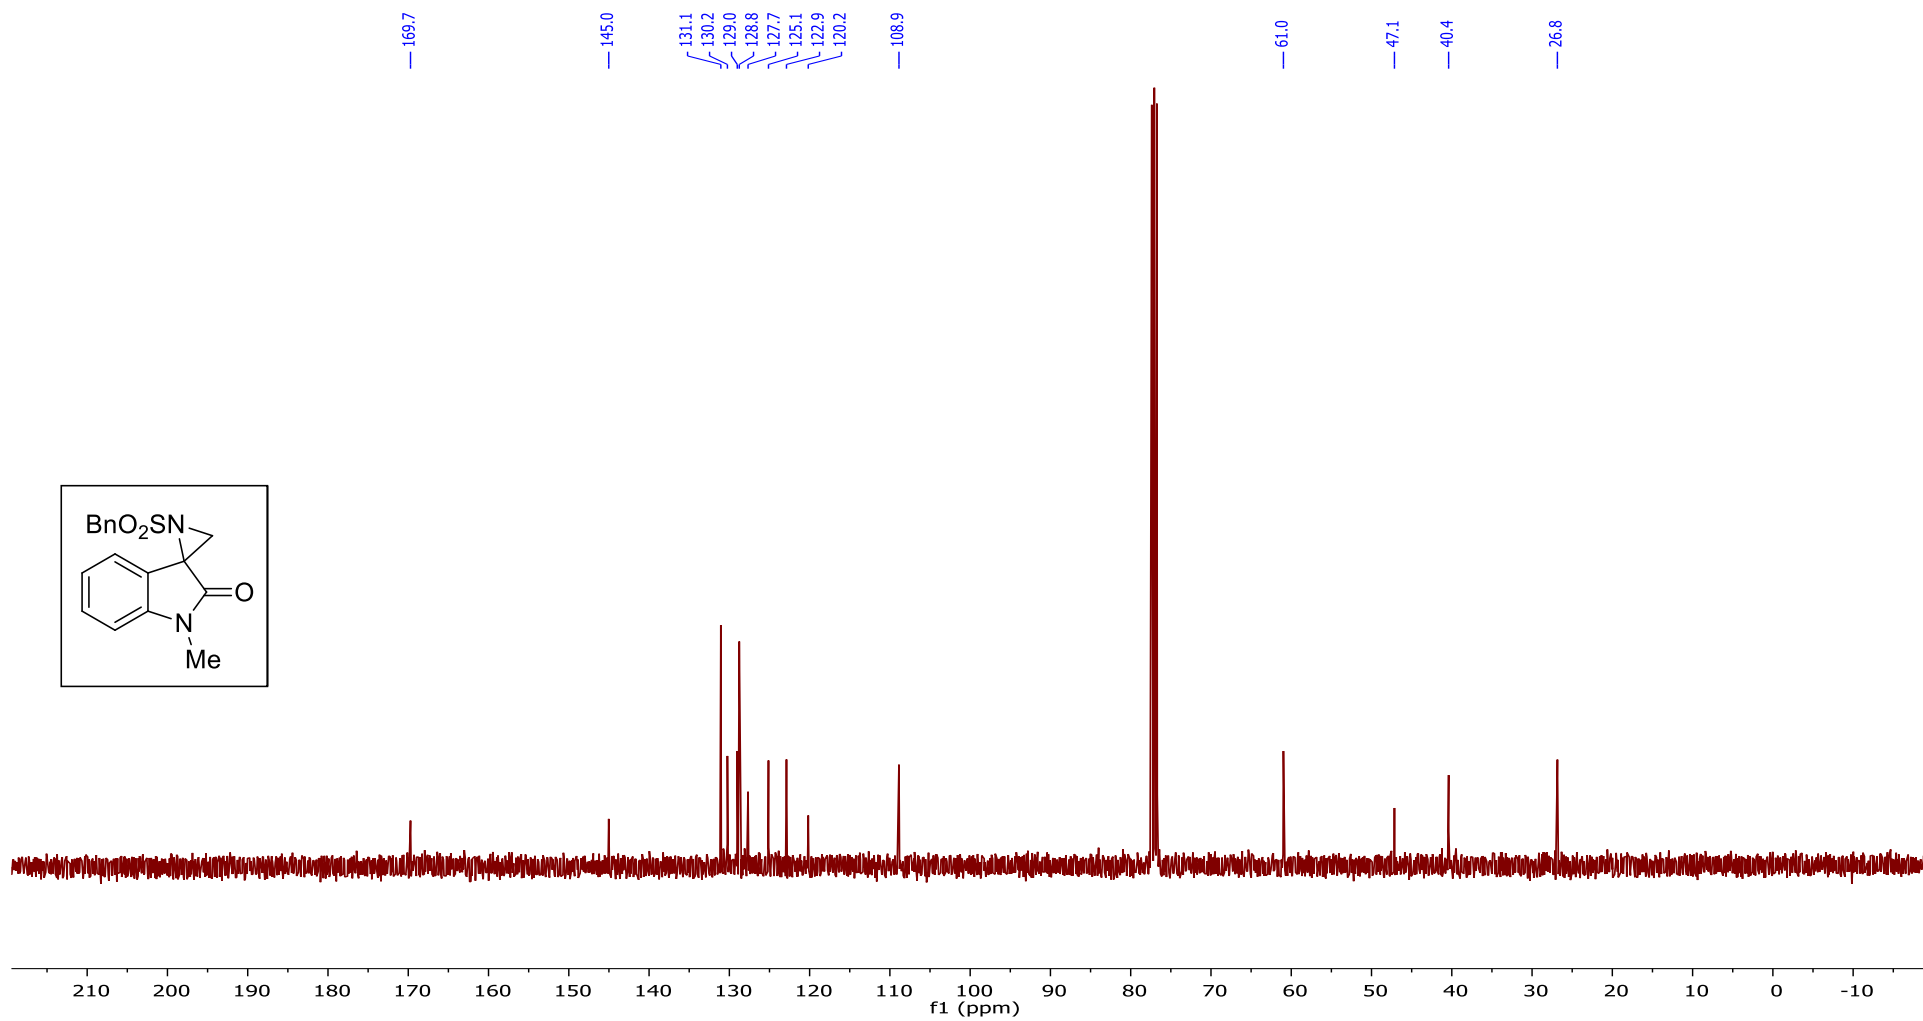

<sup>13</sup>C NMR spectrum of compound **1c** (100 MHz, CDCl<sub>3</sub>)

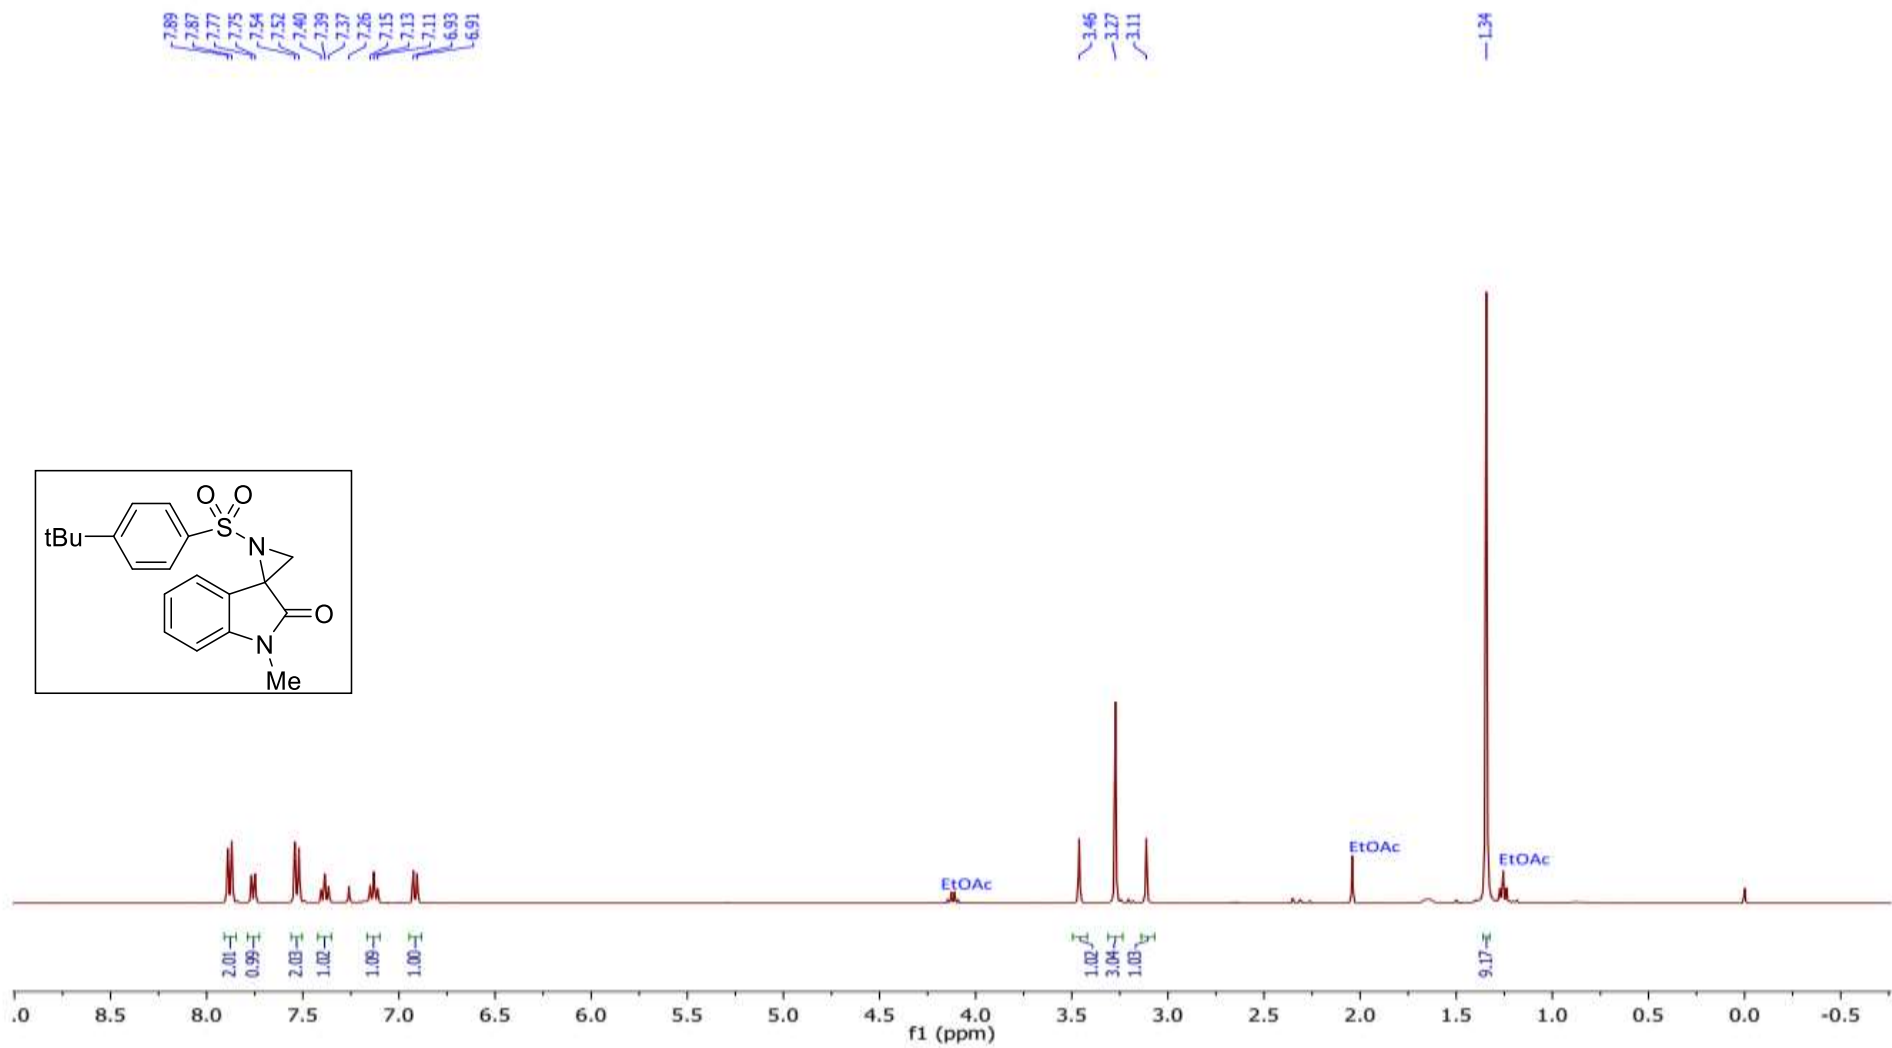

<sup>1</sup>H NMR spectrum of compound **1d** (400 MHz, CDCl<sub>3</sub>)



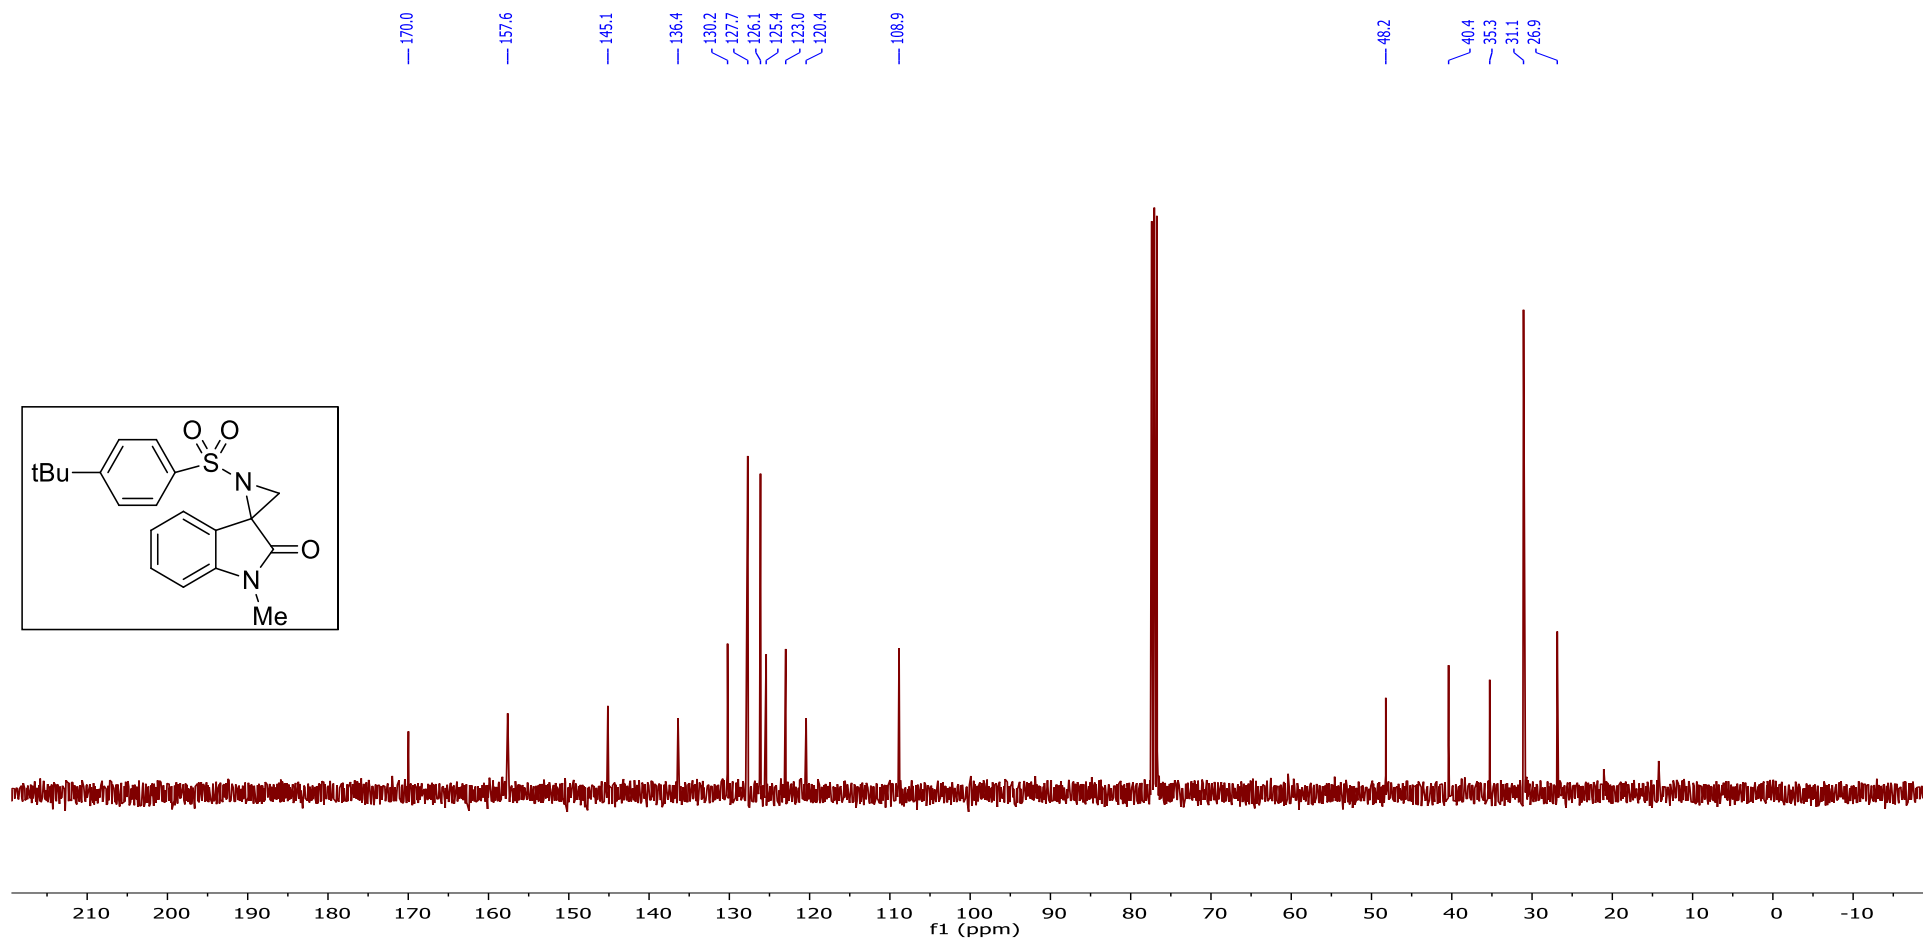

$^{13}\text{C}$  NMR spectrum of compound **1d** (100 MHz,  $\text{CDCl}_3$ )

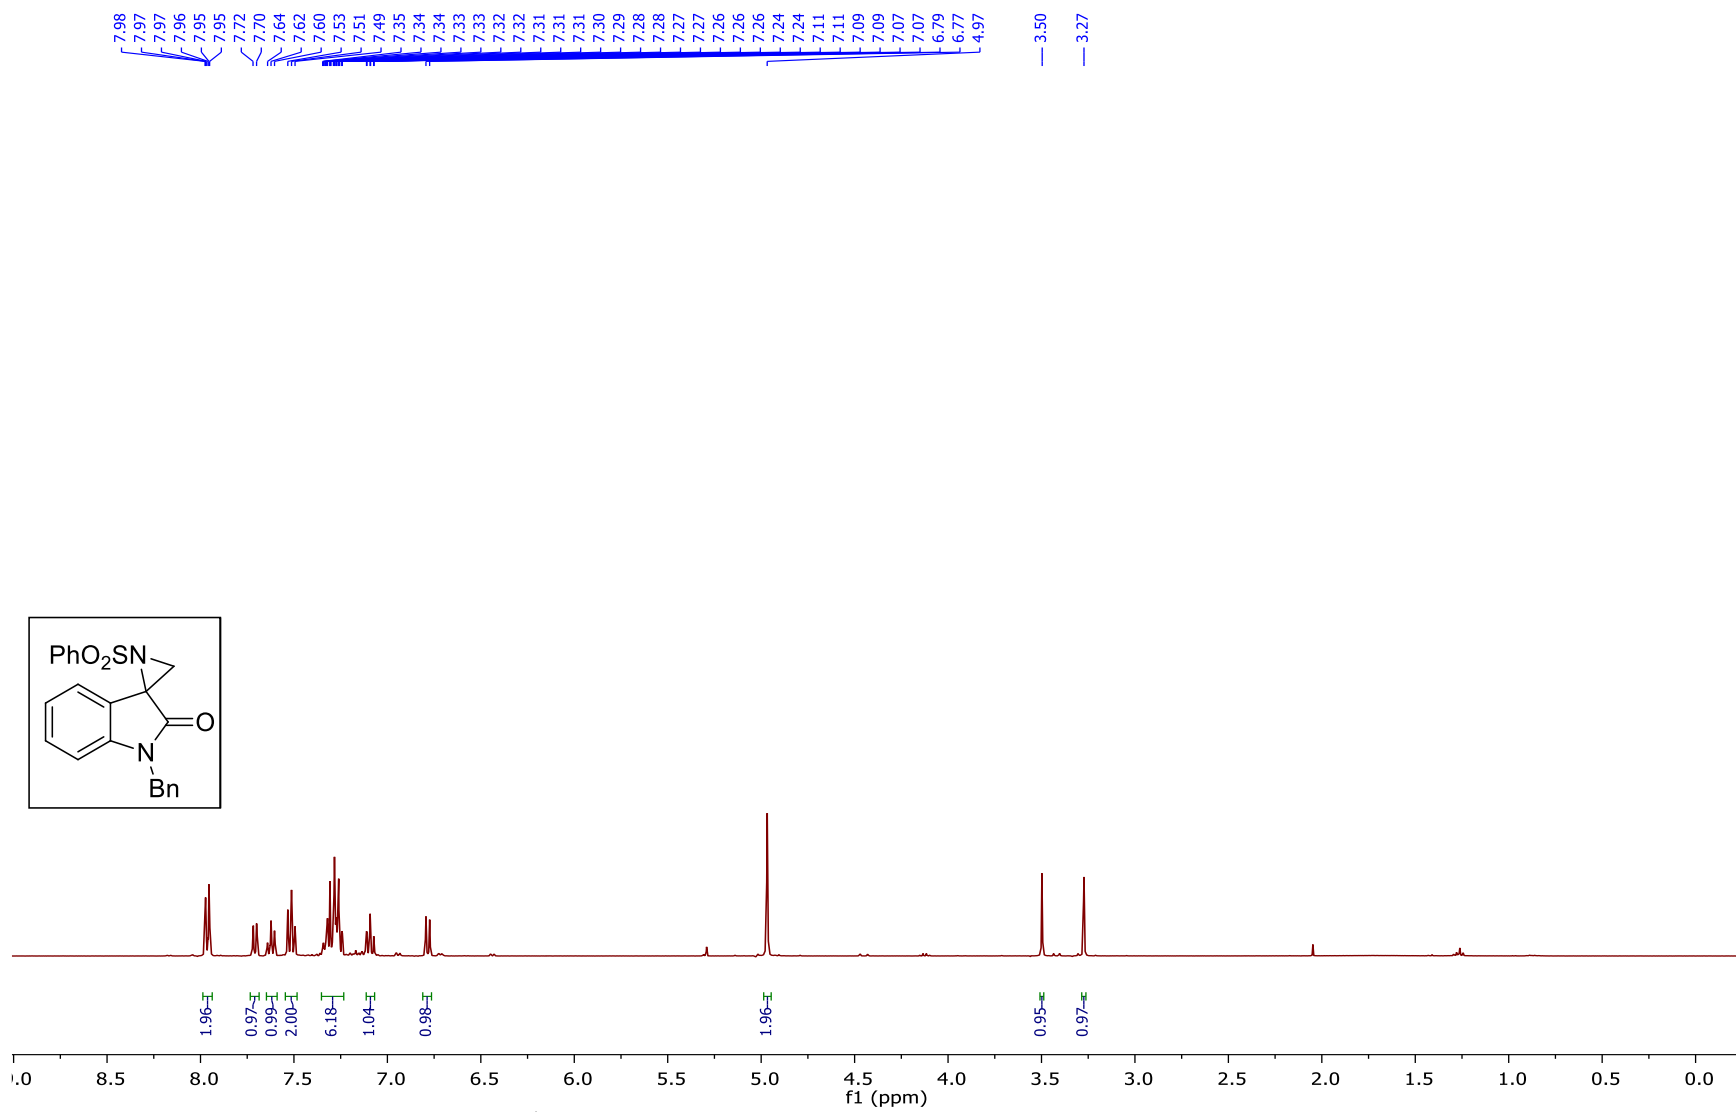

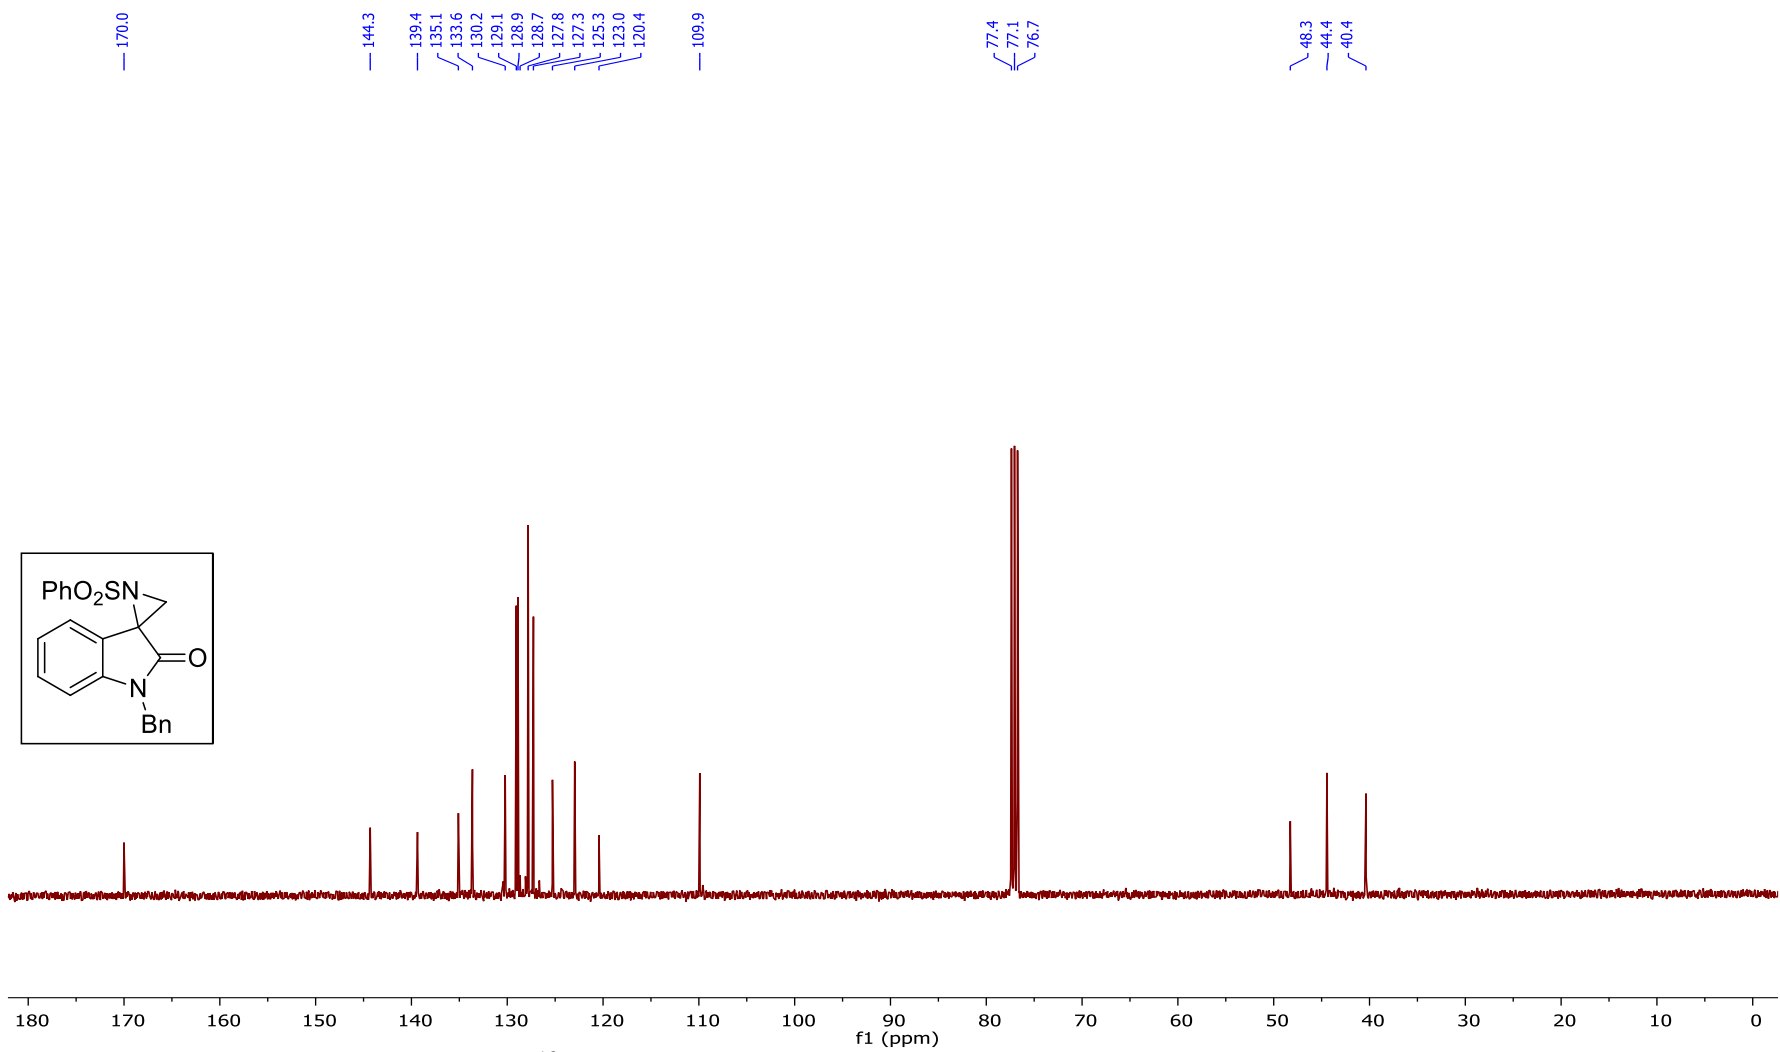

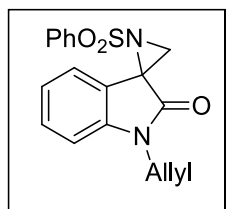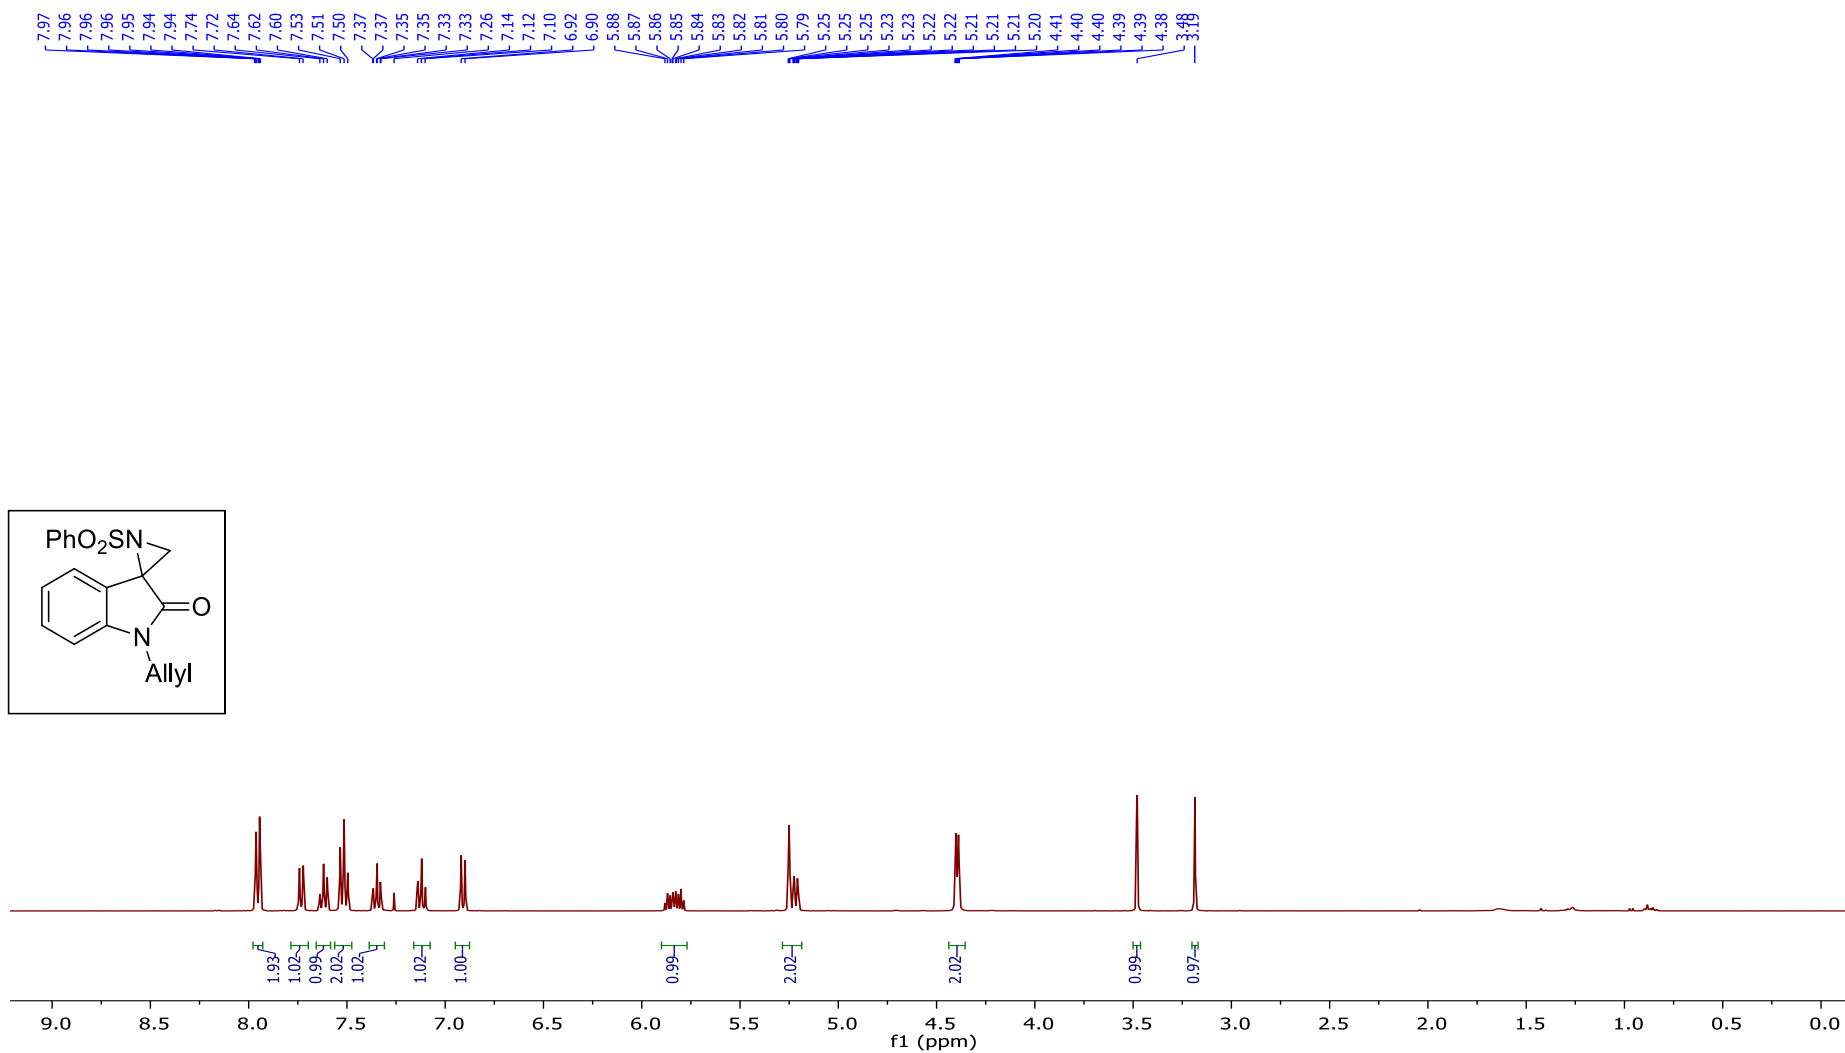

<sup>1</sup>H NMR spectrum of compound **1j** (400 MHz, CDCl<sub>3</sub>)

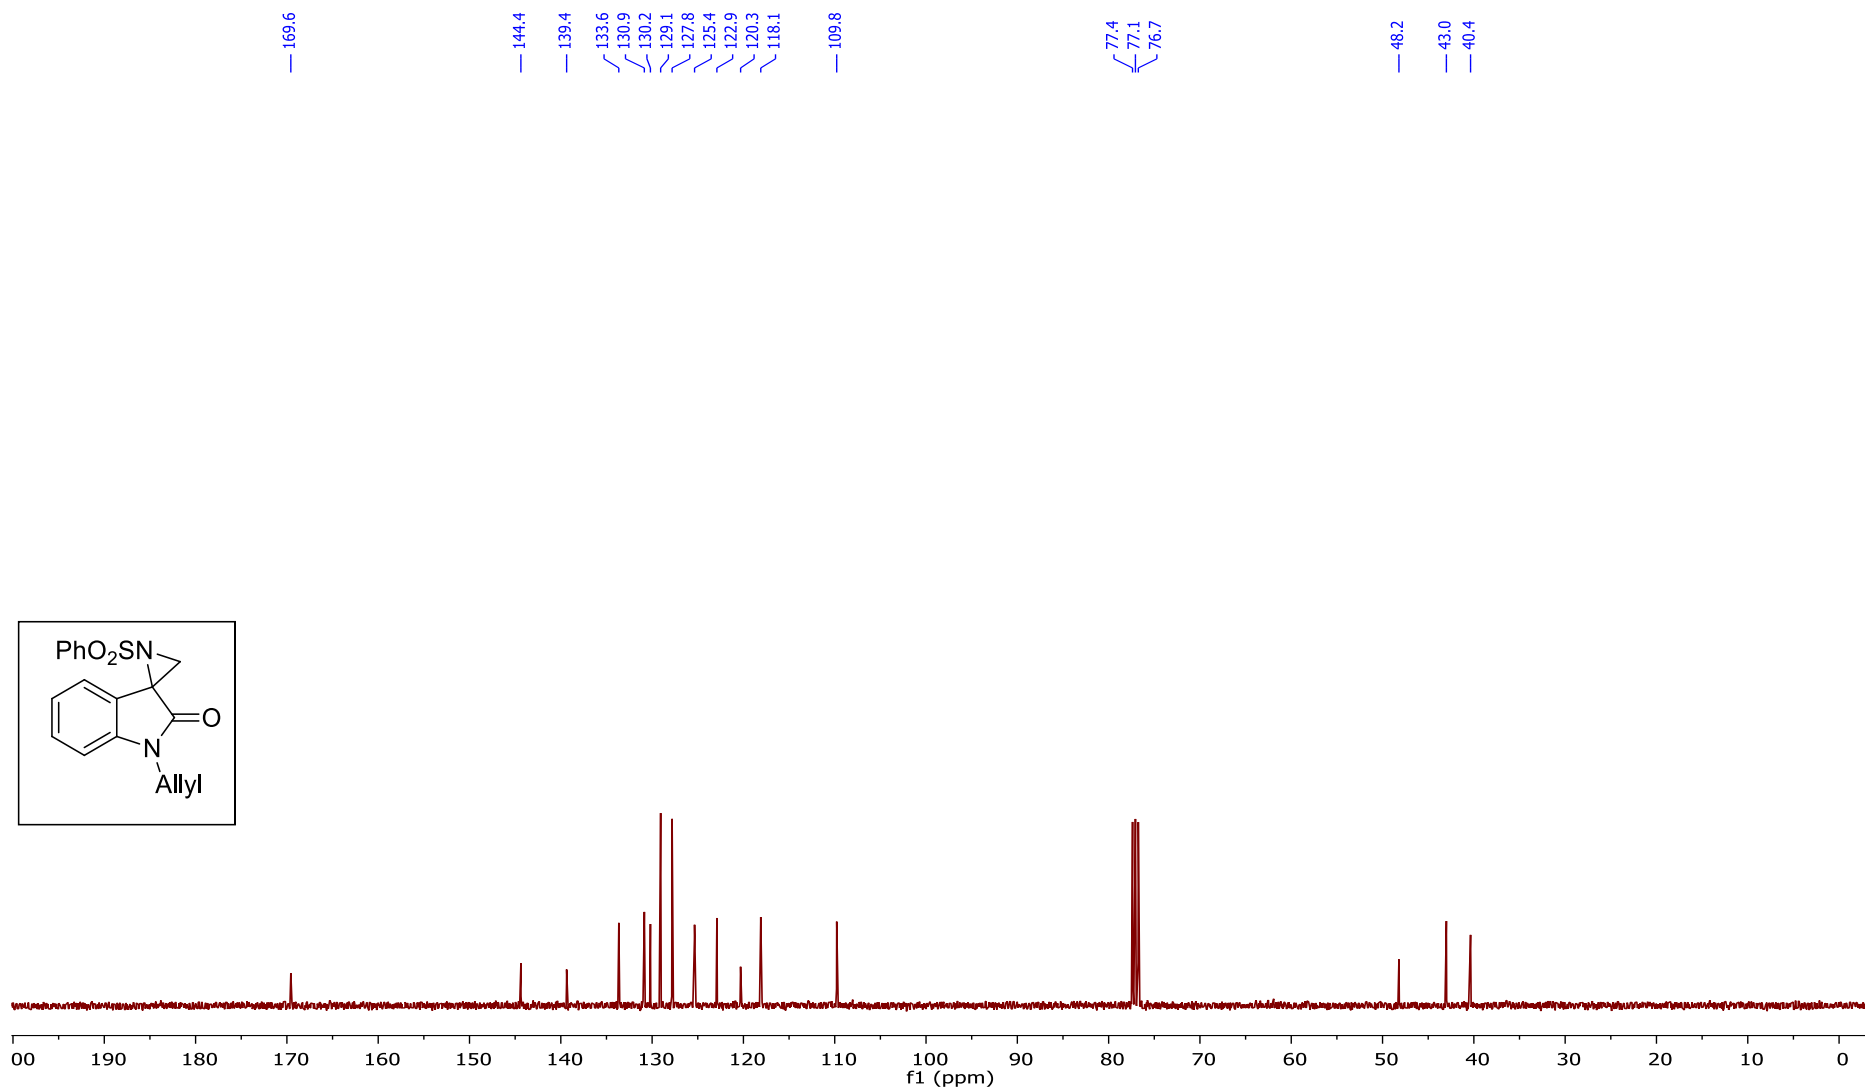

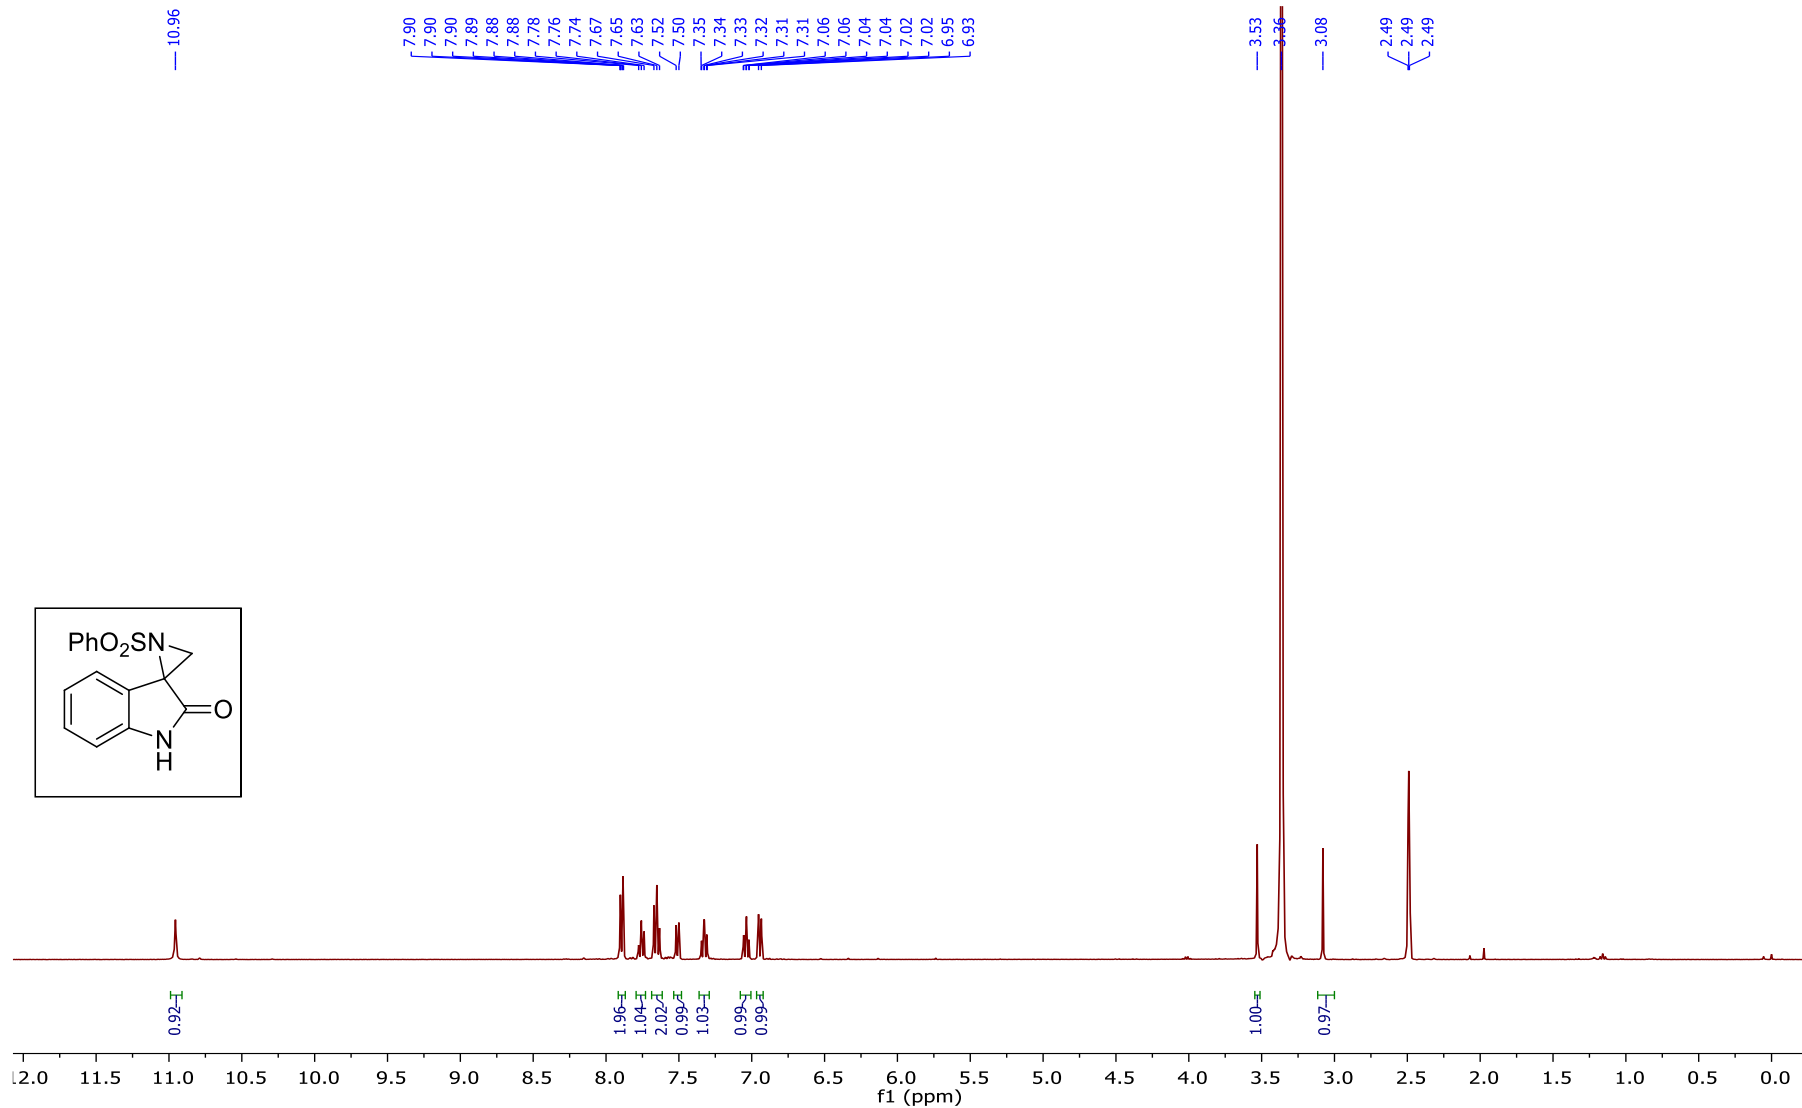

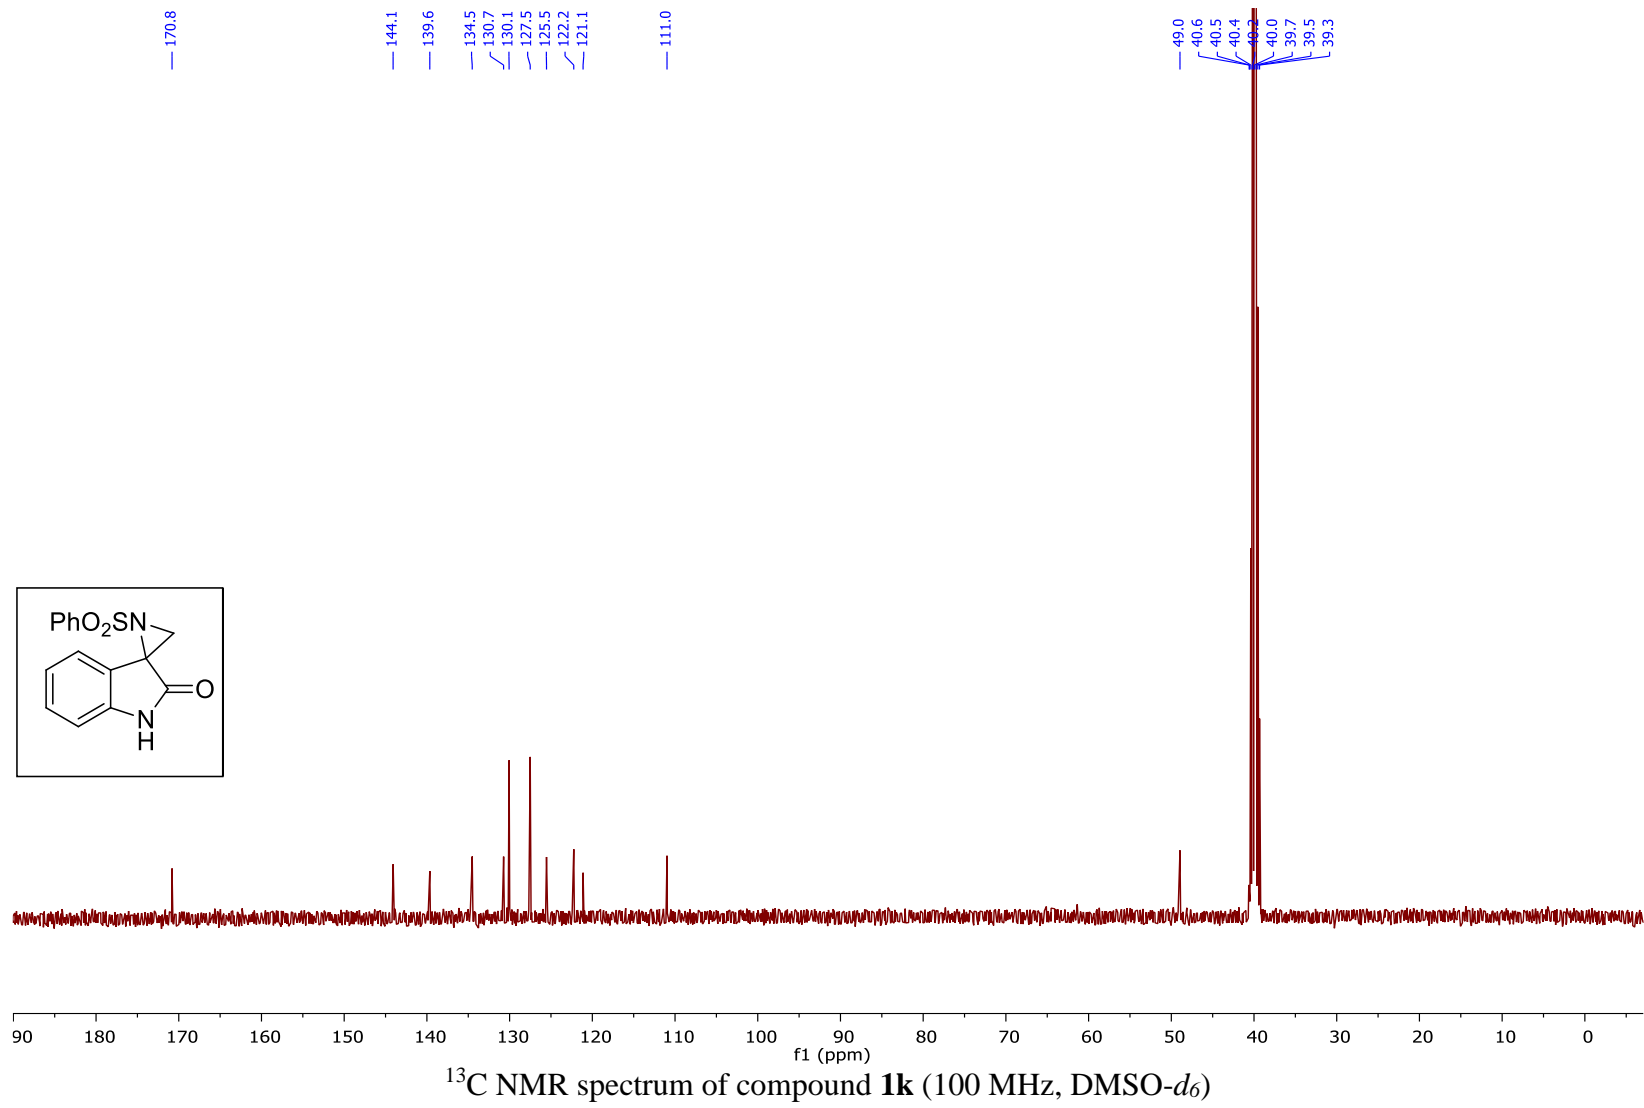

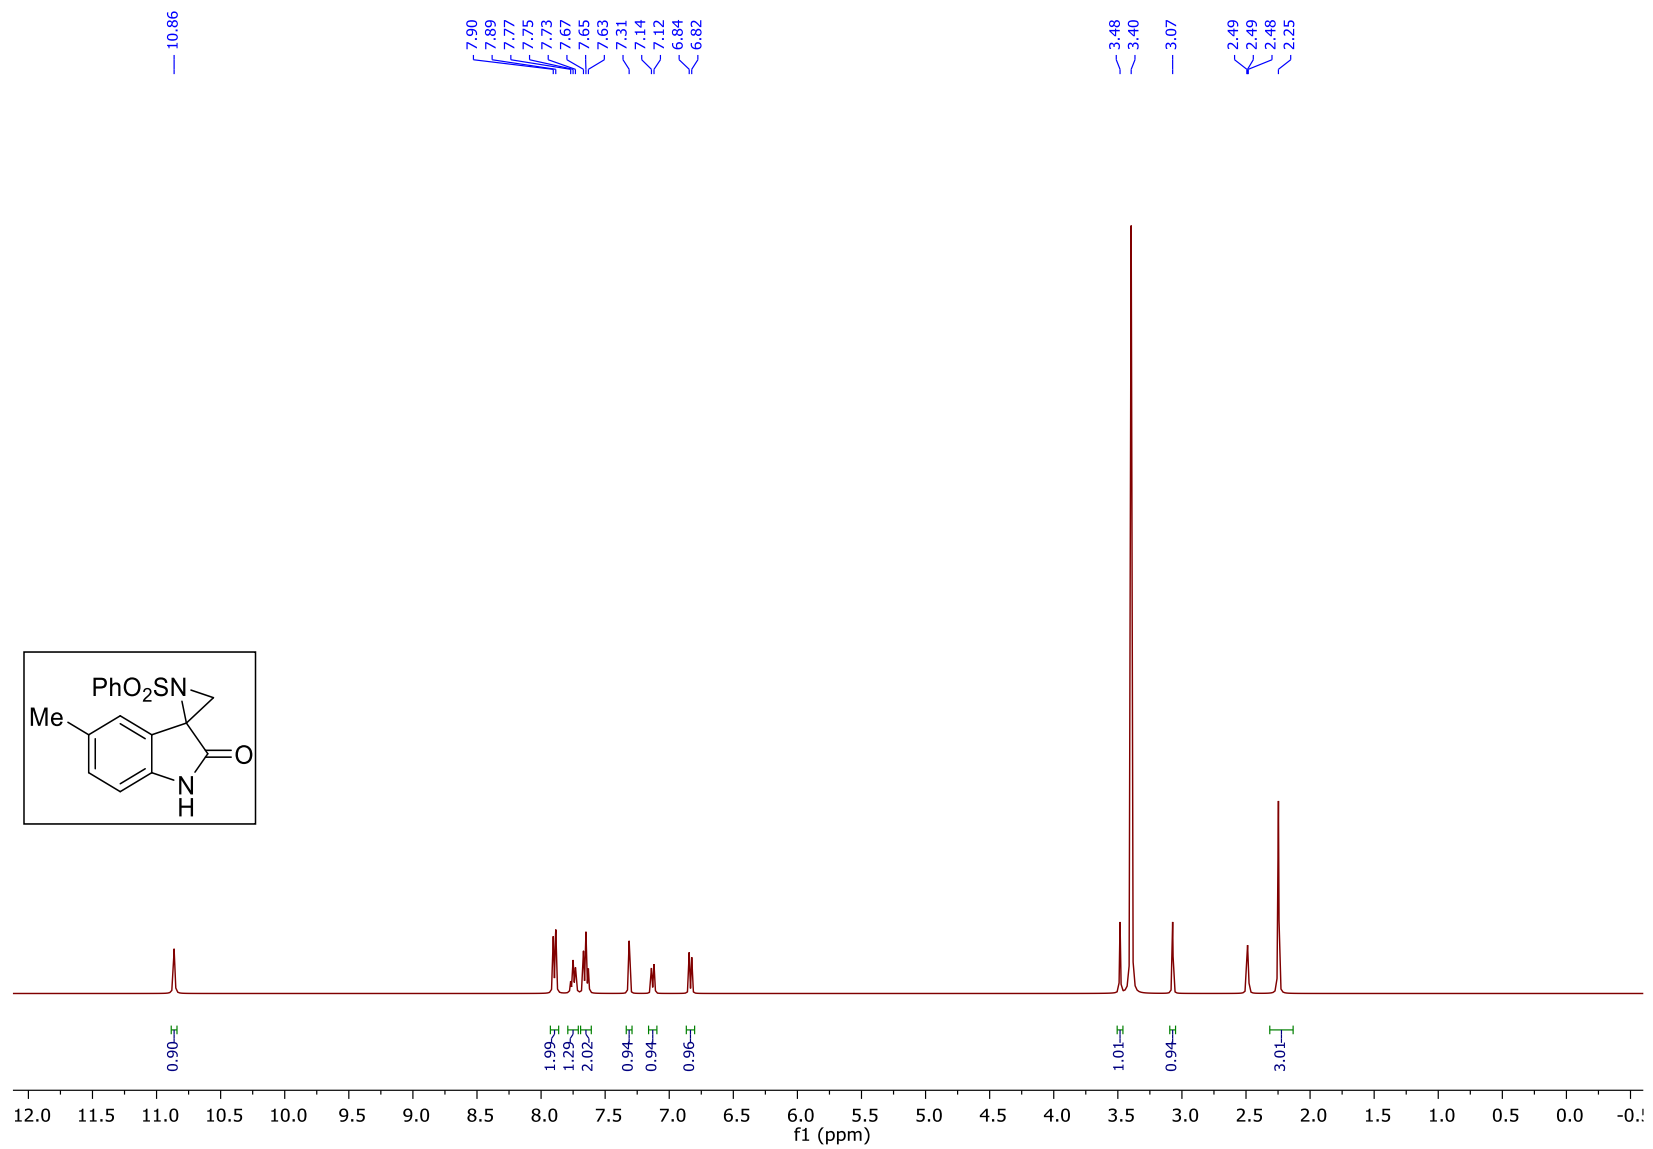

<sup>1</sup>H NMR spectrum of compound **11** (400 MHz, DMSO-*d*<sub>6</sub>)



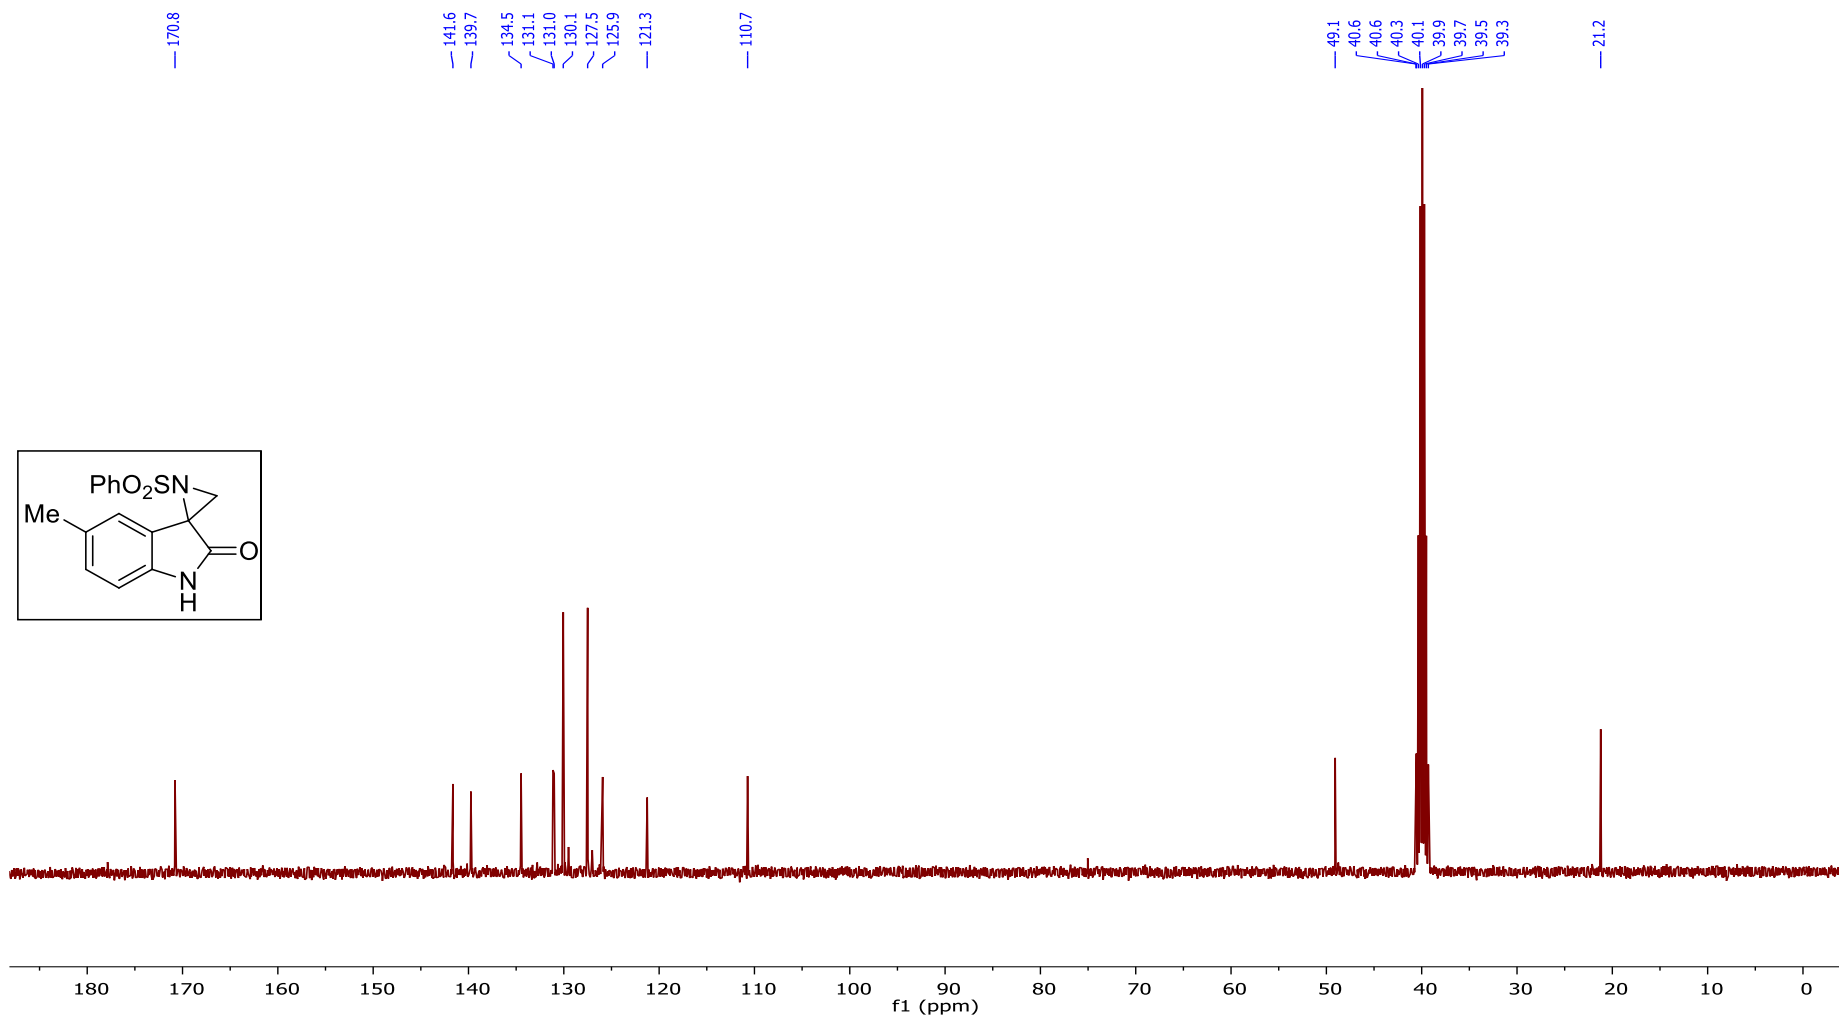

<sup>13</sup>C NMR spectrum of compound **11** (100 MHz, DMSO-*d*<sub>6</sub>)

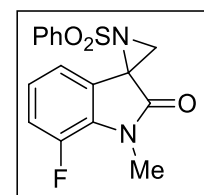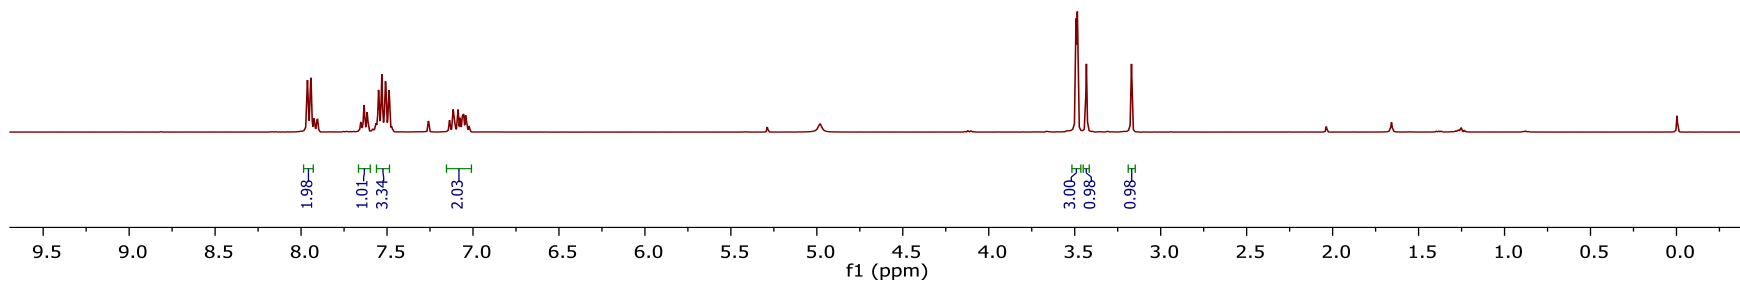

<sup>1</sup>H NMR spectrum of compound **1m** (400 MHz, CDCl<sub>3</sub>)

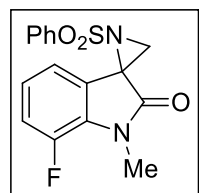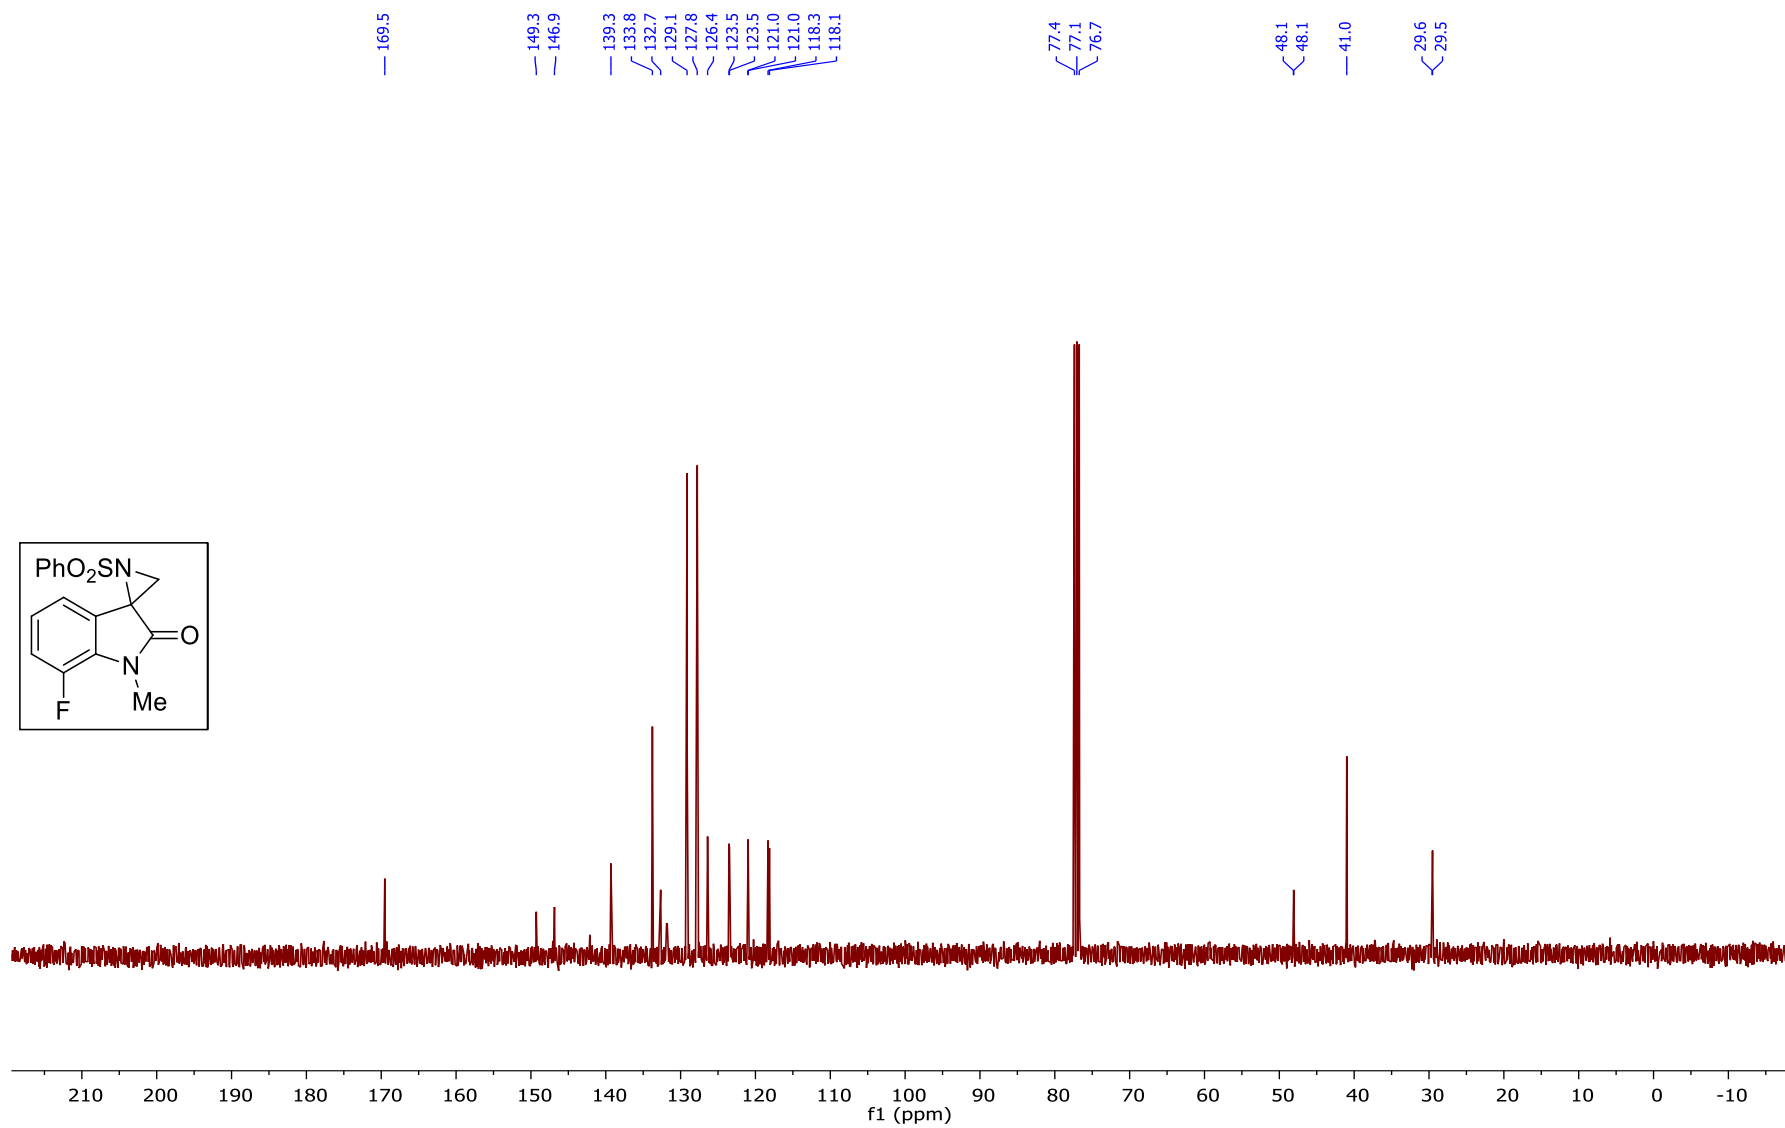

$^{13}\text{C}$  NMR spectrum of compound **1m** (100 MHz,  $\text{CDCl}_3$ )

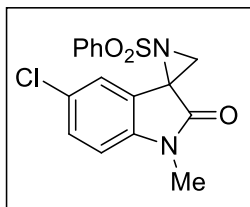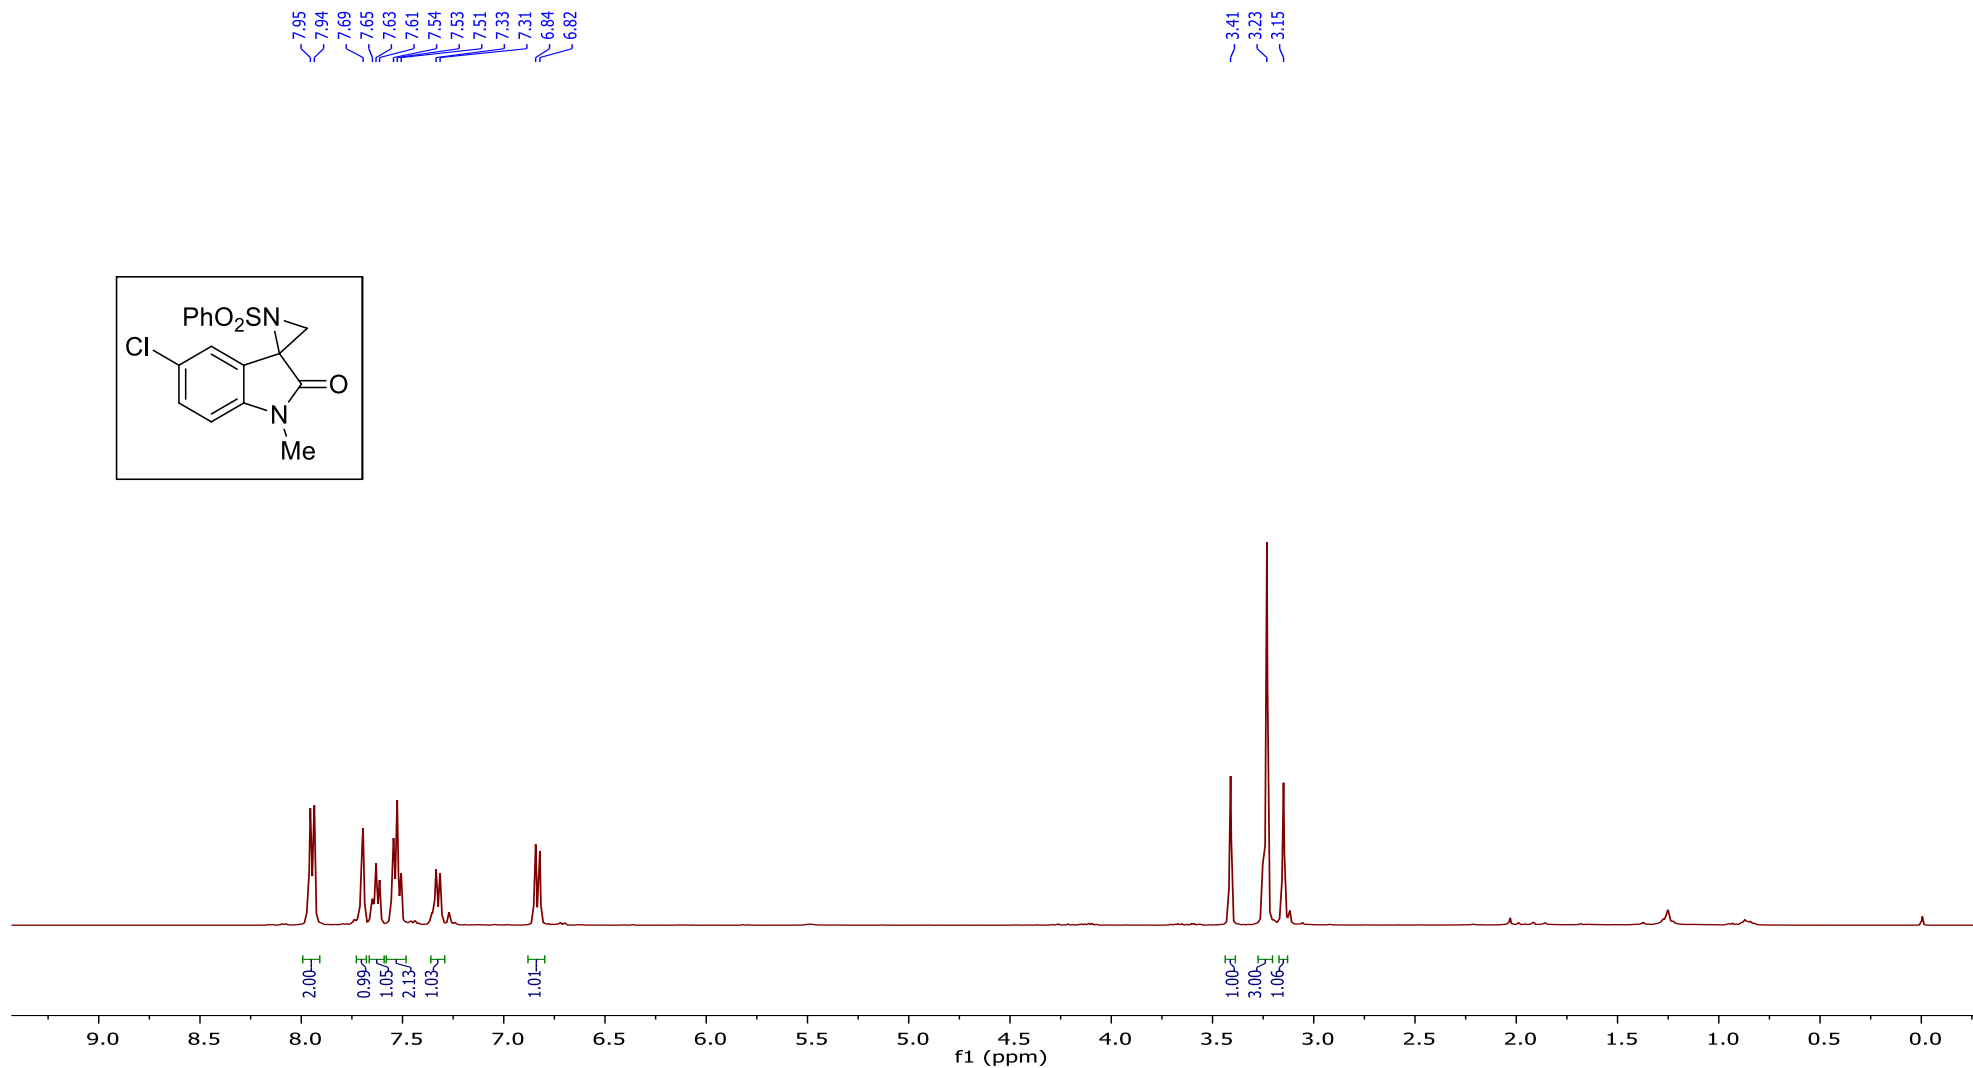

<sup>1</sup>H NMR spectrum of compound **1n** (400 MHz, CDCl<sub>3</sub>)

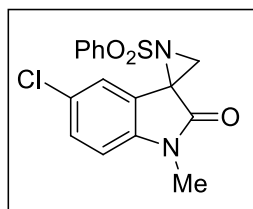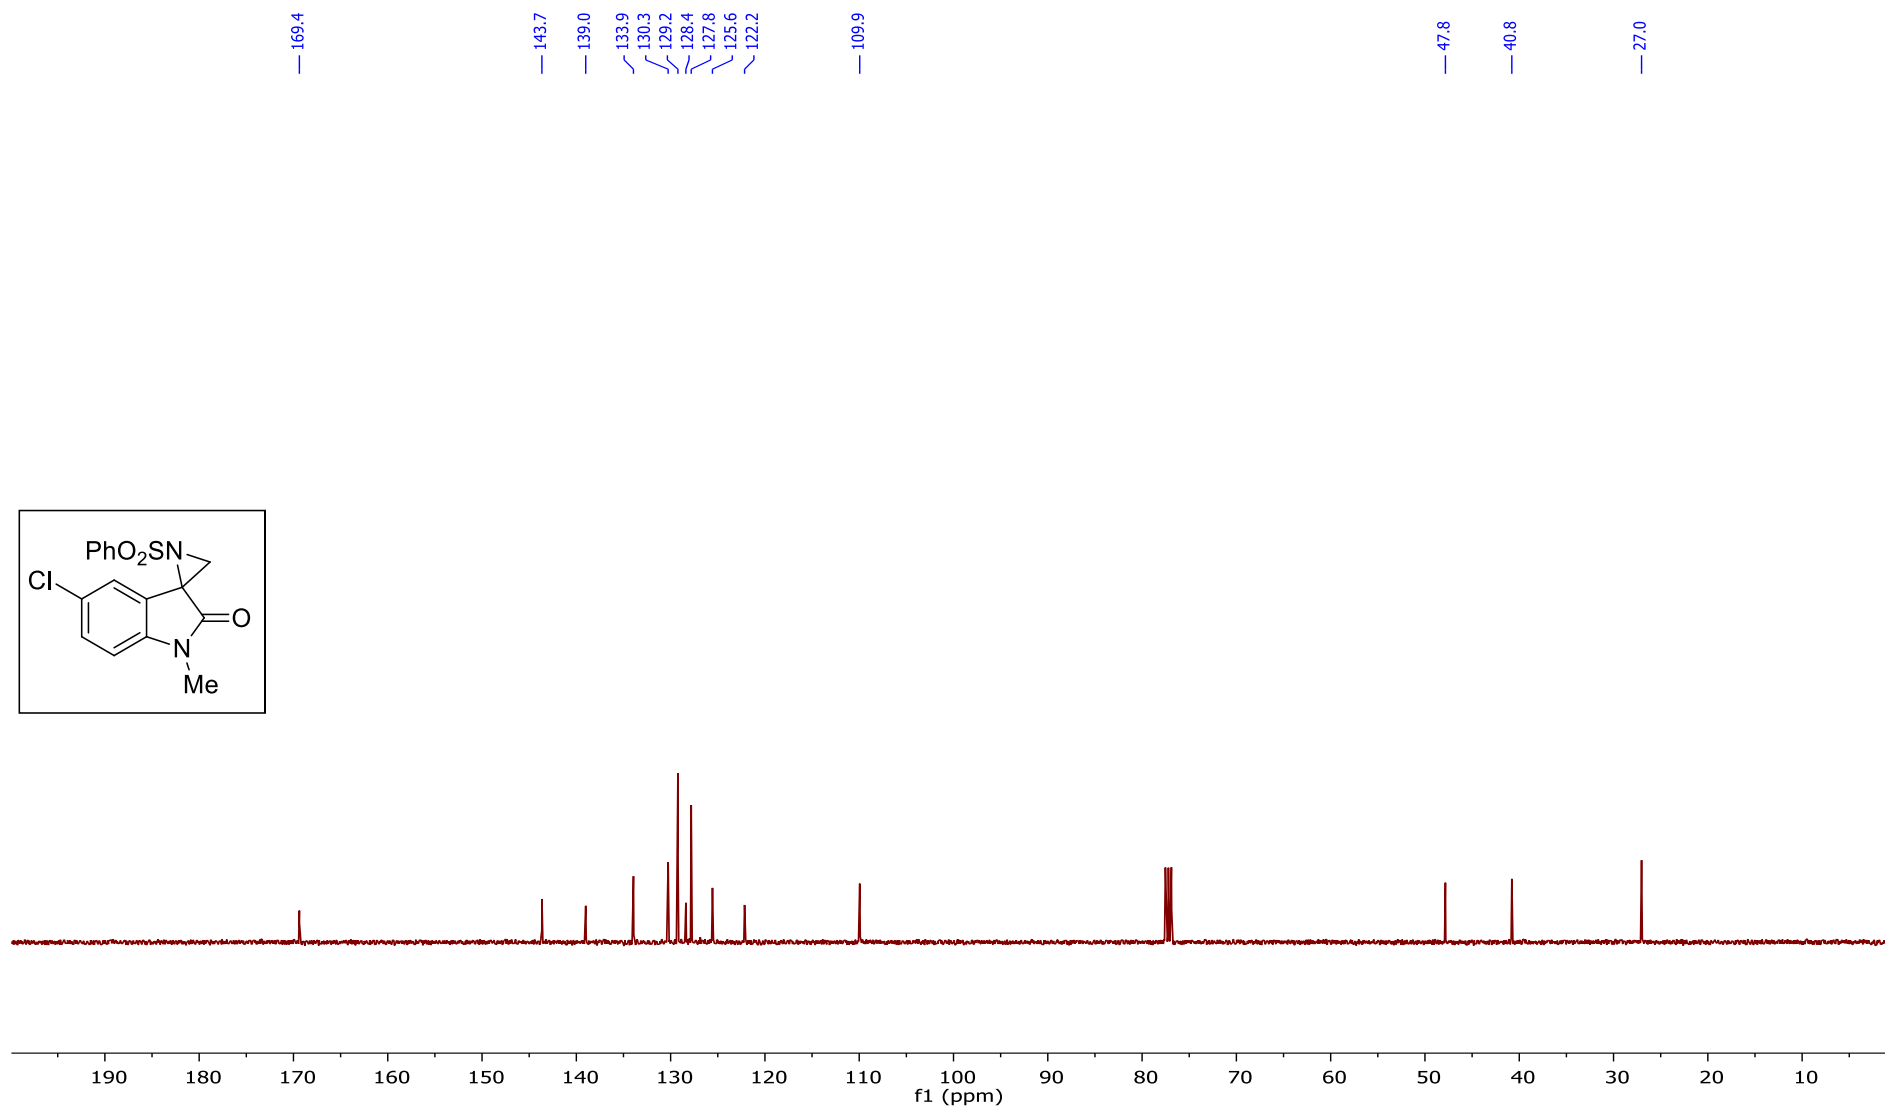

$^{13}\text{C}$  NMR spectrum of compound **1n** (100 MHz,  $\text{CDCl}_3$ )

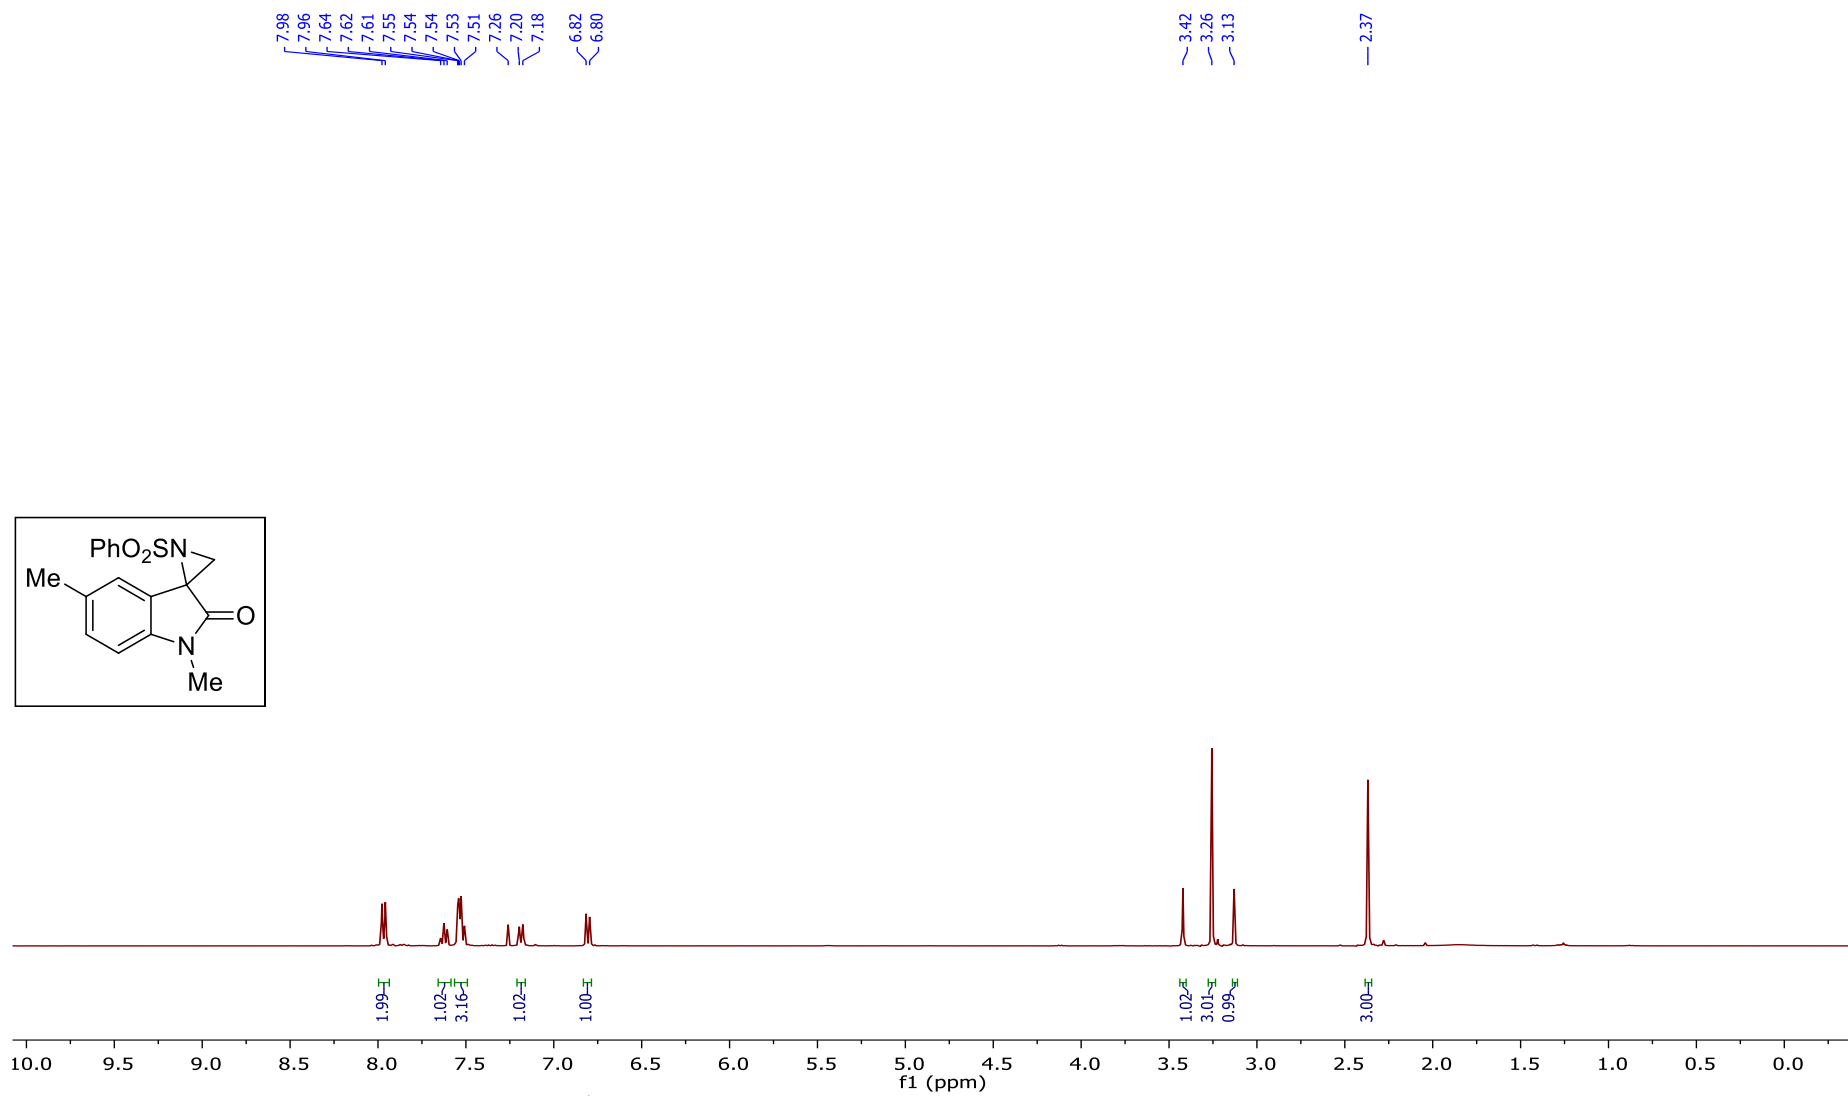

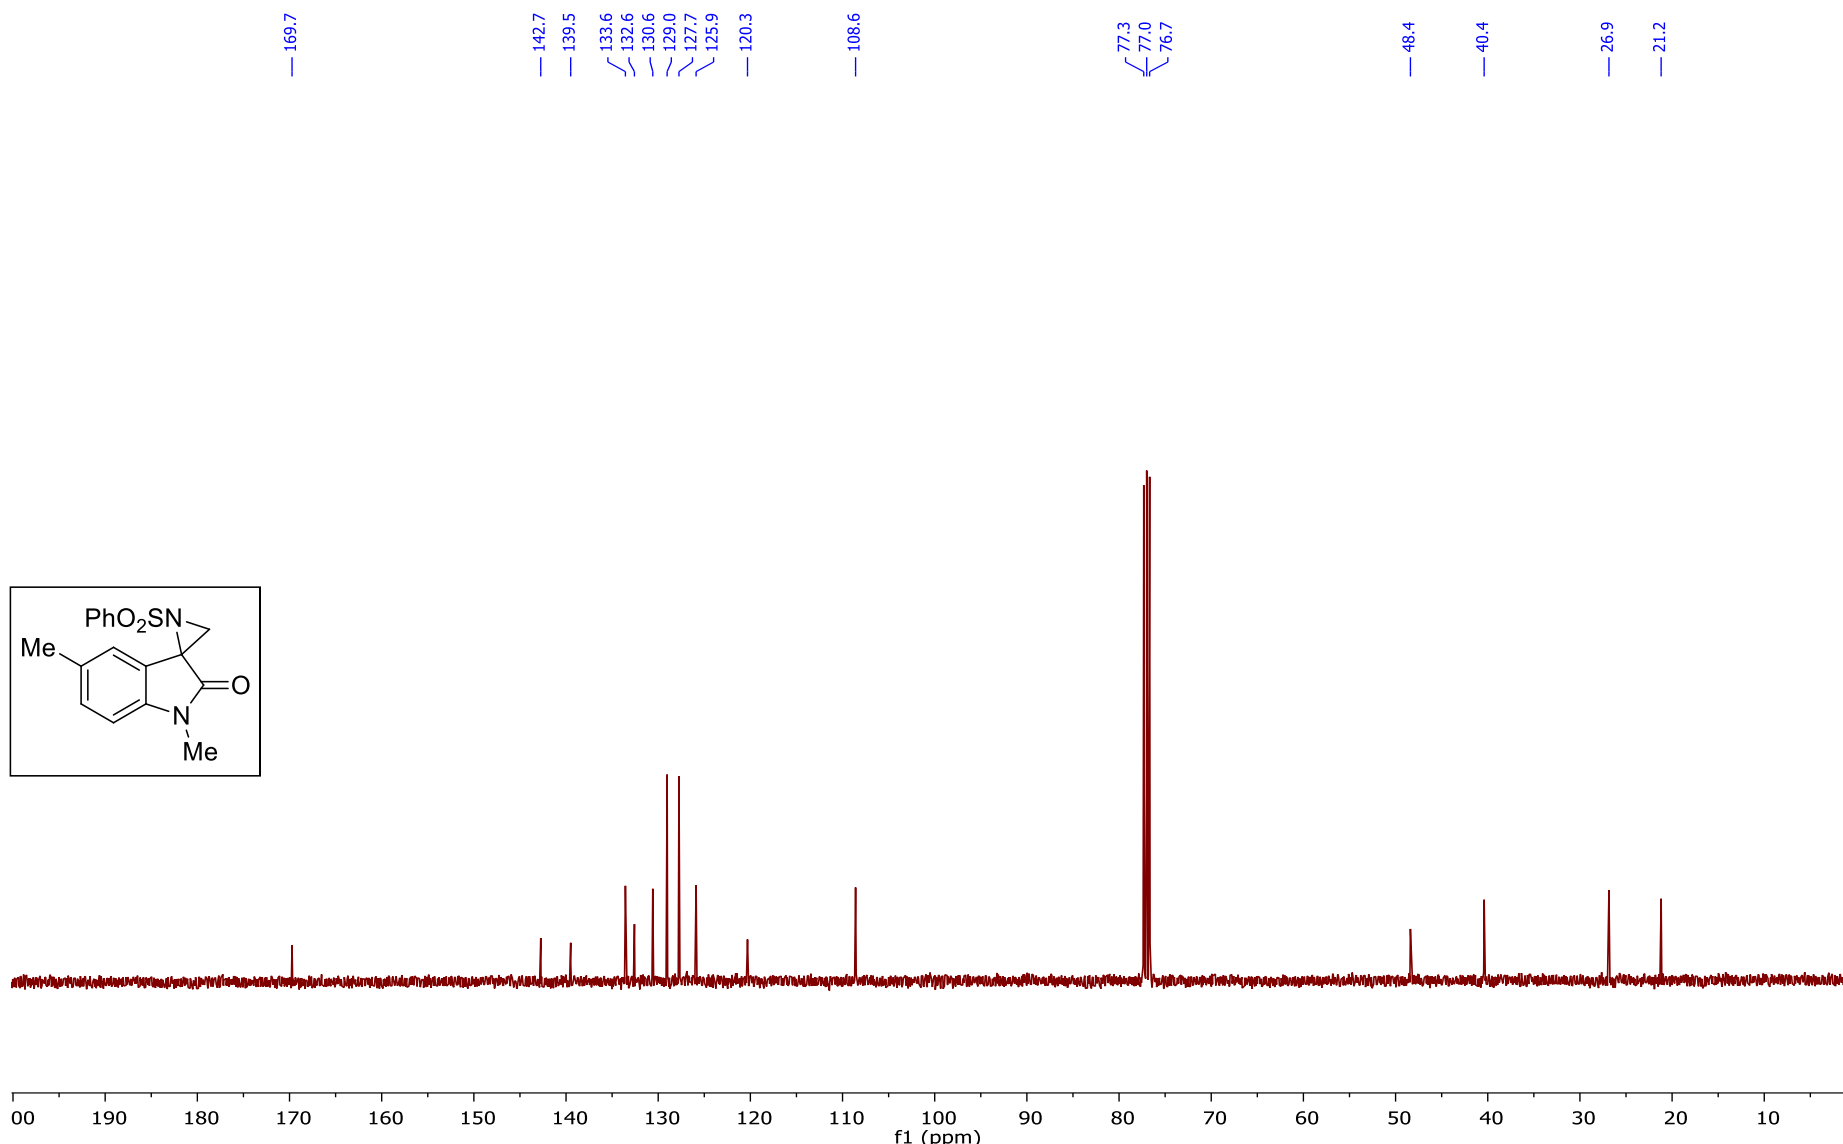

<sup>13</sup>C NMR spectrum of compound **1o** (100 MHz, CDCl<sub>3</sub>)

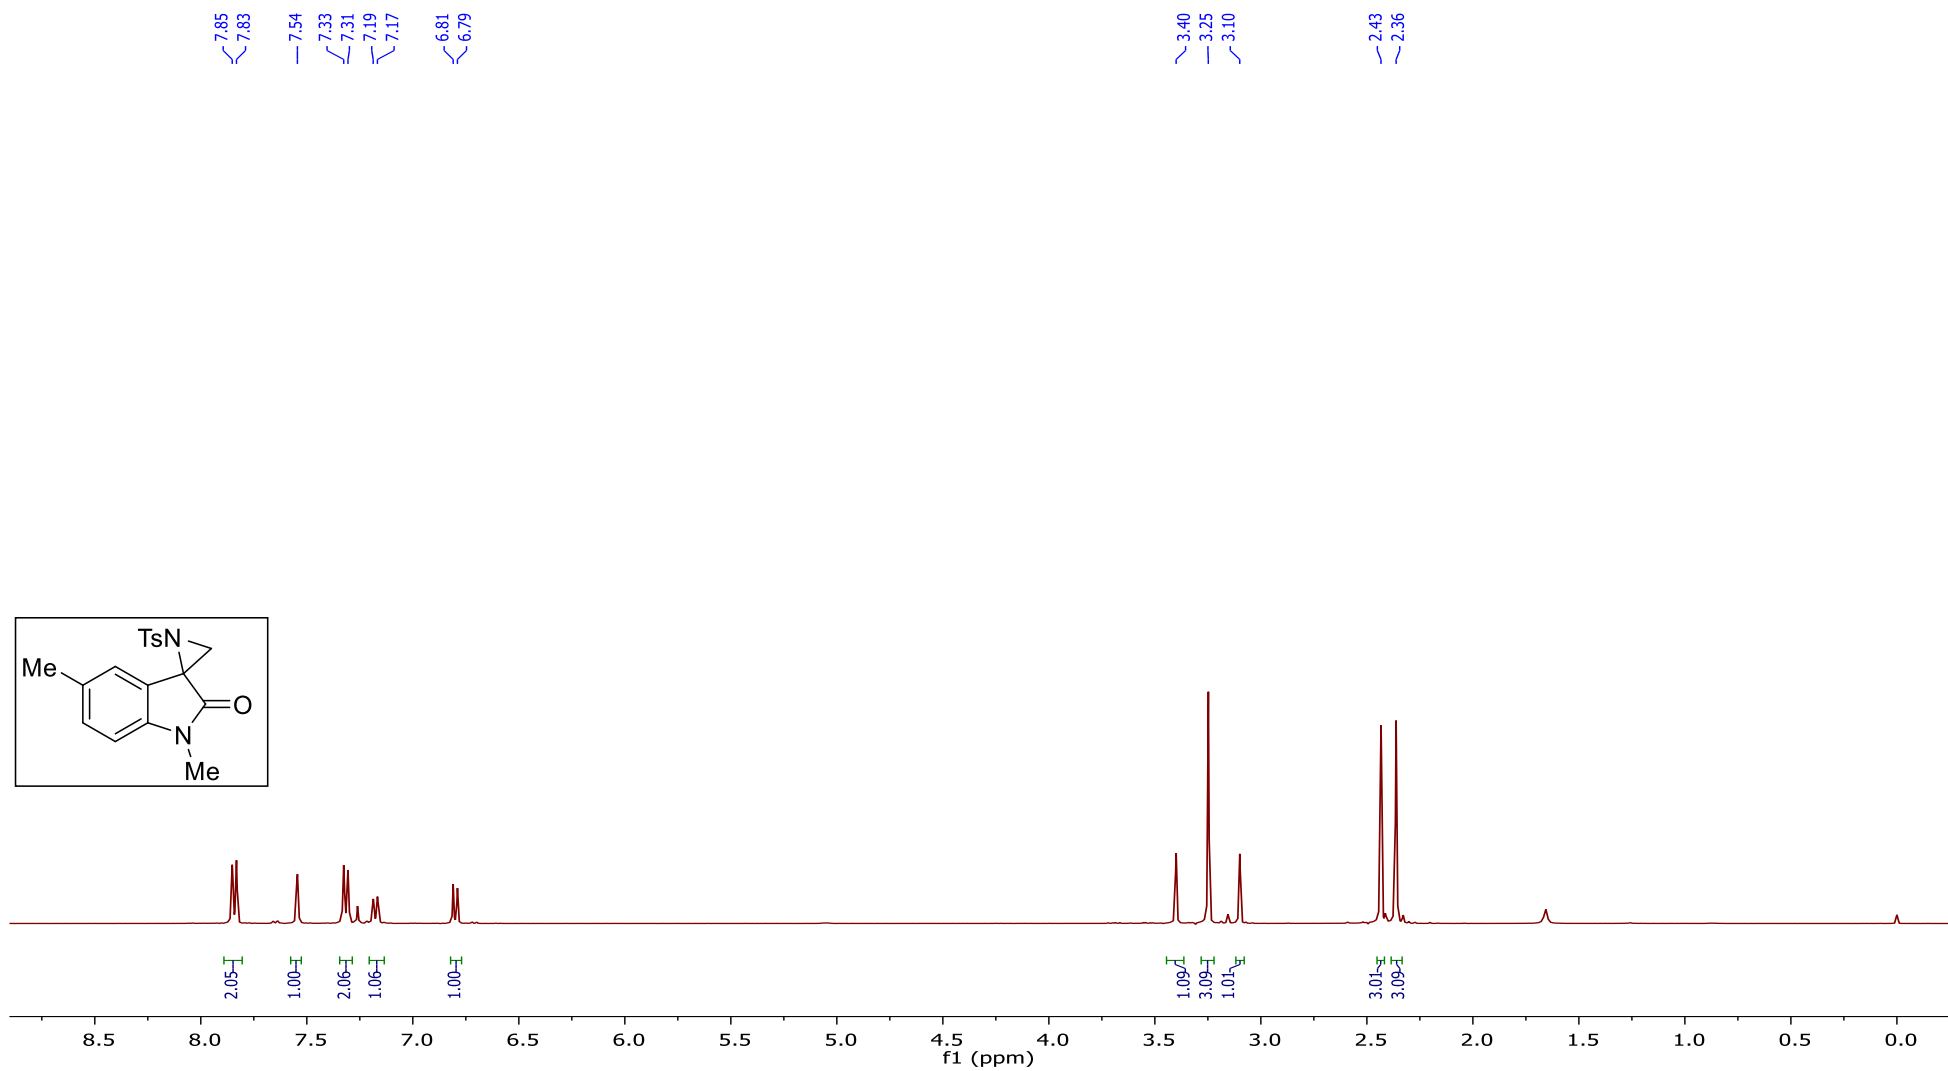

<sup>1</sup>H NMR spectrum of compound **1p** (400 MHz, CDCl<sub>3</sub>)



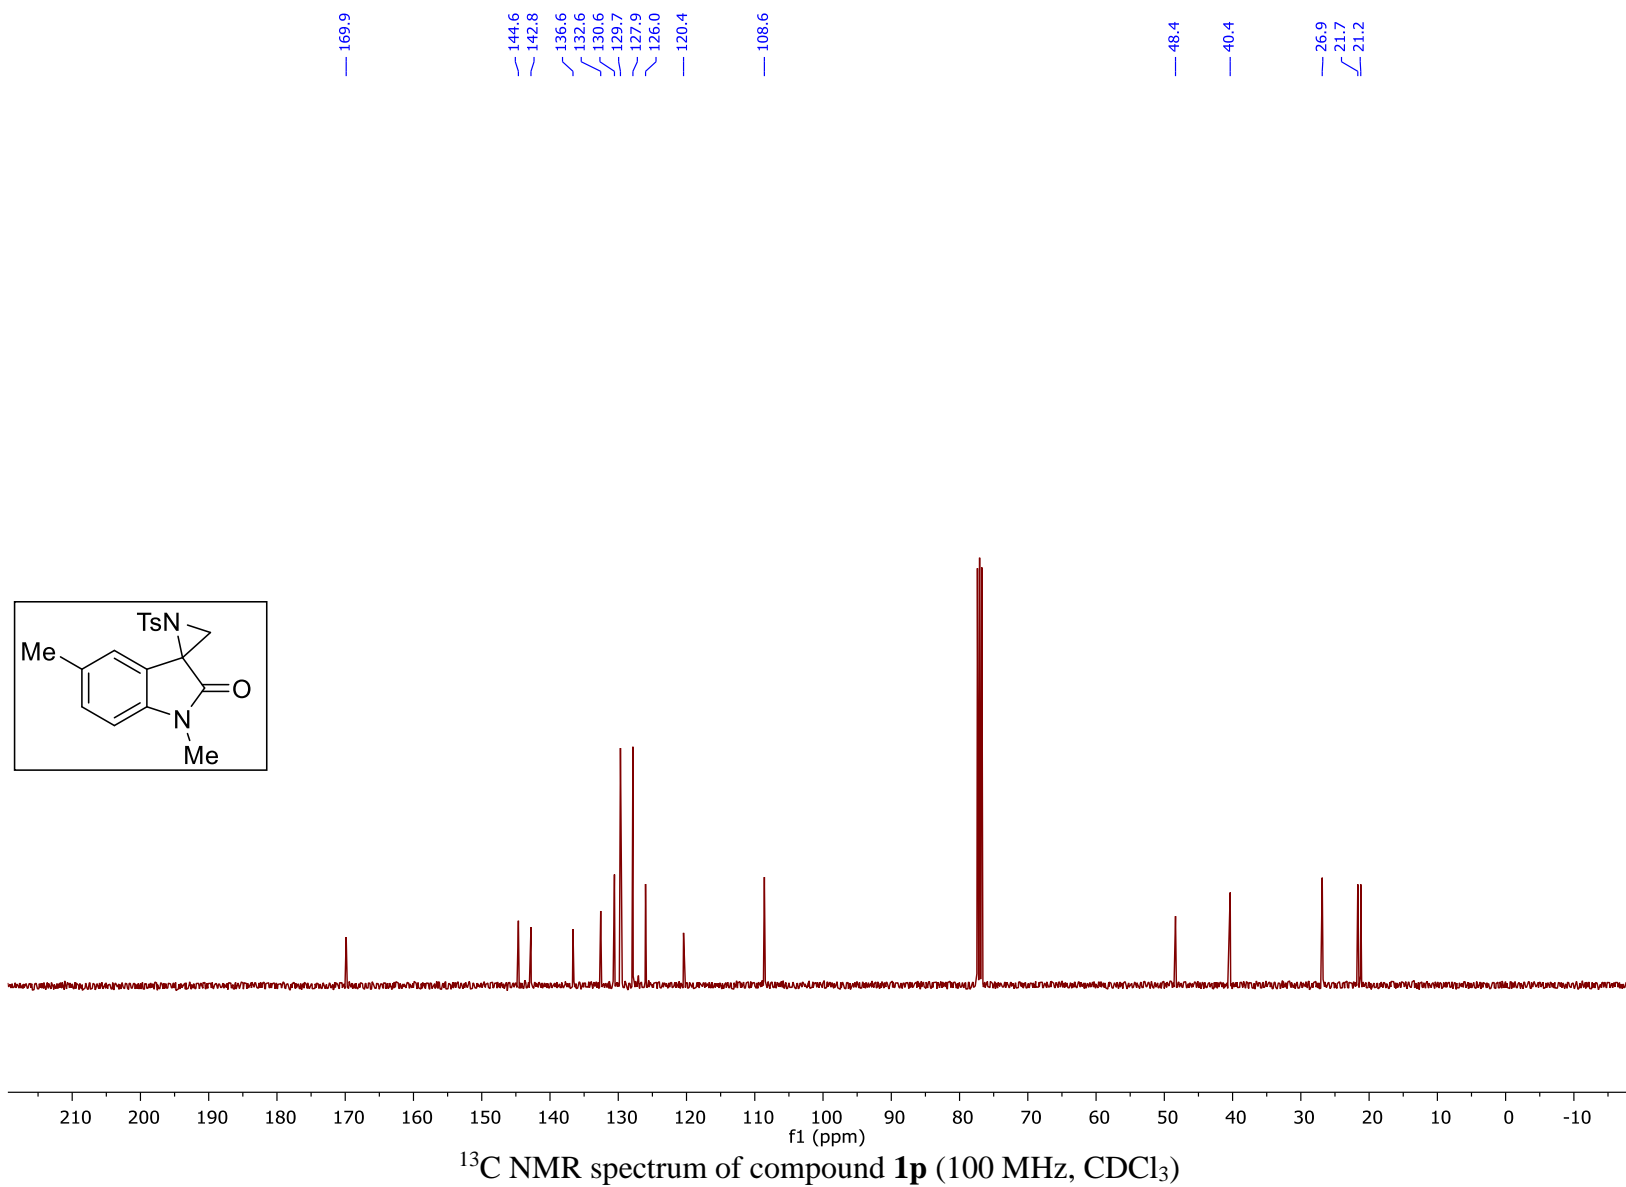

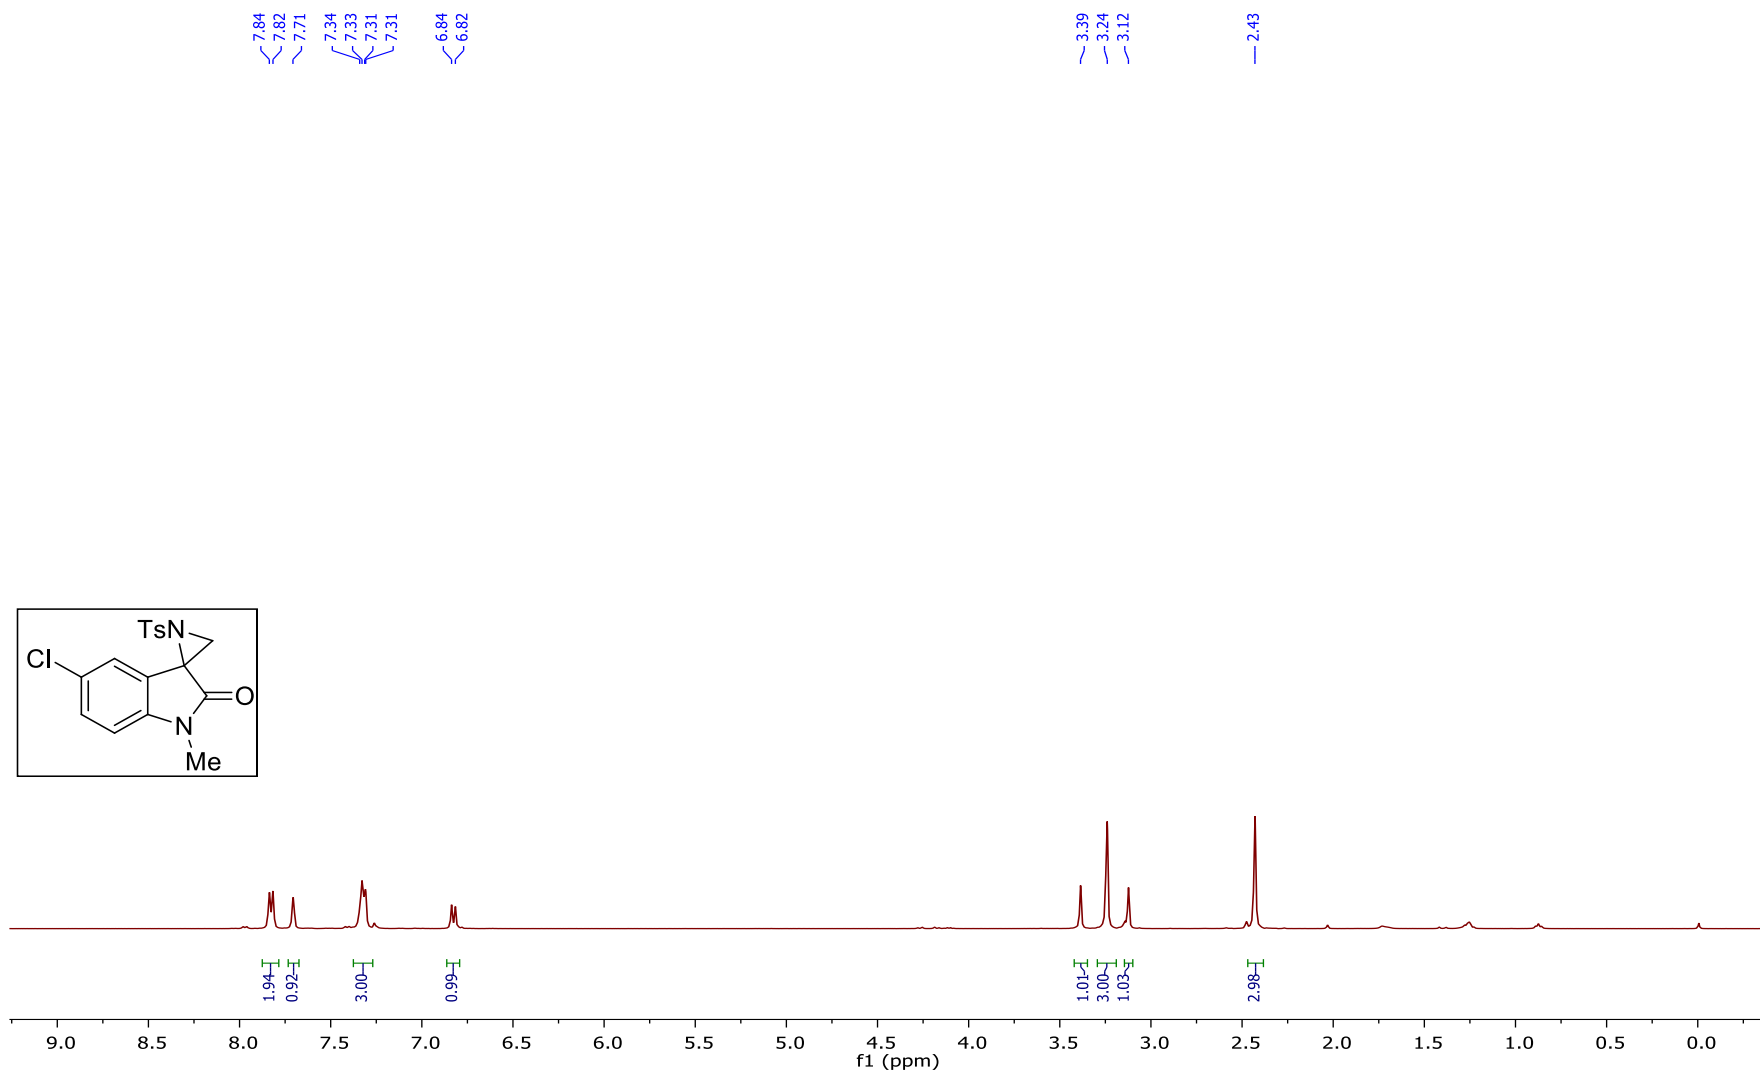

<sup>1</sup>H NMR spectrum of compound **1q** (400 MHz, CDCl<sub>3</sub>)

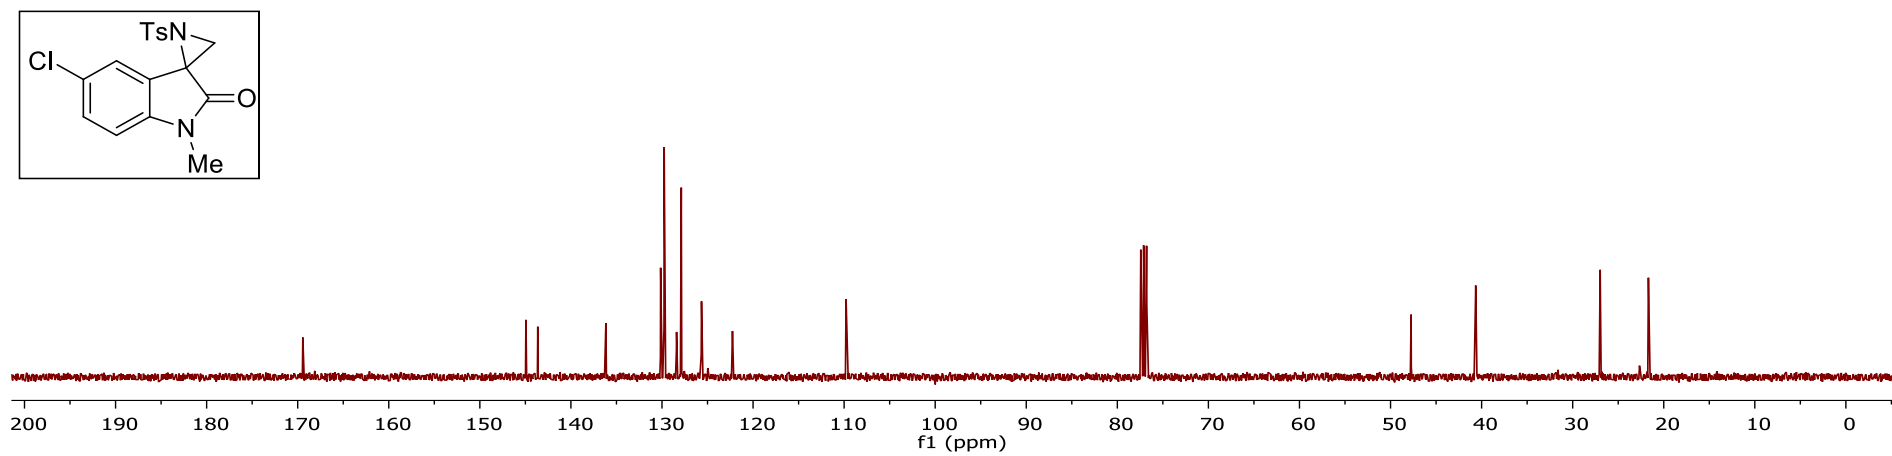

— 169.4

— 144.9  
— 143.6

— 136.2

— 130.1

— 129.8

— 128.4

— 127.9

— 125.7

— 122.3

— 109.8

— 77.4  
— 77.1  
— 76.8

— 47.7

— 40.6

— 27.0

— 21.7

$^{13}\text{C}$  NMR spectrum of compound **1q** (100 MHz,  $\text{CDCl}_3$ )

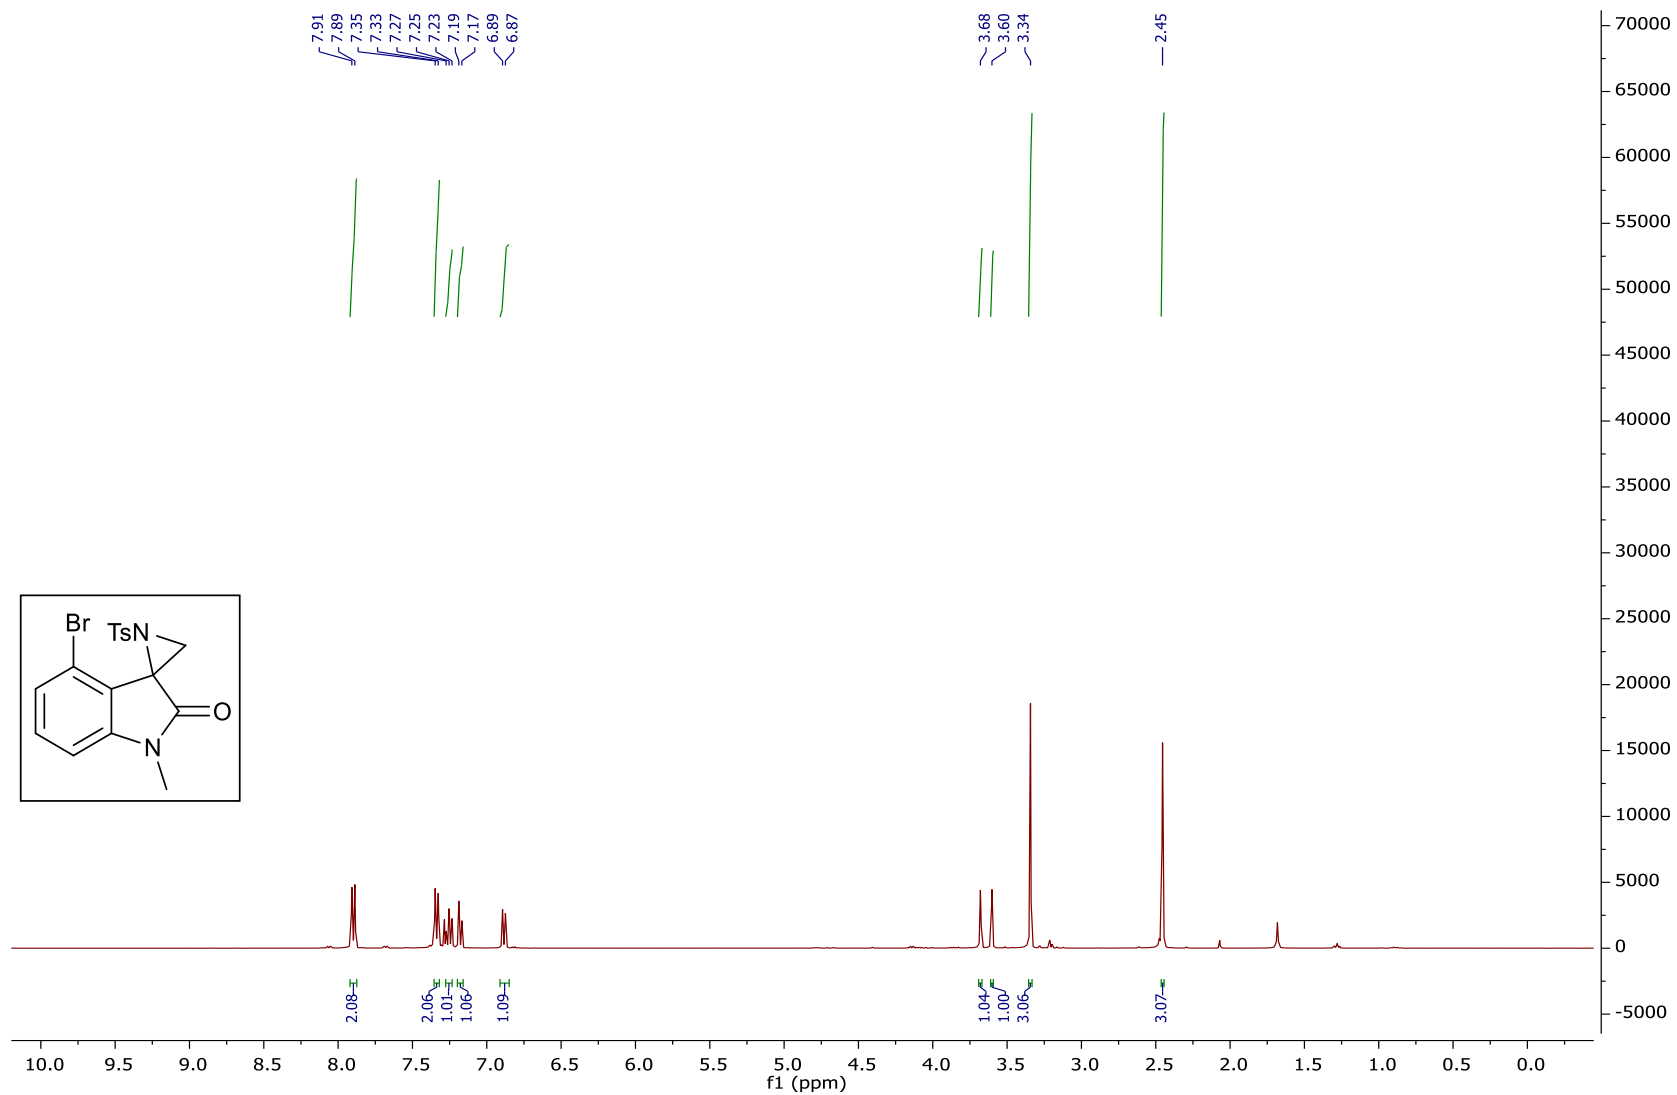

$^1\text{H}$  NMR spectrum of compound **1r** (400 MHz,  $\text{CDCl}_3$ )

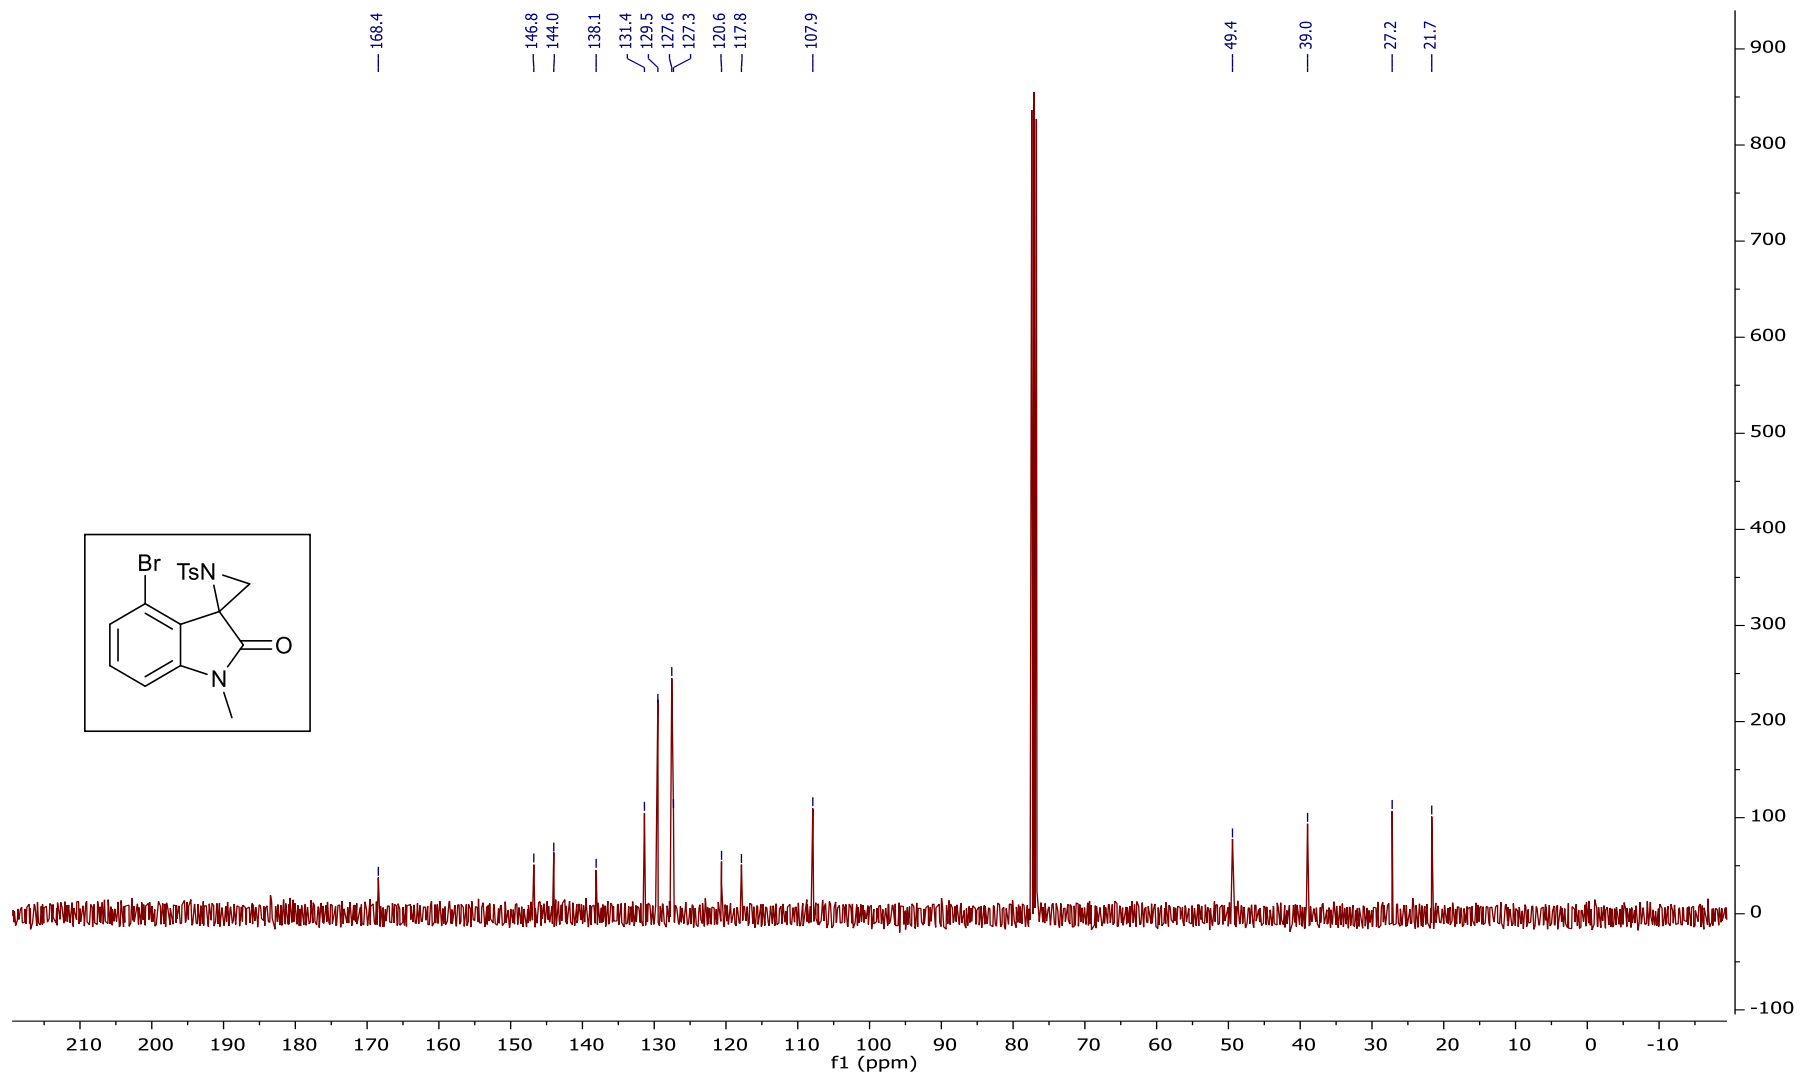

$^{13}\text{C}$  NMR spectrum of compound **1r** (100 MHz,  $\text{CDCl}_3$ )

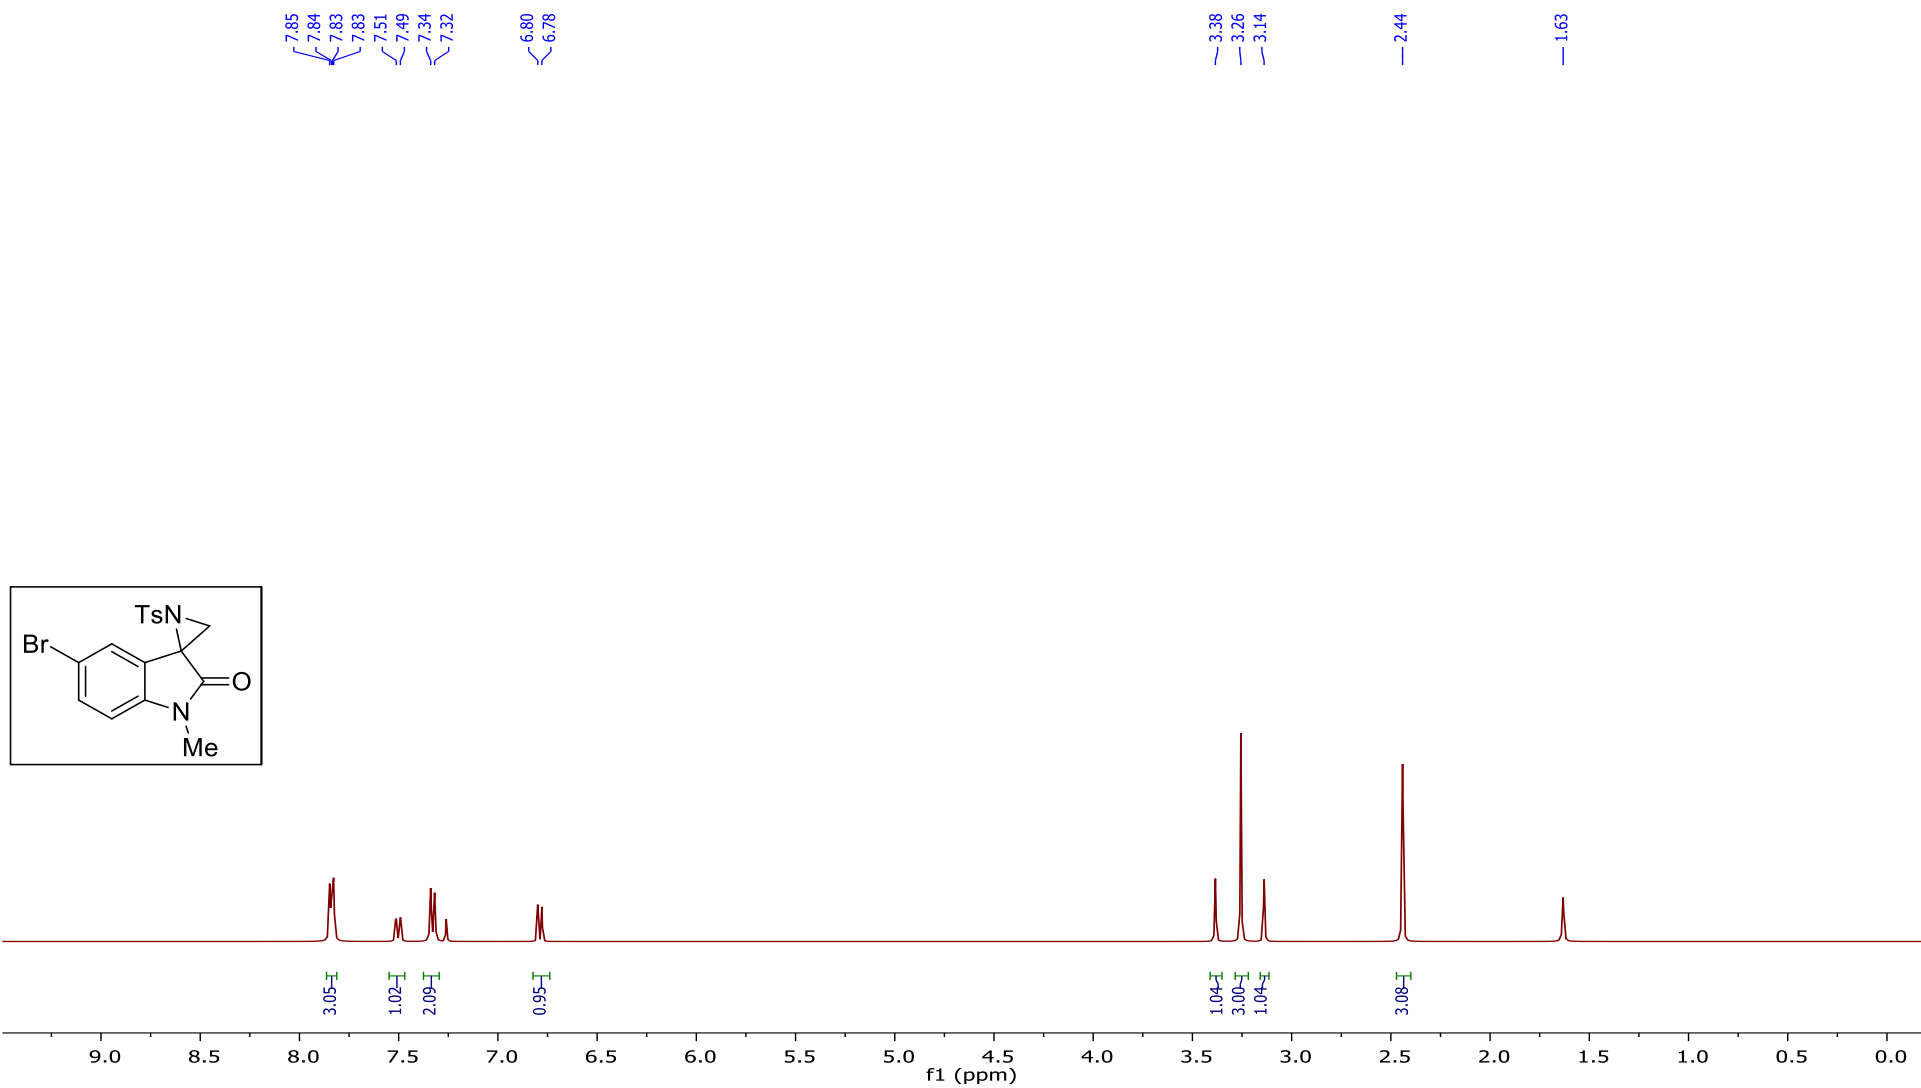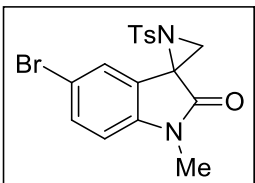

$^1\text{H}$  NMR spectrum of compound **1r'** (400 MHz,  $\text{CDCl}_3$ )

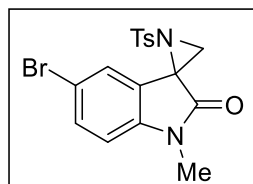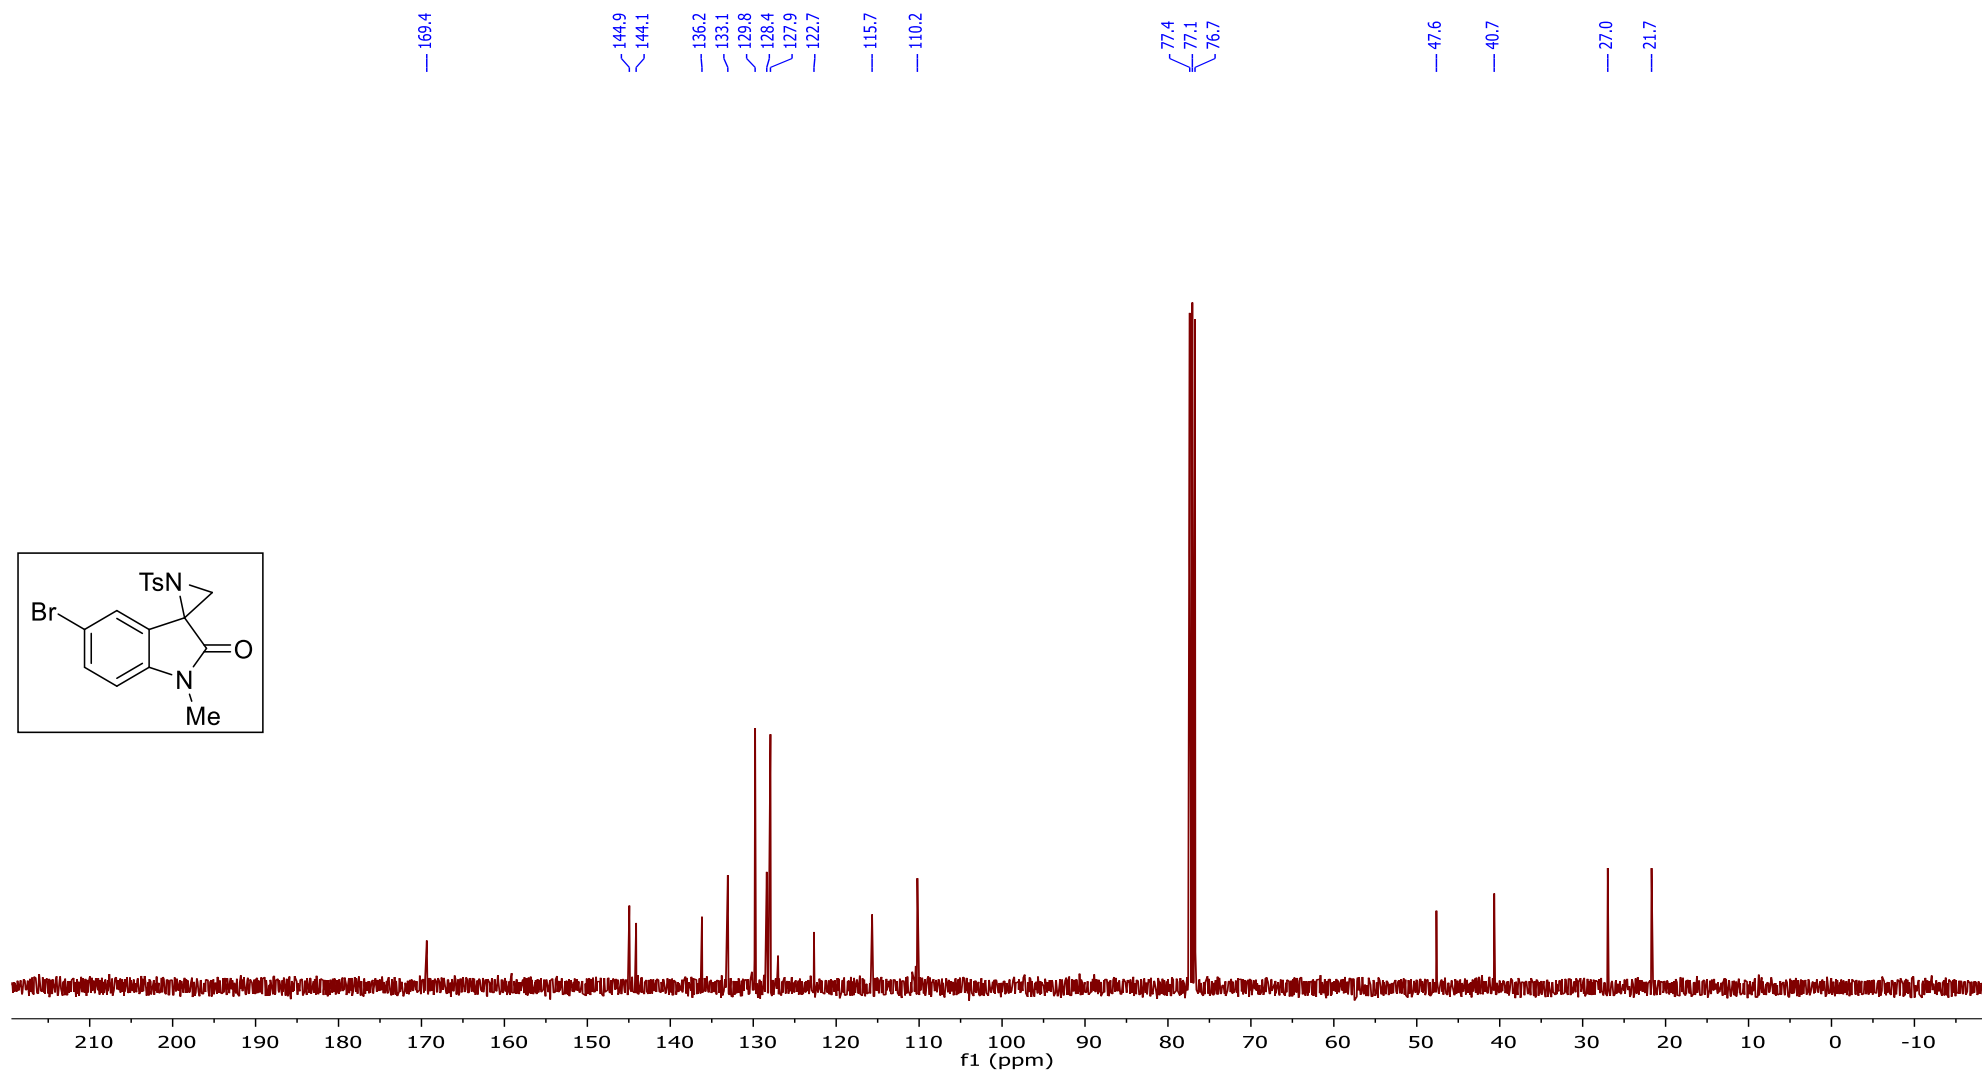

$^{13}\text{C}$  NMR spectrum of compound **1r'** (100 MHz,  $\text{CDCl}_3$ )

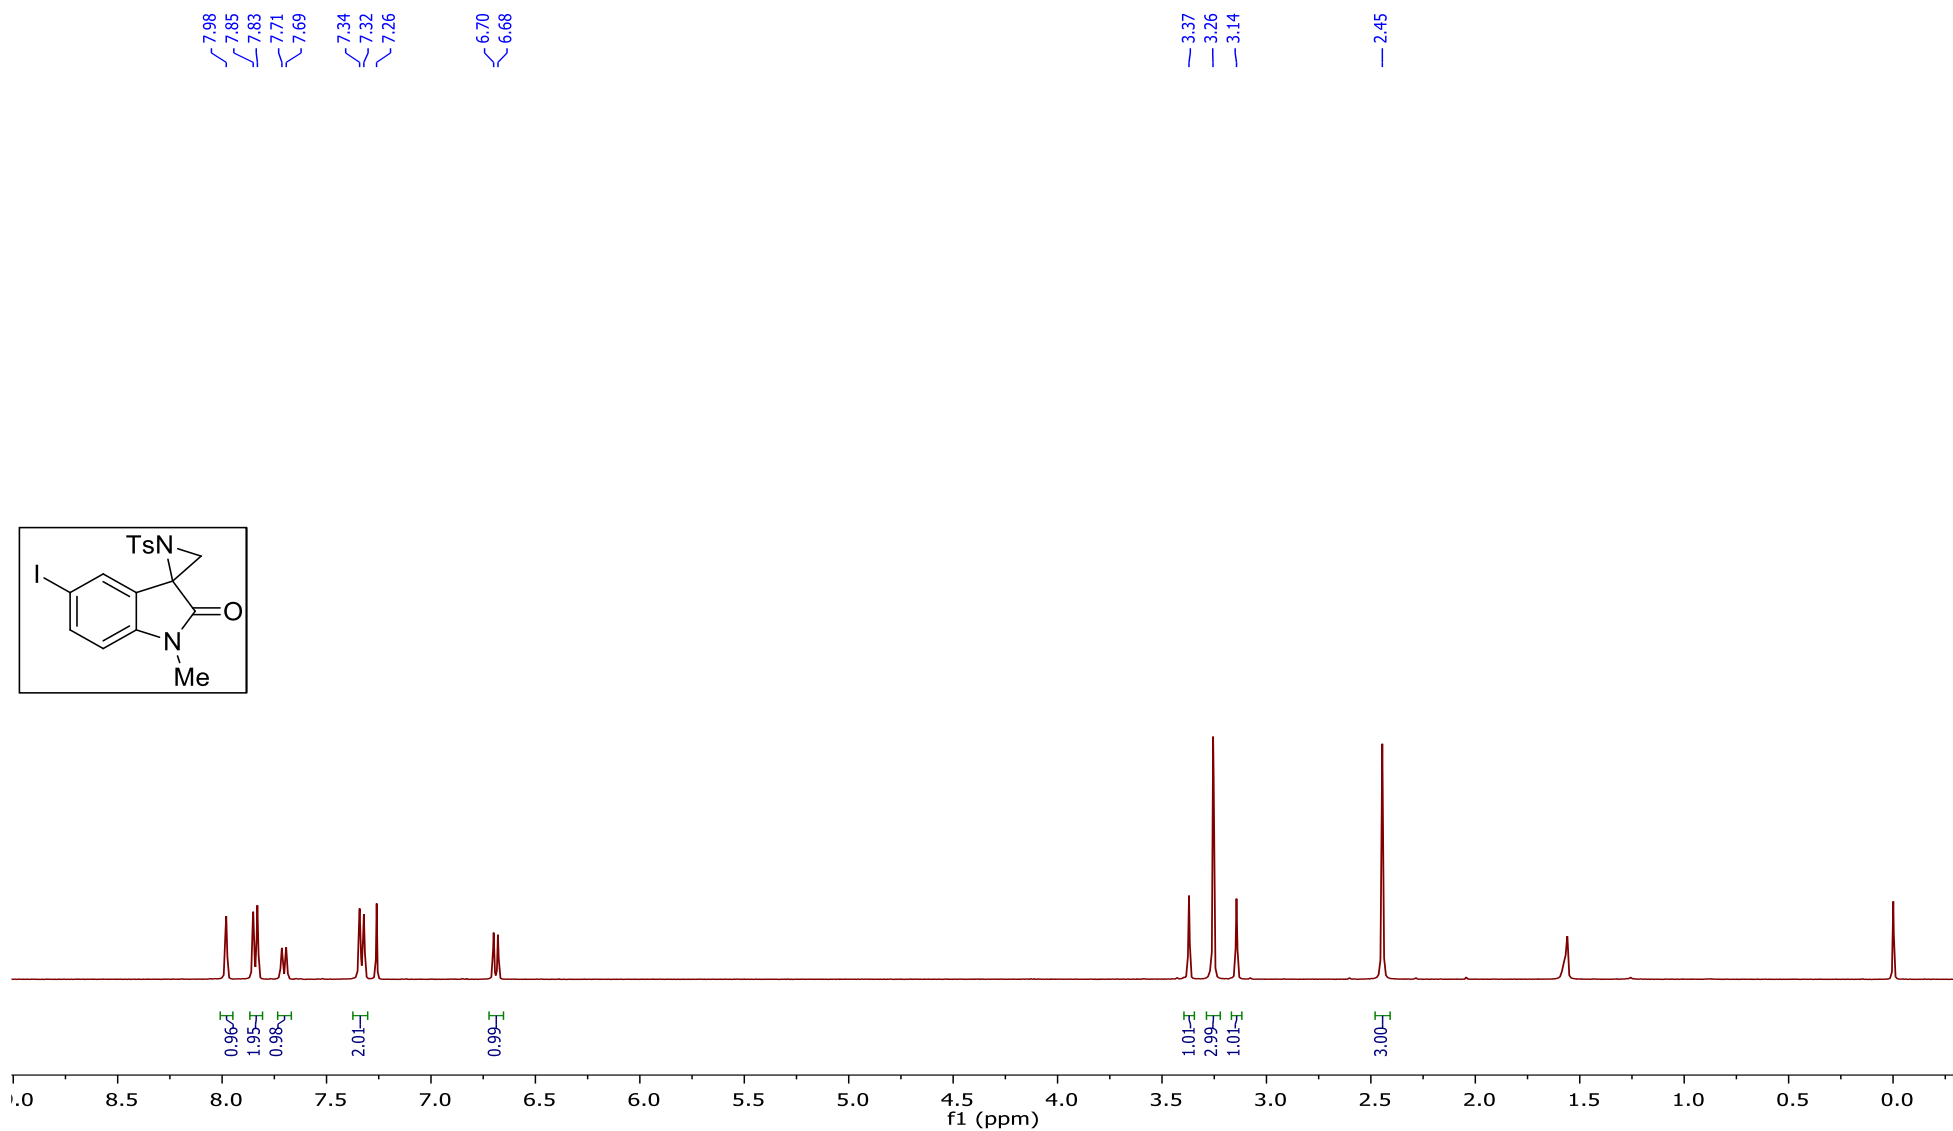

$^1\text{H}$  NMR spectrum of compound **1s** (400 MHz,  $\text{CDCl}_3$ )



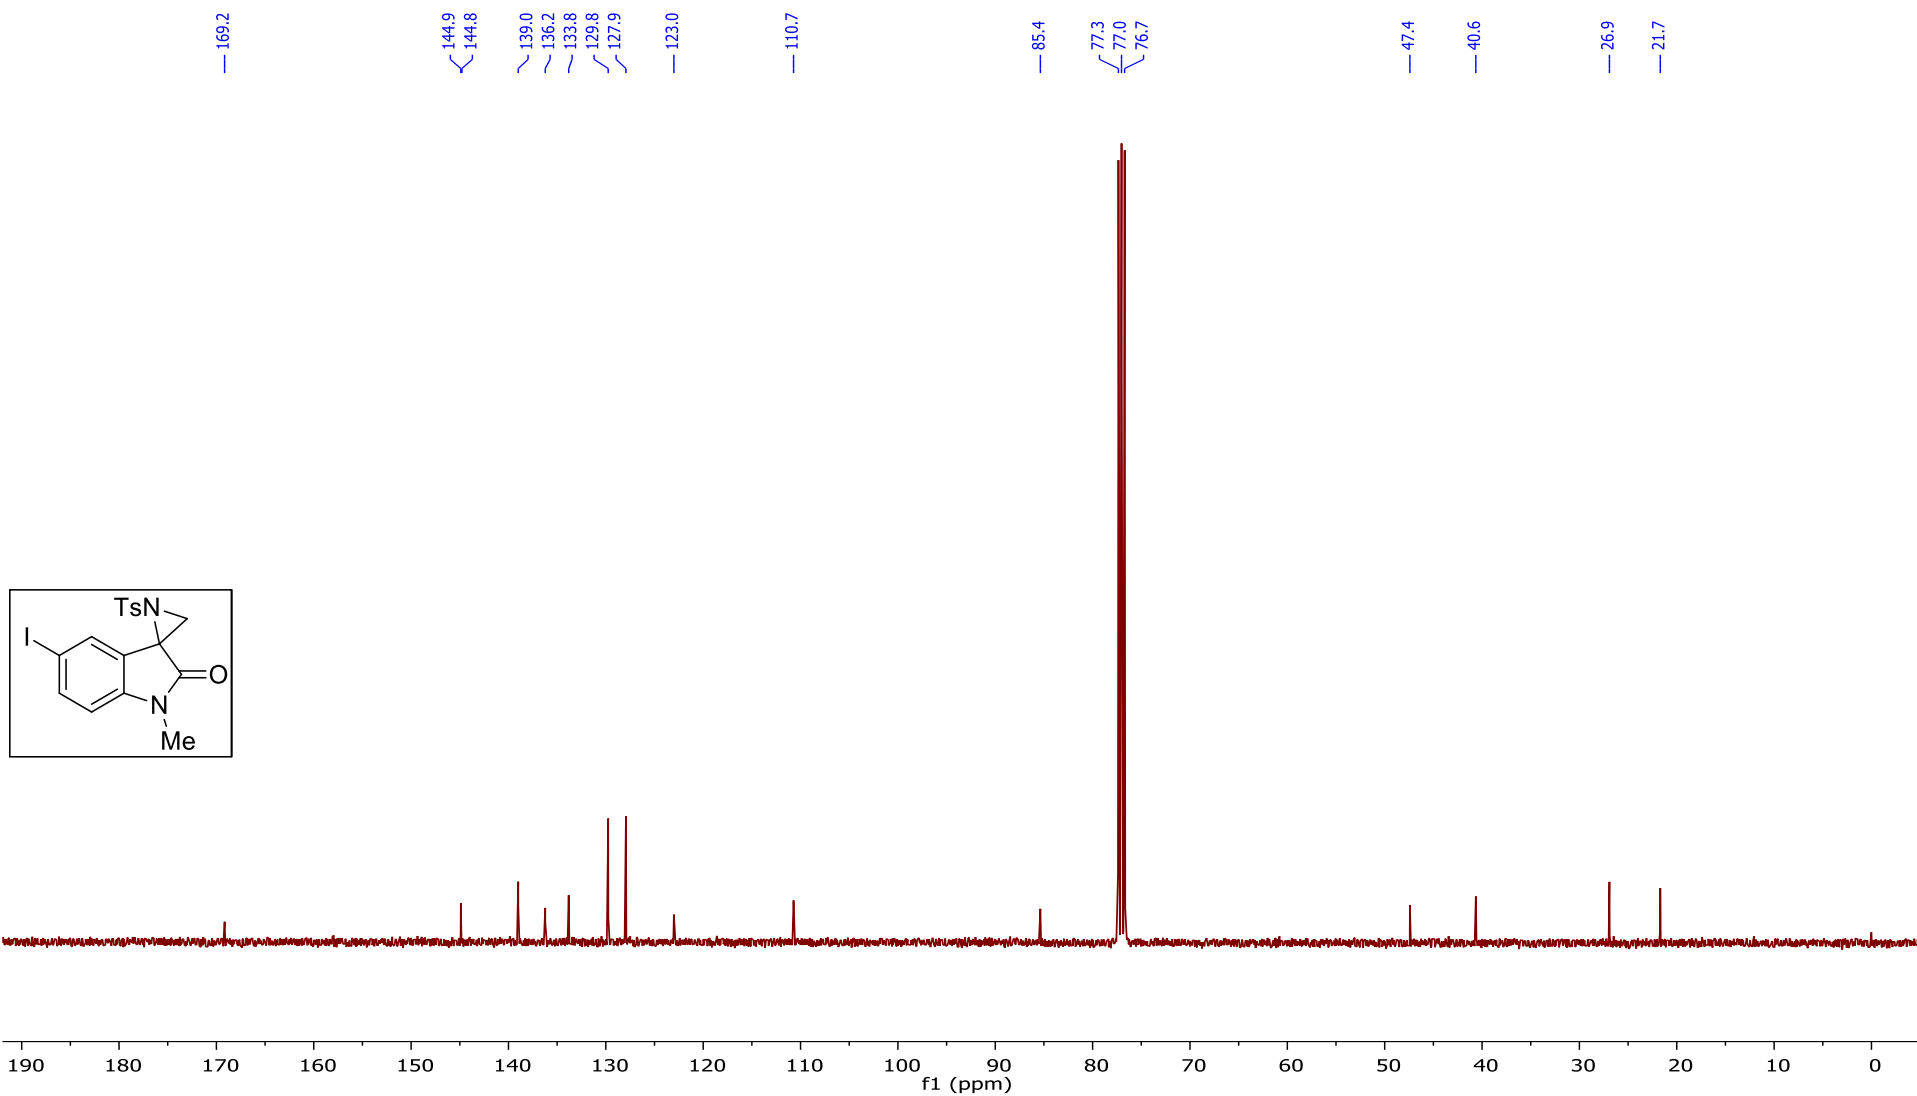

$^{13}\text{C}$  NMR spectrum of compound **1s** (100 MHz,  $\text{CDCl}_3$ )

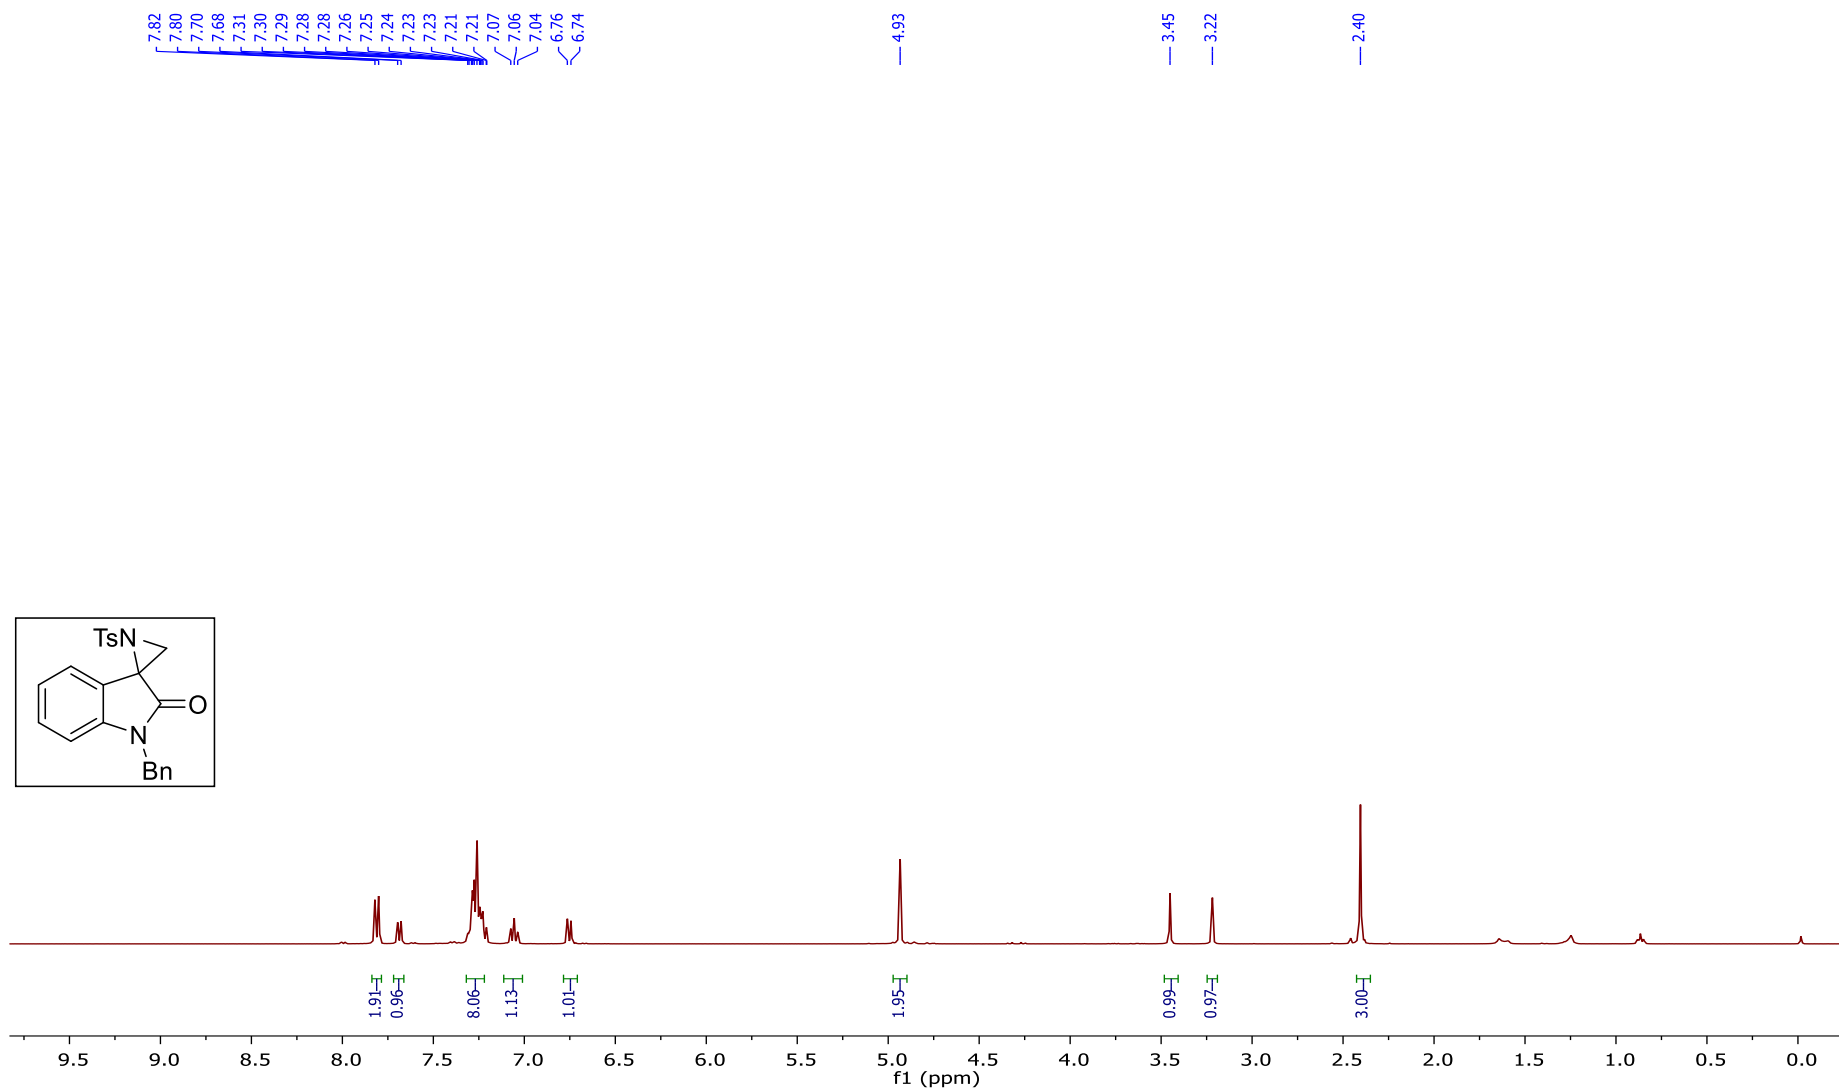

<sup>1</sup>H NMR spectrum of compound **1t** (400 MHz, CDCl<sub>3</sub>)

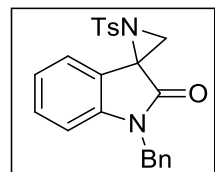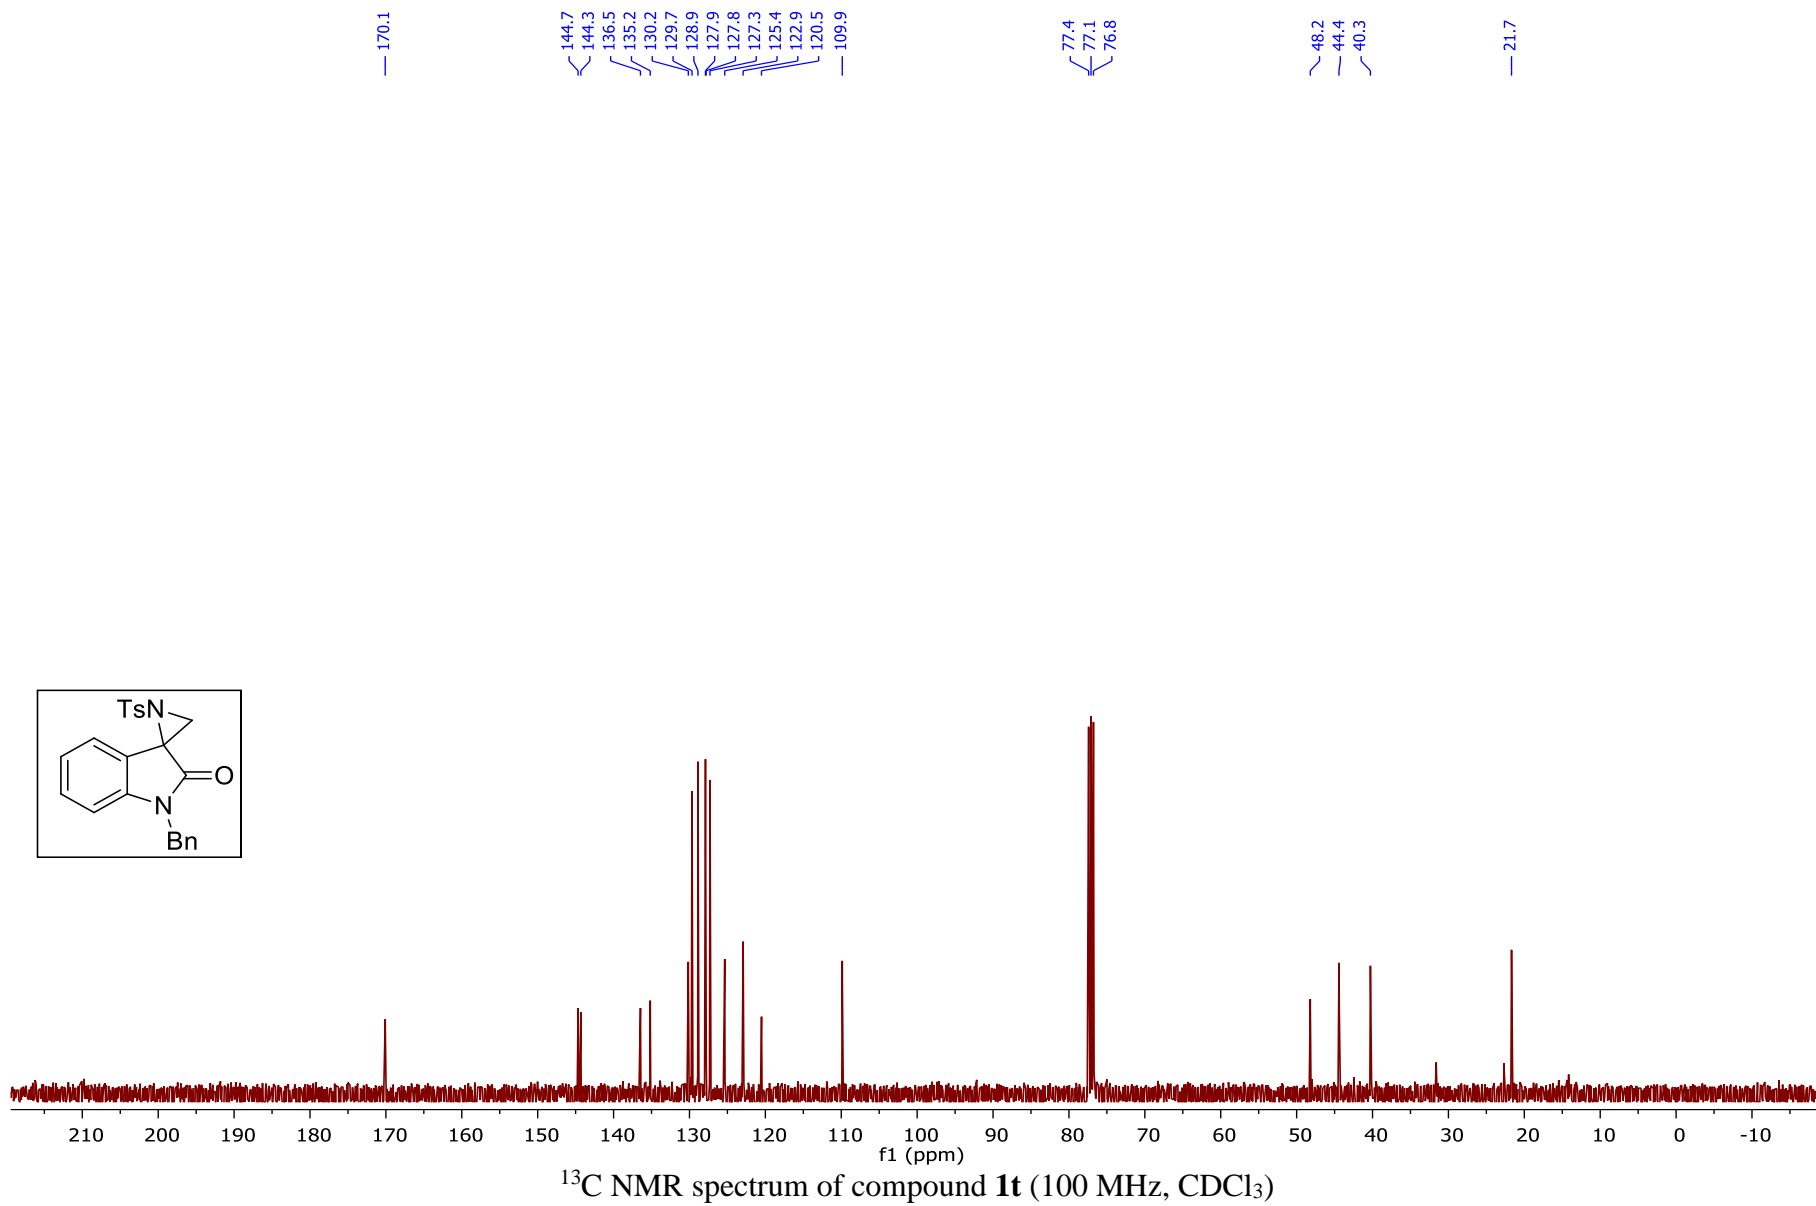

S35

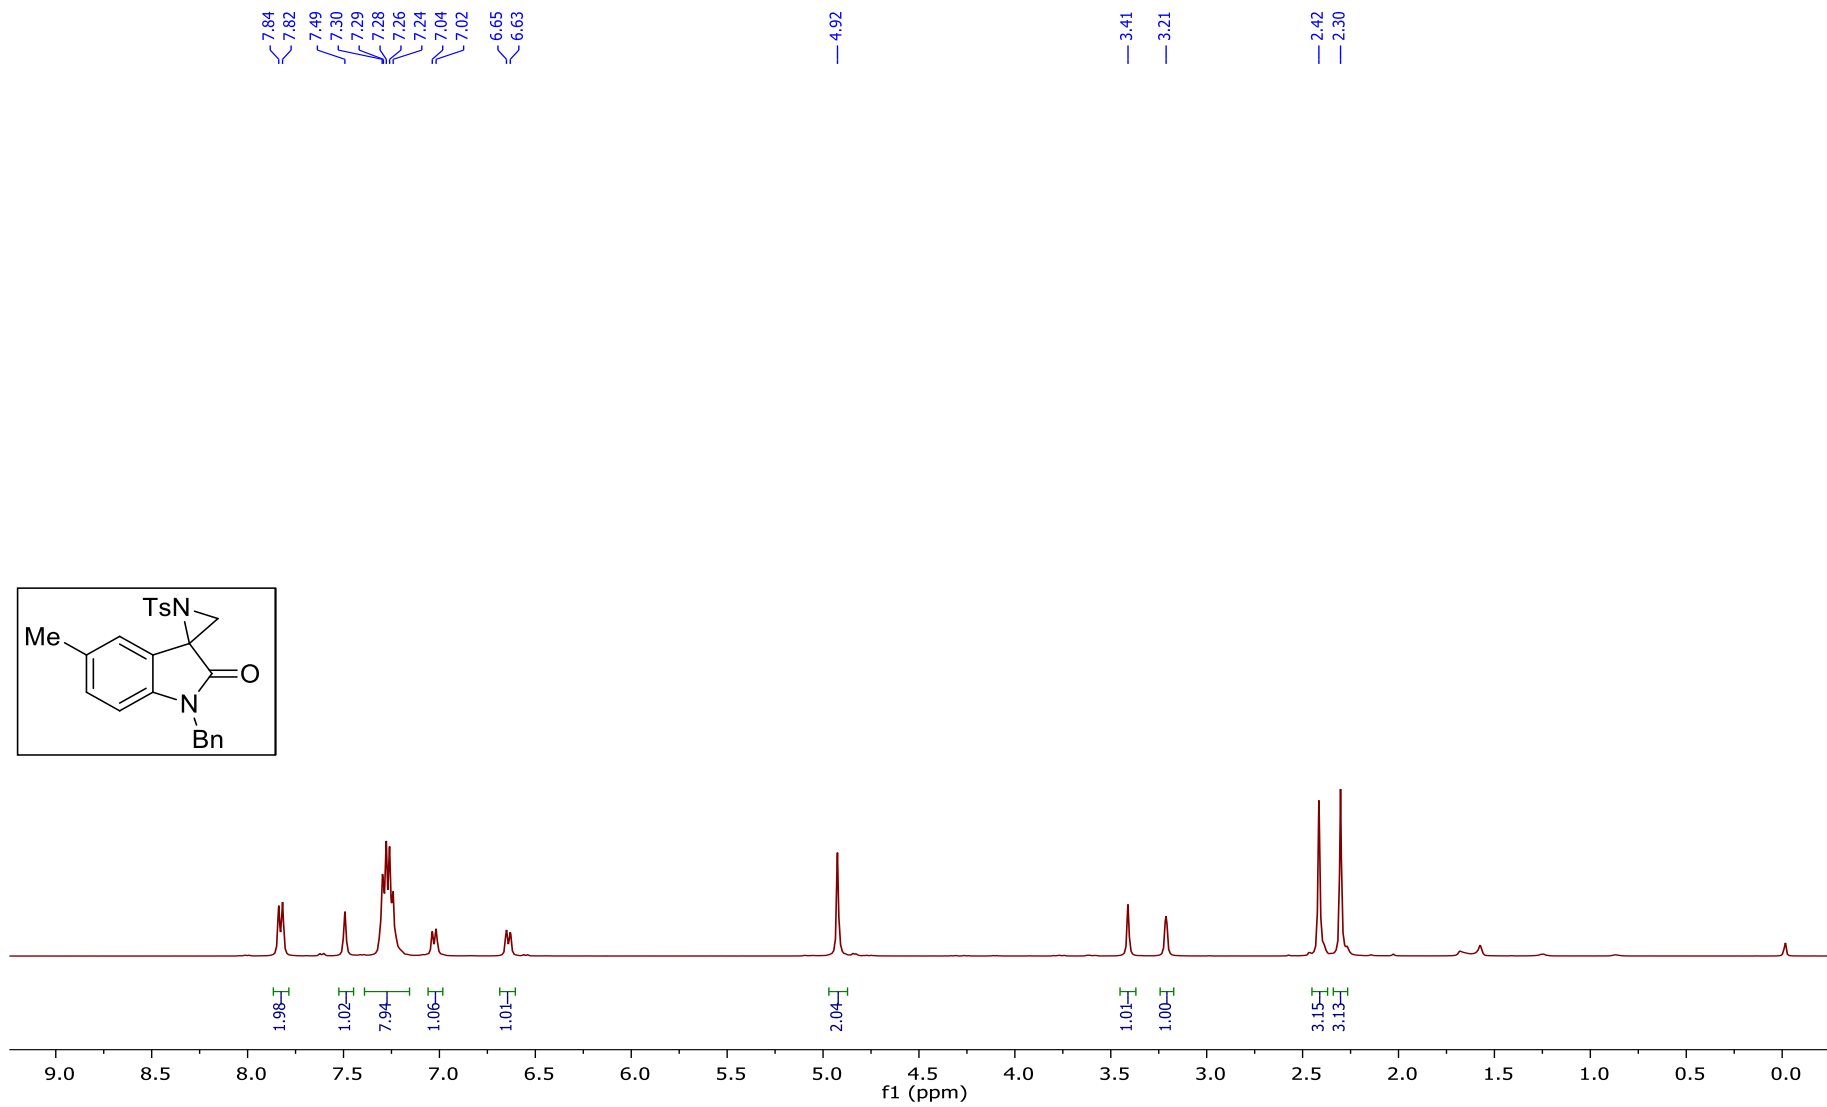

<sup>1</sup>H NMR spectrum of compound **1u** (400 MHz, CDCl<sub>3</sub>)

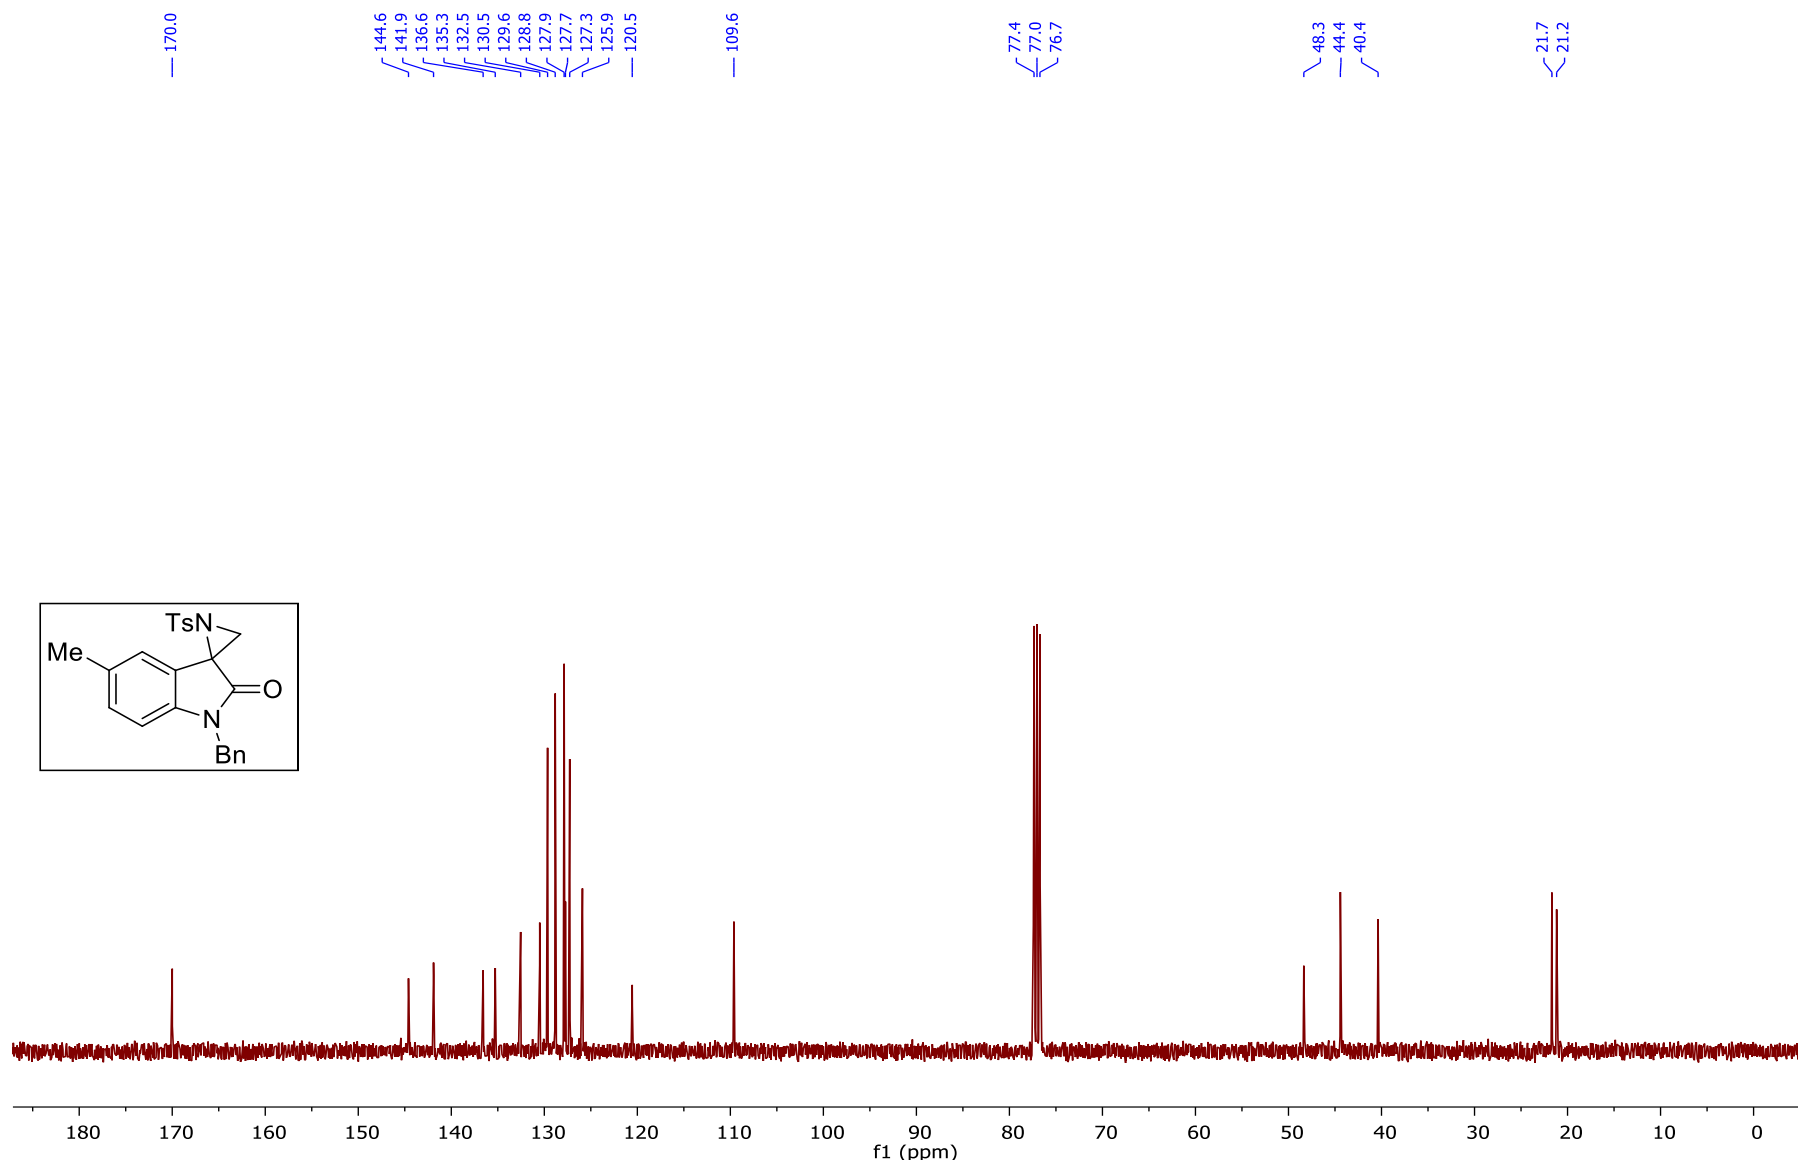

<sup>13</sup>C NMR spectrum of compound **1u** (100 MHz, CDCl<sub>3</sub>)

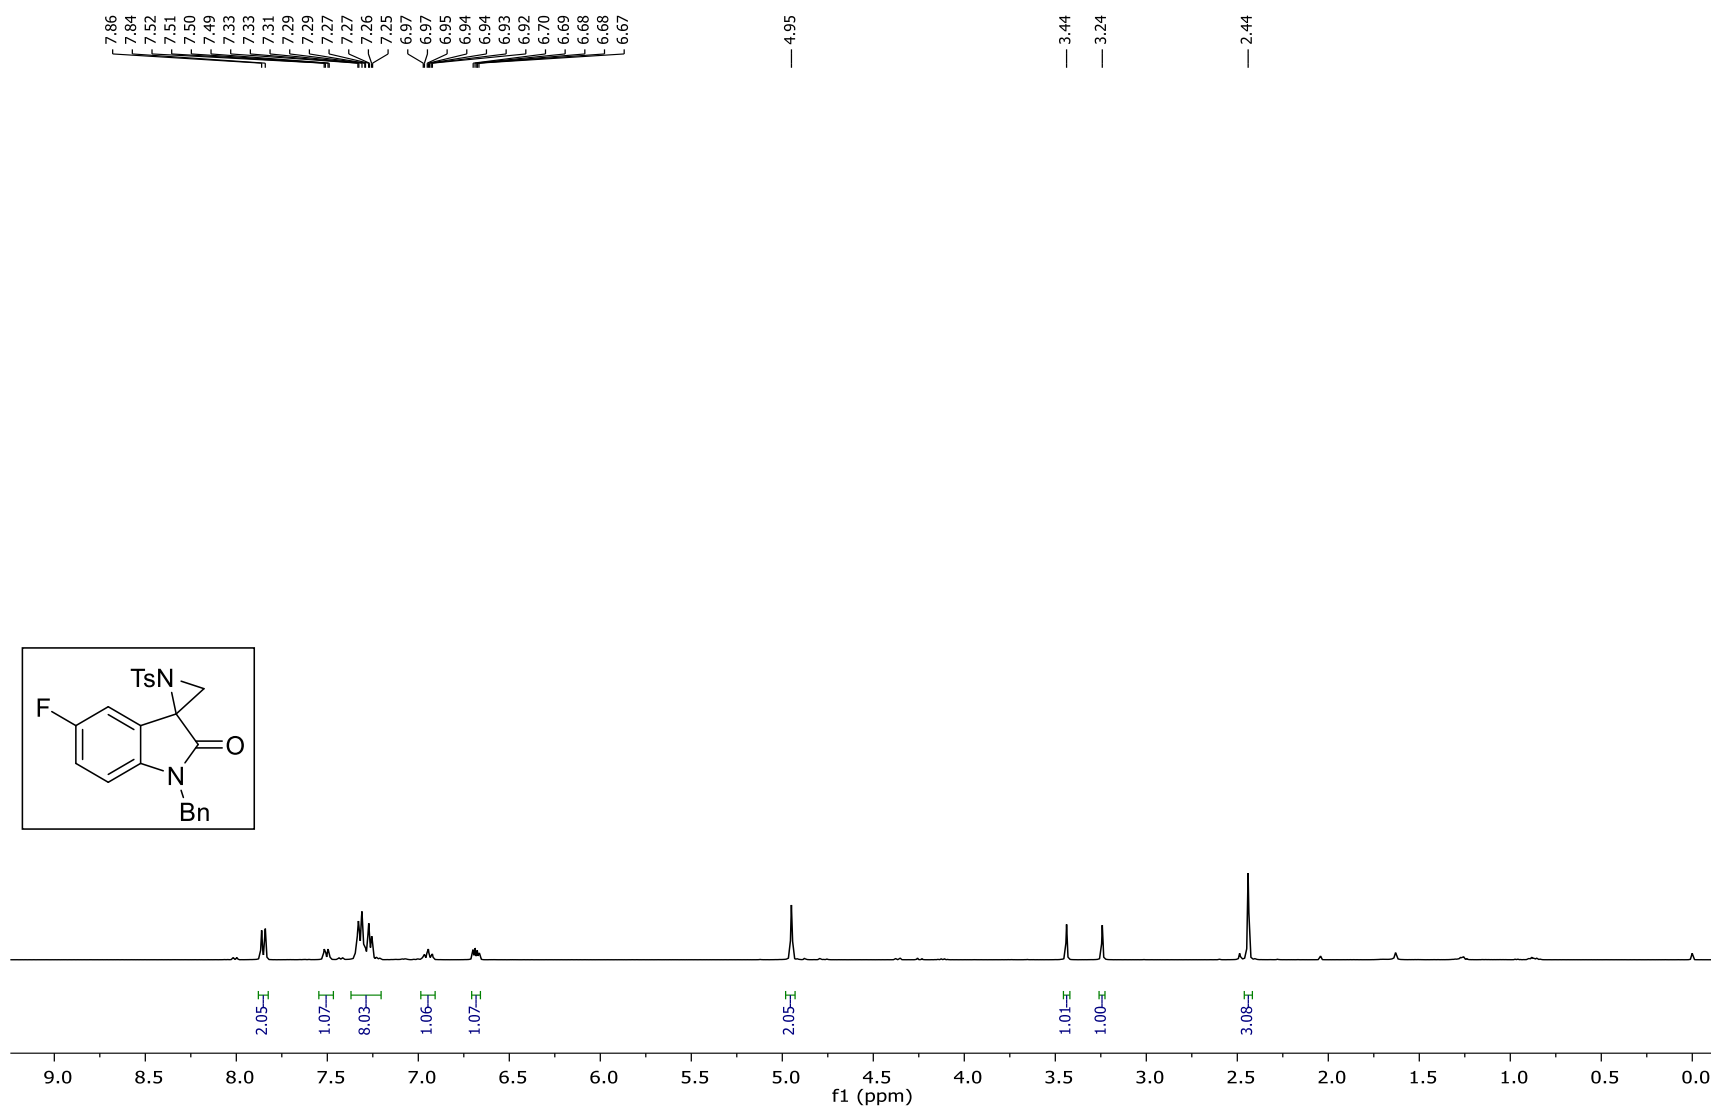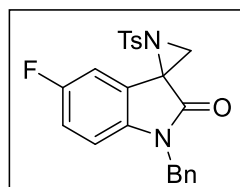

<sup>1</sup>H NMR spectrum of compound **1v** (400 MHz, CDCl<sub>3</sub>)

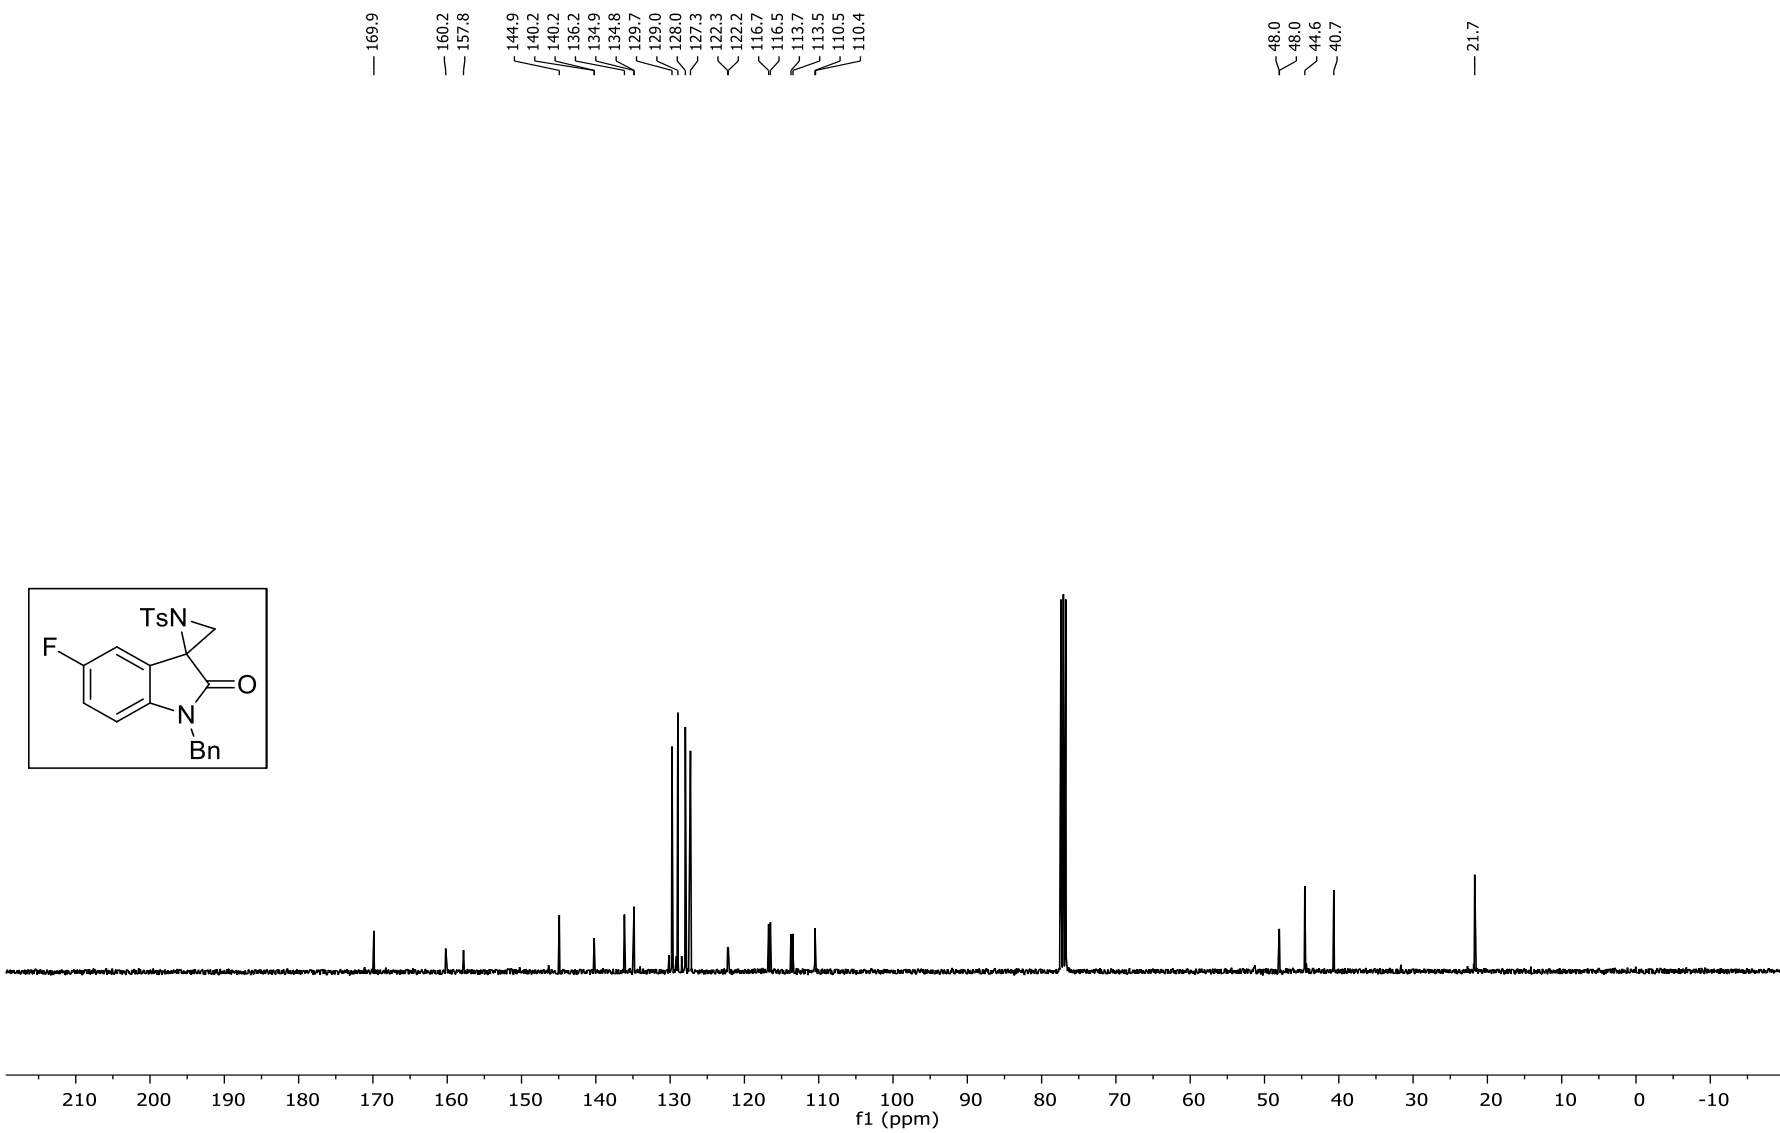

$^{13}\text{C}$  NMR spectrum of compound **1v** (100 MHz,  $\text{CDCl}_3$ )

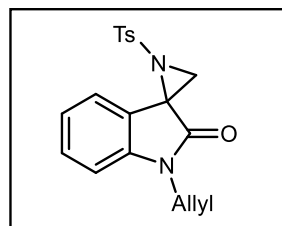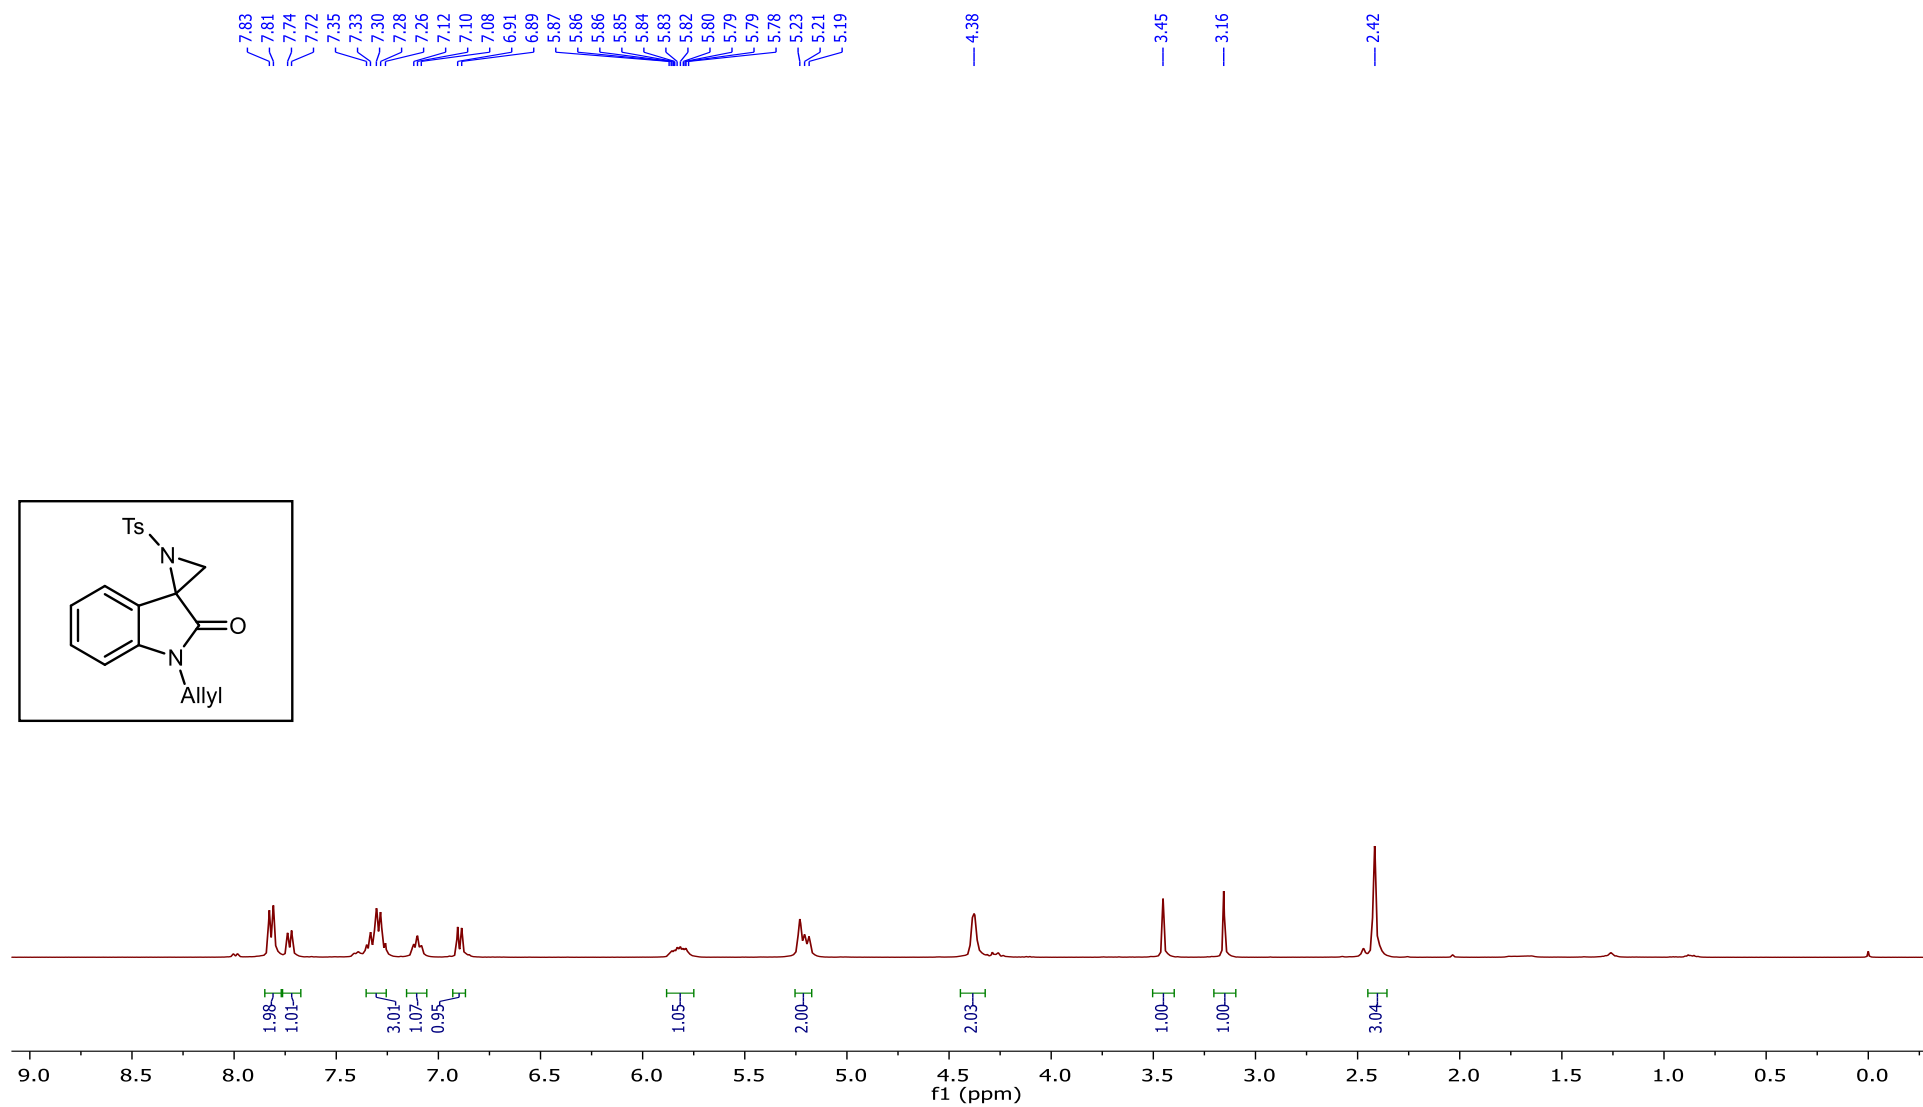

$^1\text{H}$  NMR spectrum of compound **1w** (400 MHz,  $\text{CDCl}_3$ )



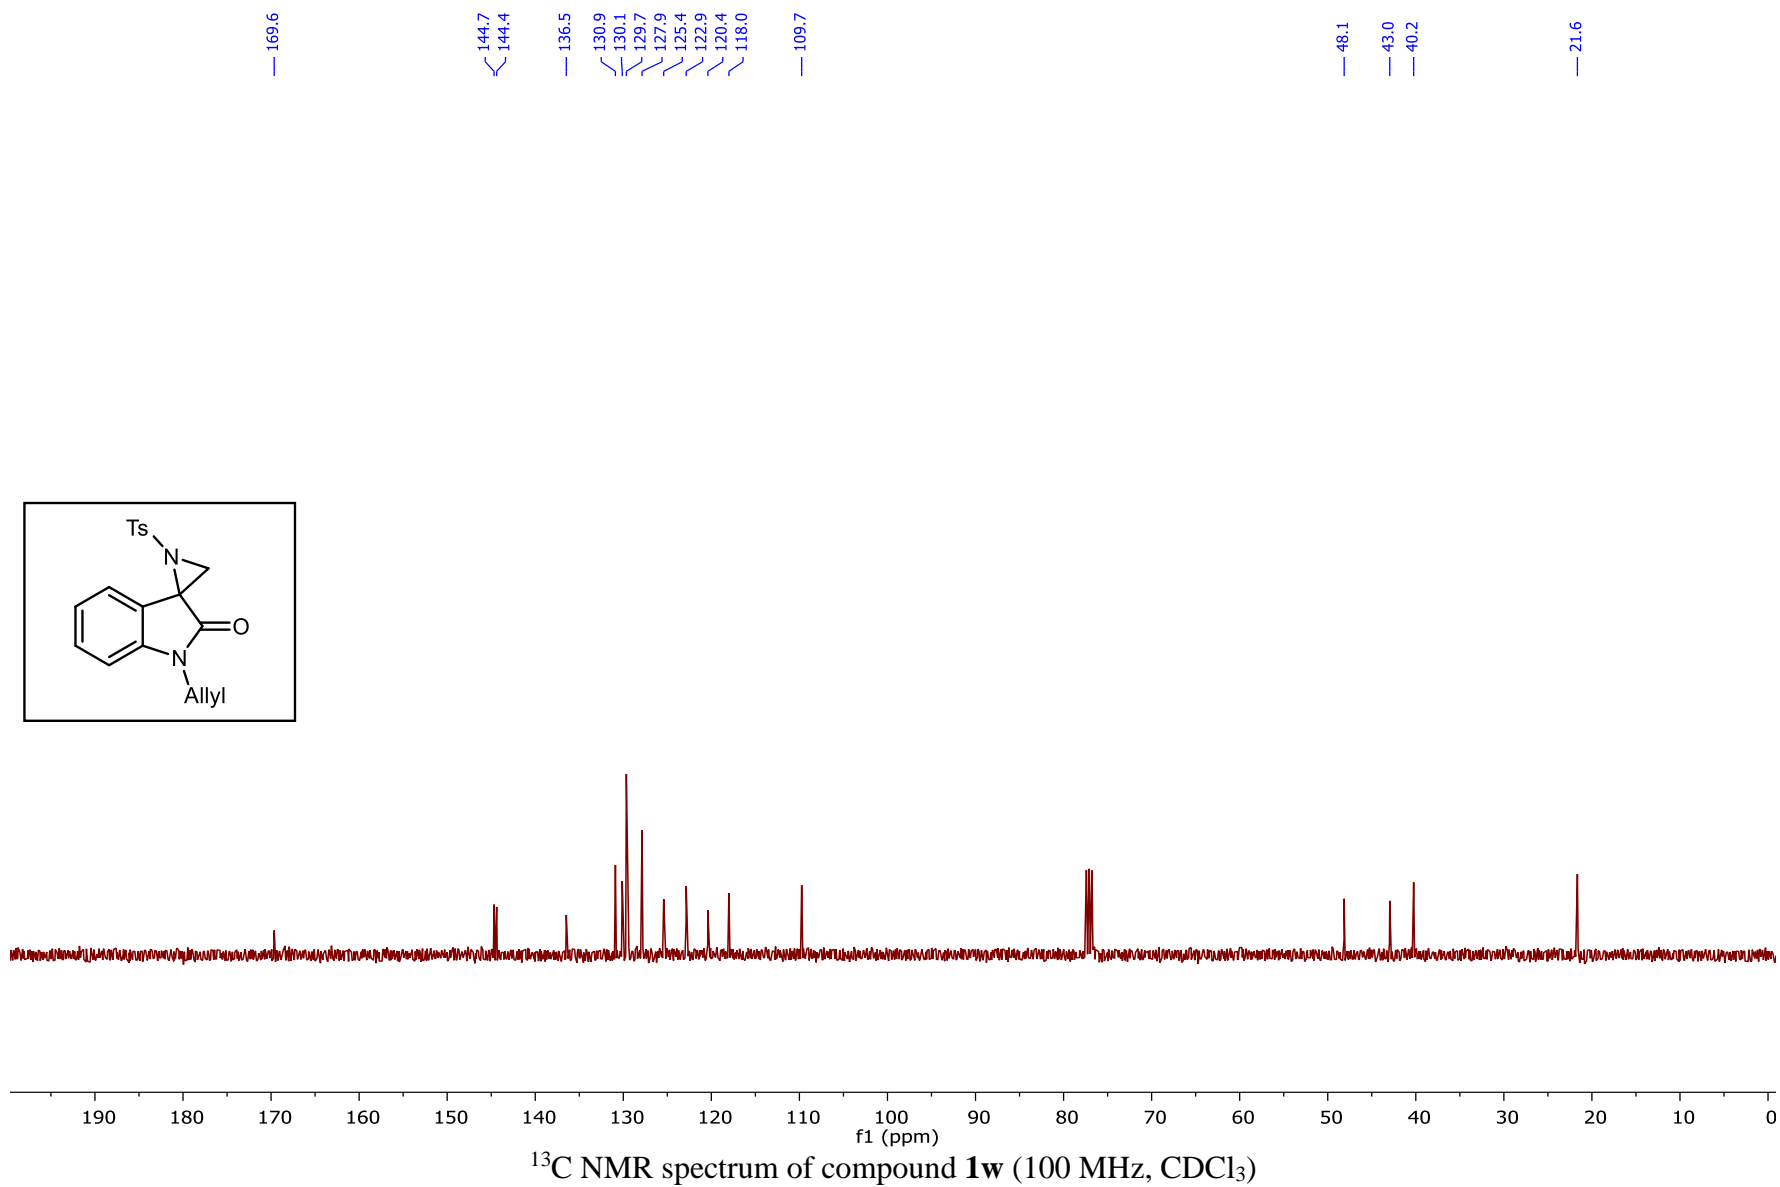

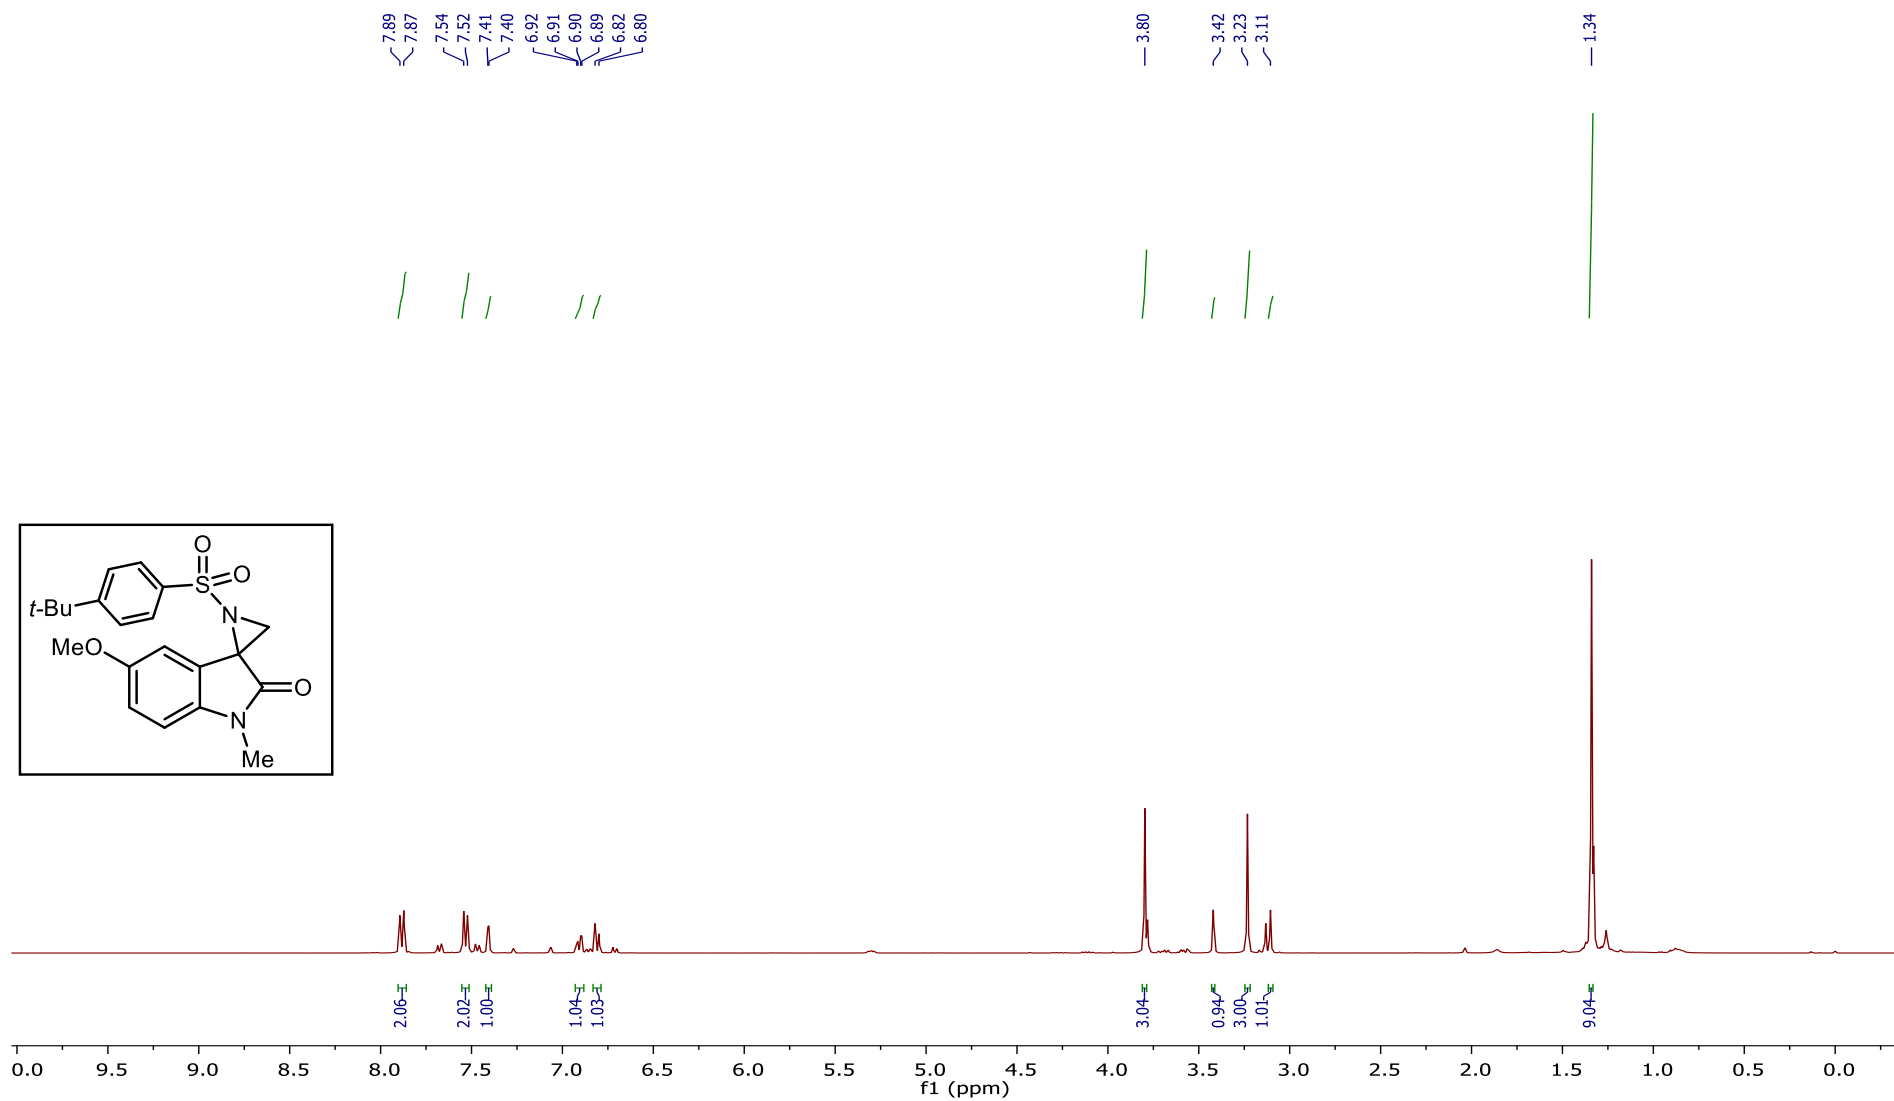

<sup>1</sup>H NMR spectrum of compound **1x** (400 MHz, CDCl<sub>3</sub>)

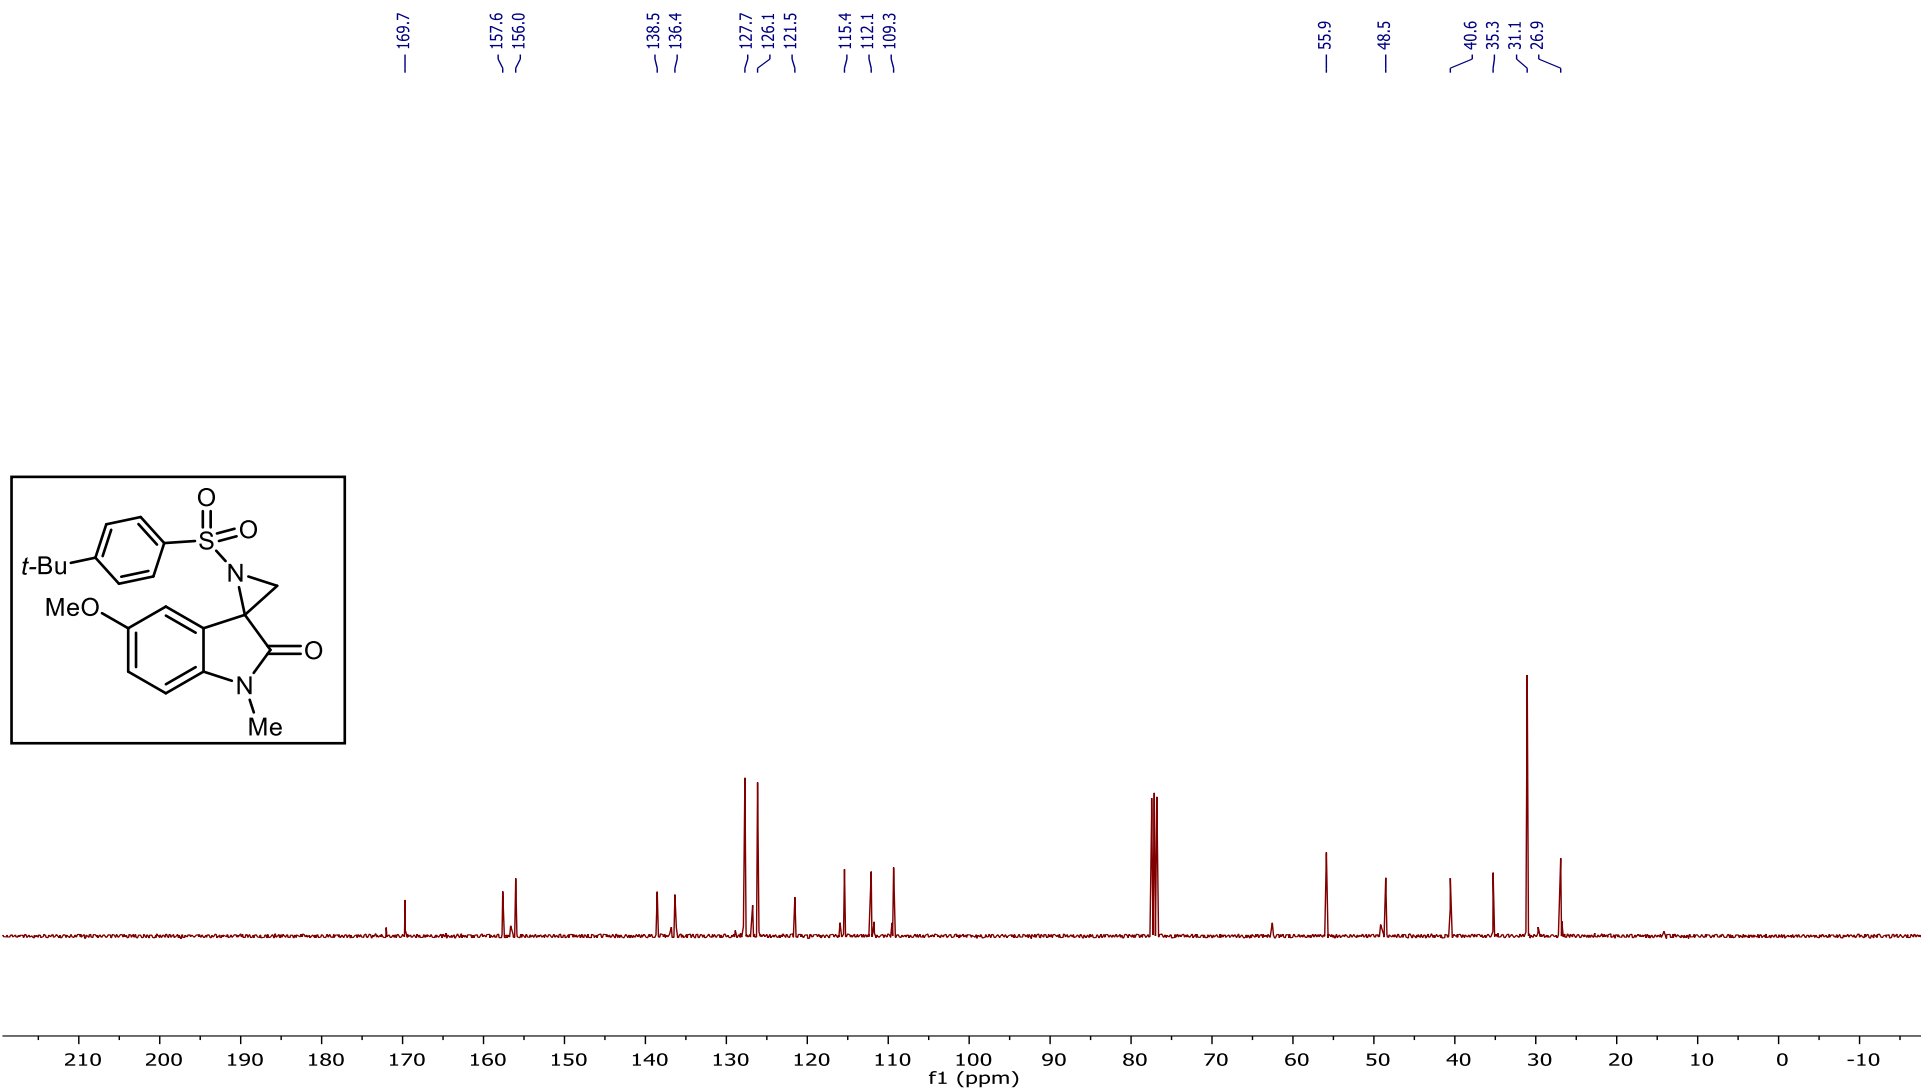

<sup>13</sup>C NMR spectrum of compound **1x** (100 MHz, CDCl<sub>3</sub>)

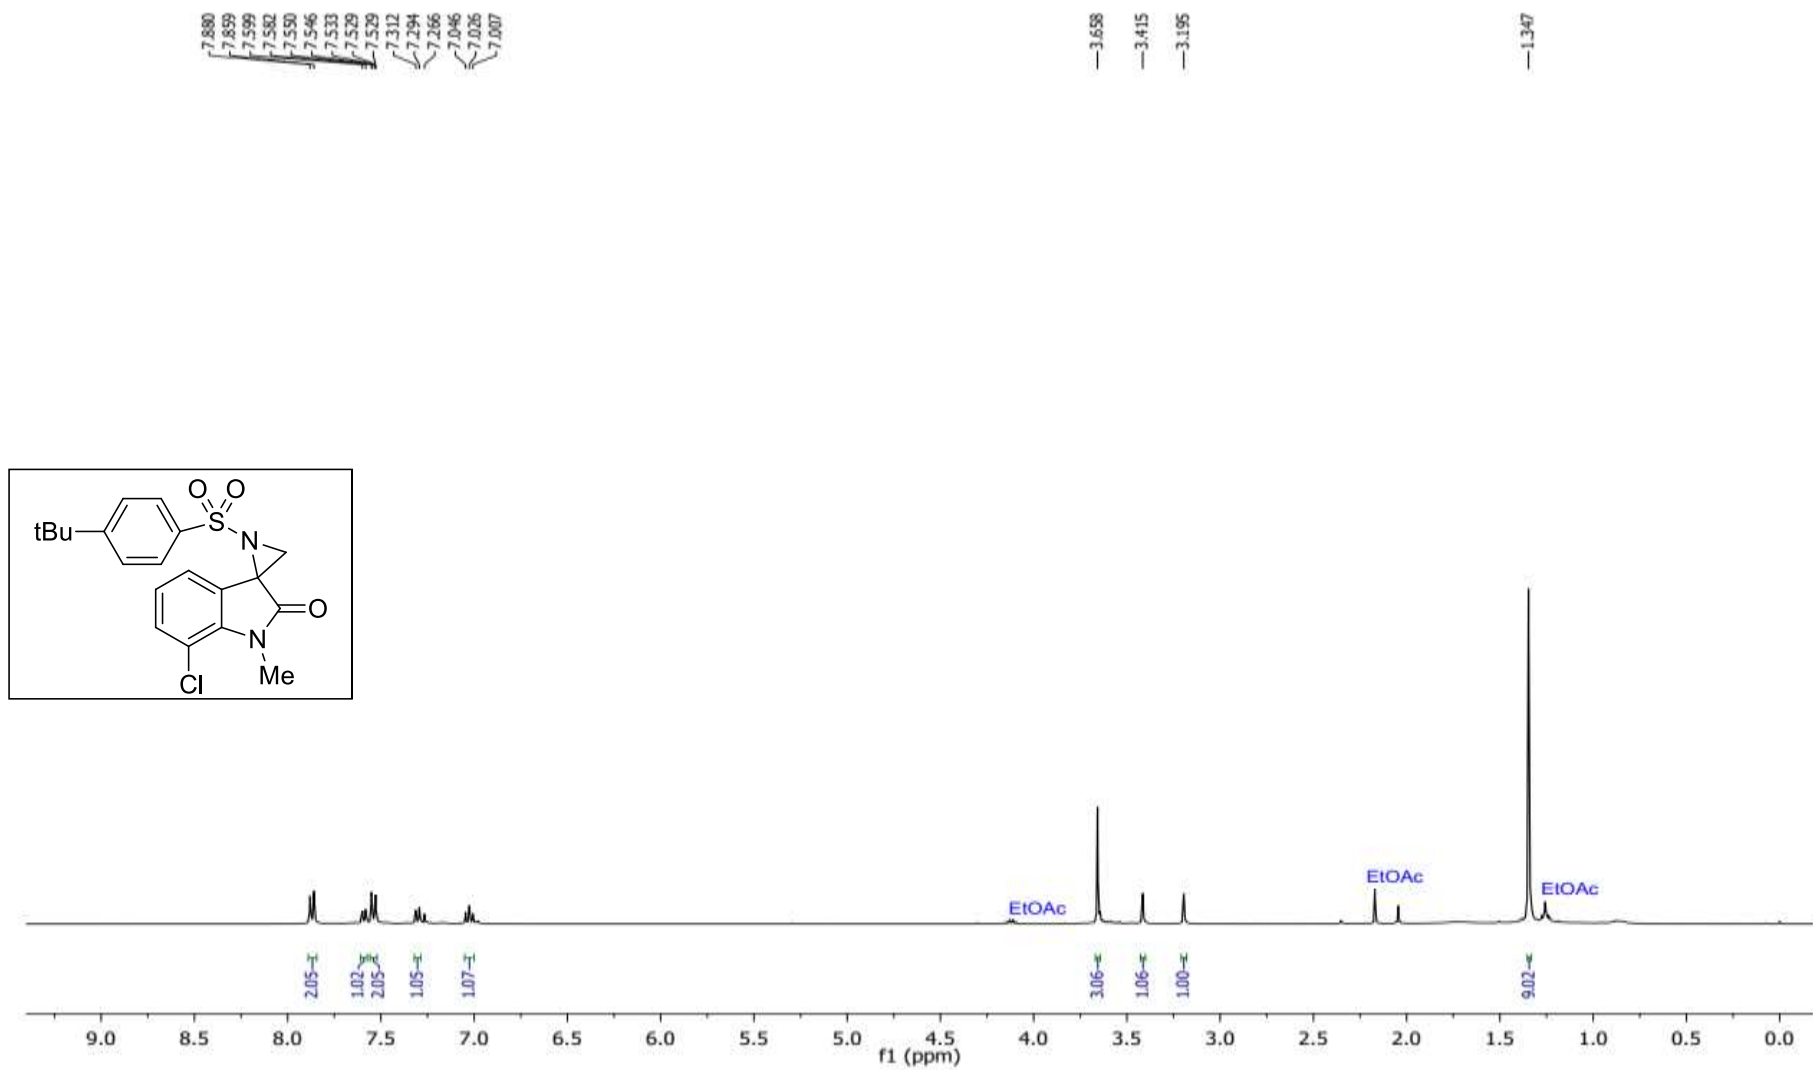

<sup>1</sup>H NMR spectrum of compound **1y** (400 MHz, CDCl<sub>3</sub>)

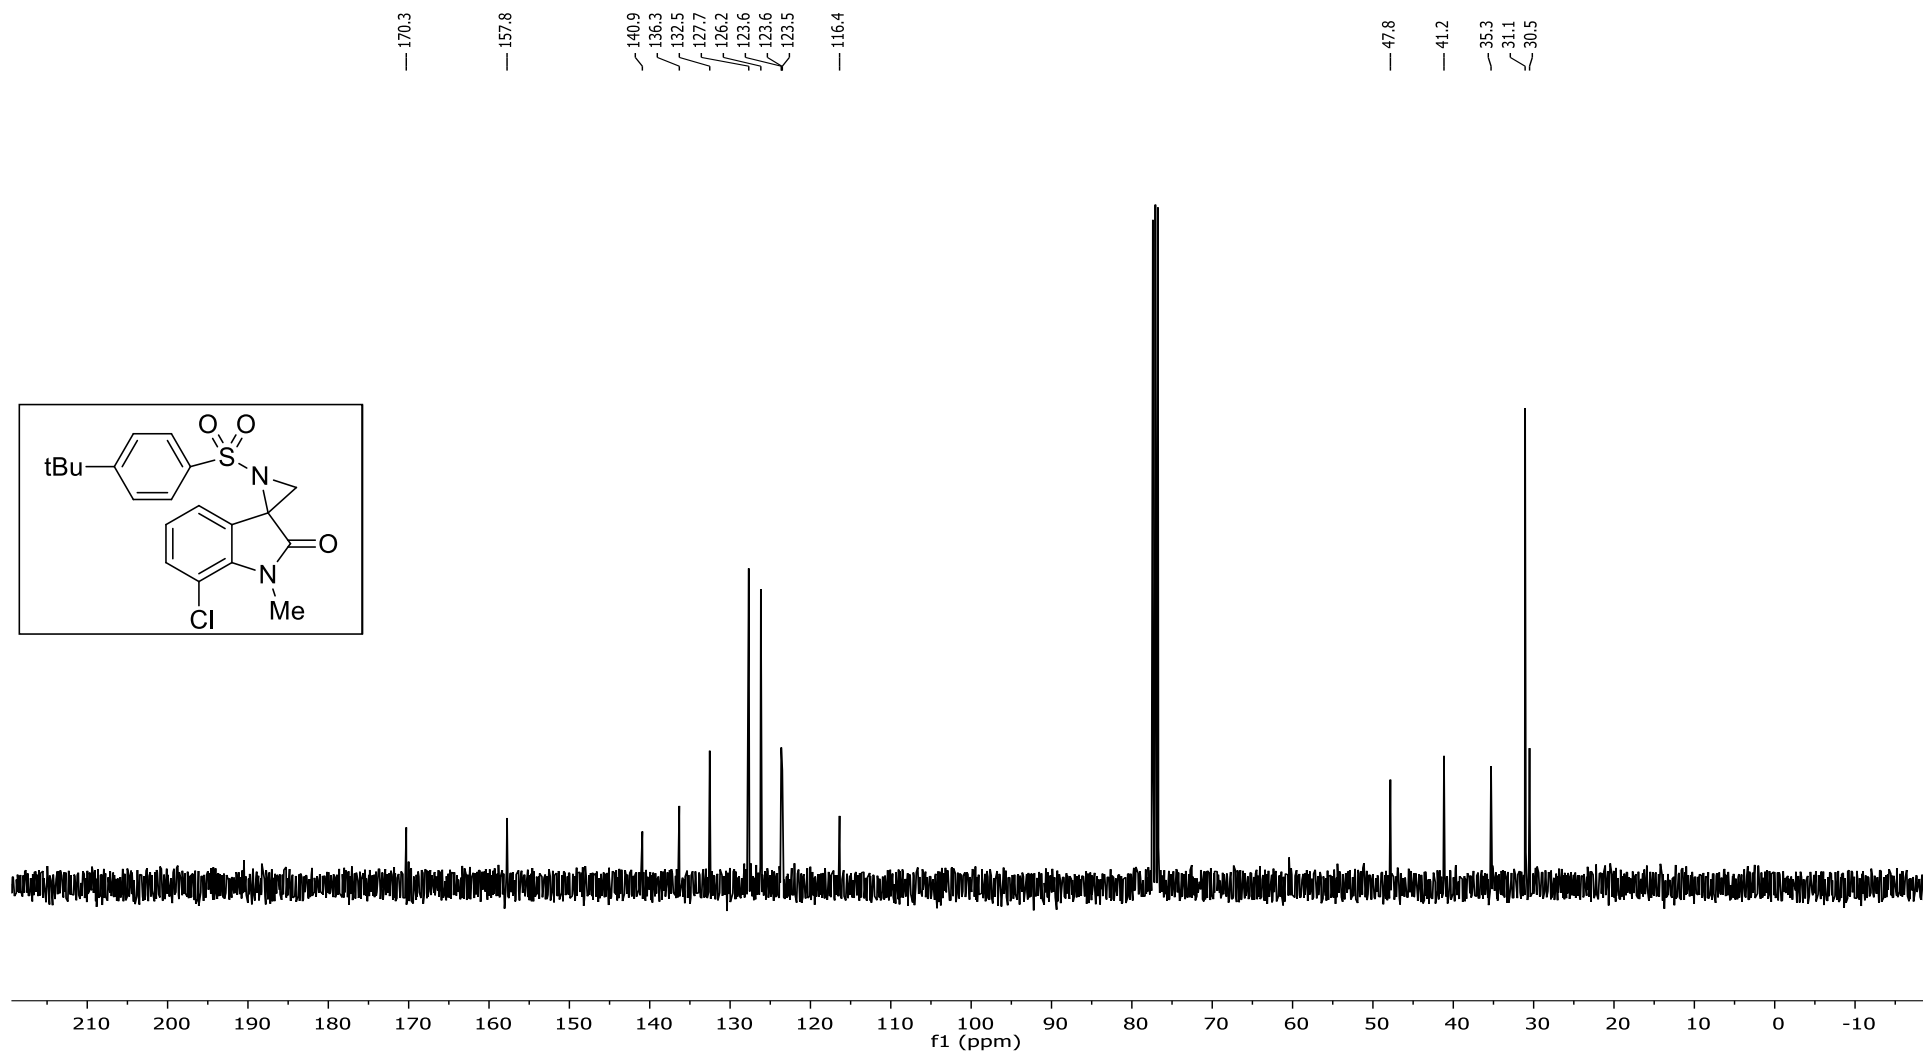

<sup>13</sup>C NMR spectrum of compound **1y** (100 MHz, CDCl<sub>3</sub>)

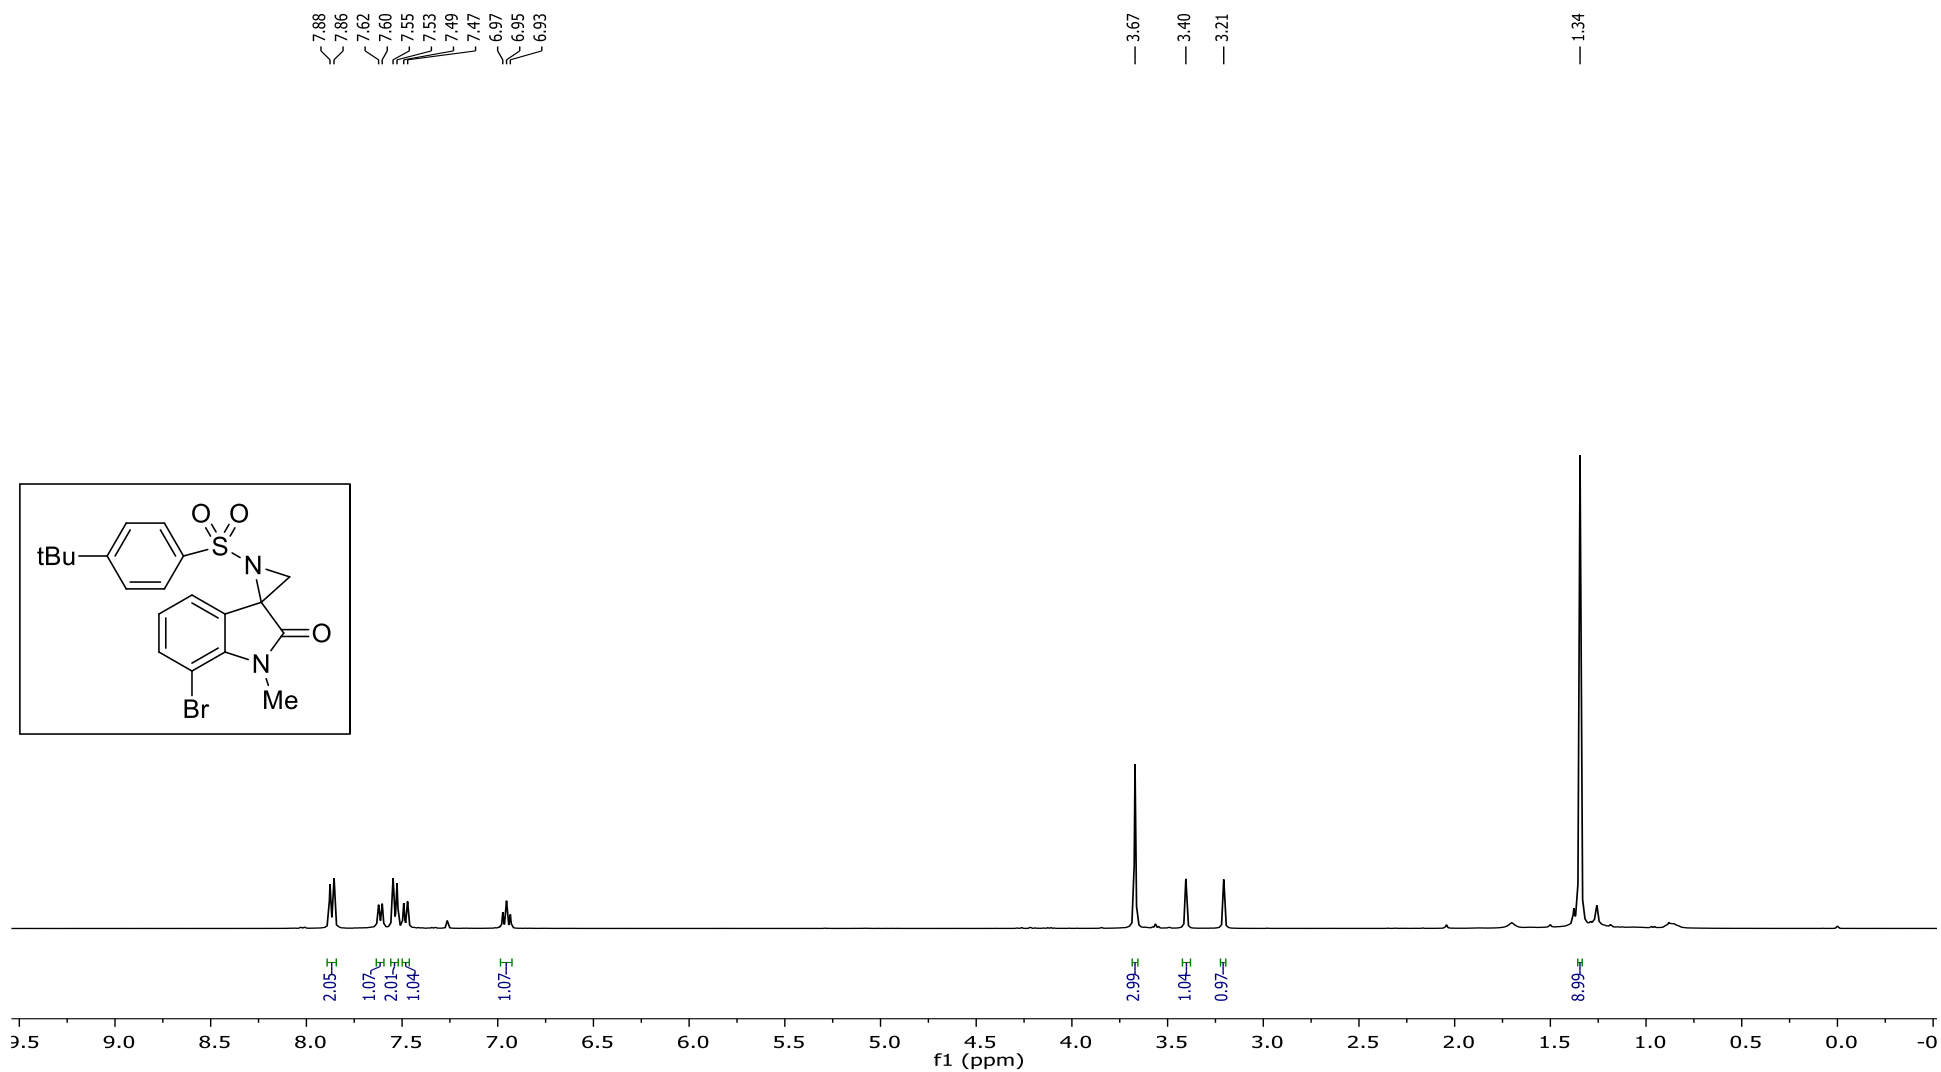

<sup>1</sup>H NMR spectrum of compound **1z** (400 MHz, CDCl<sub>3</sub>)

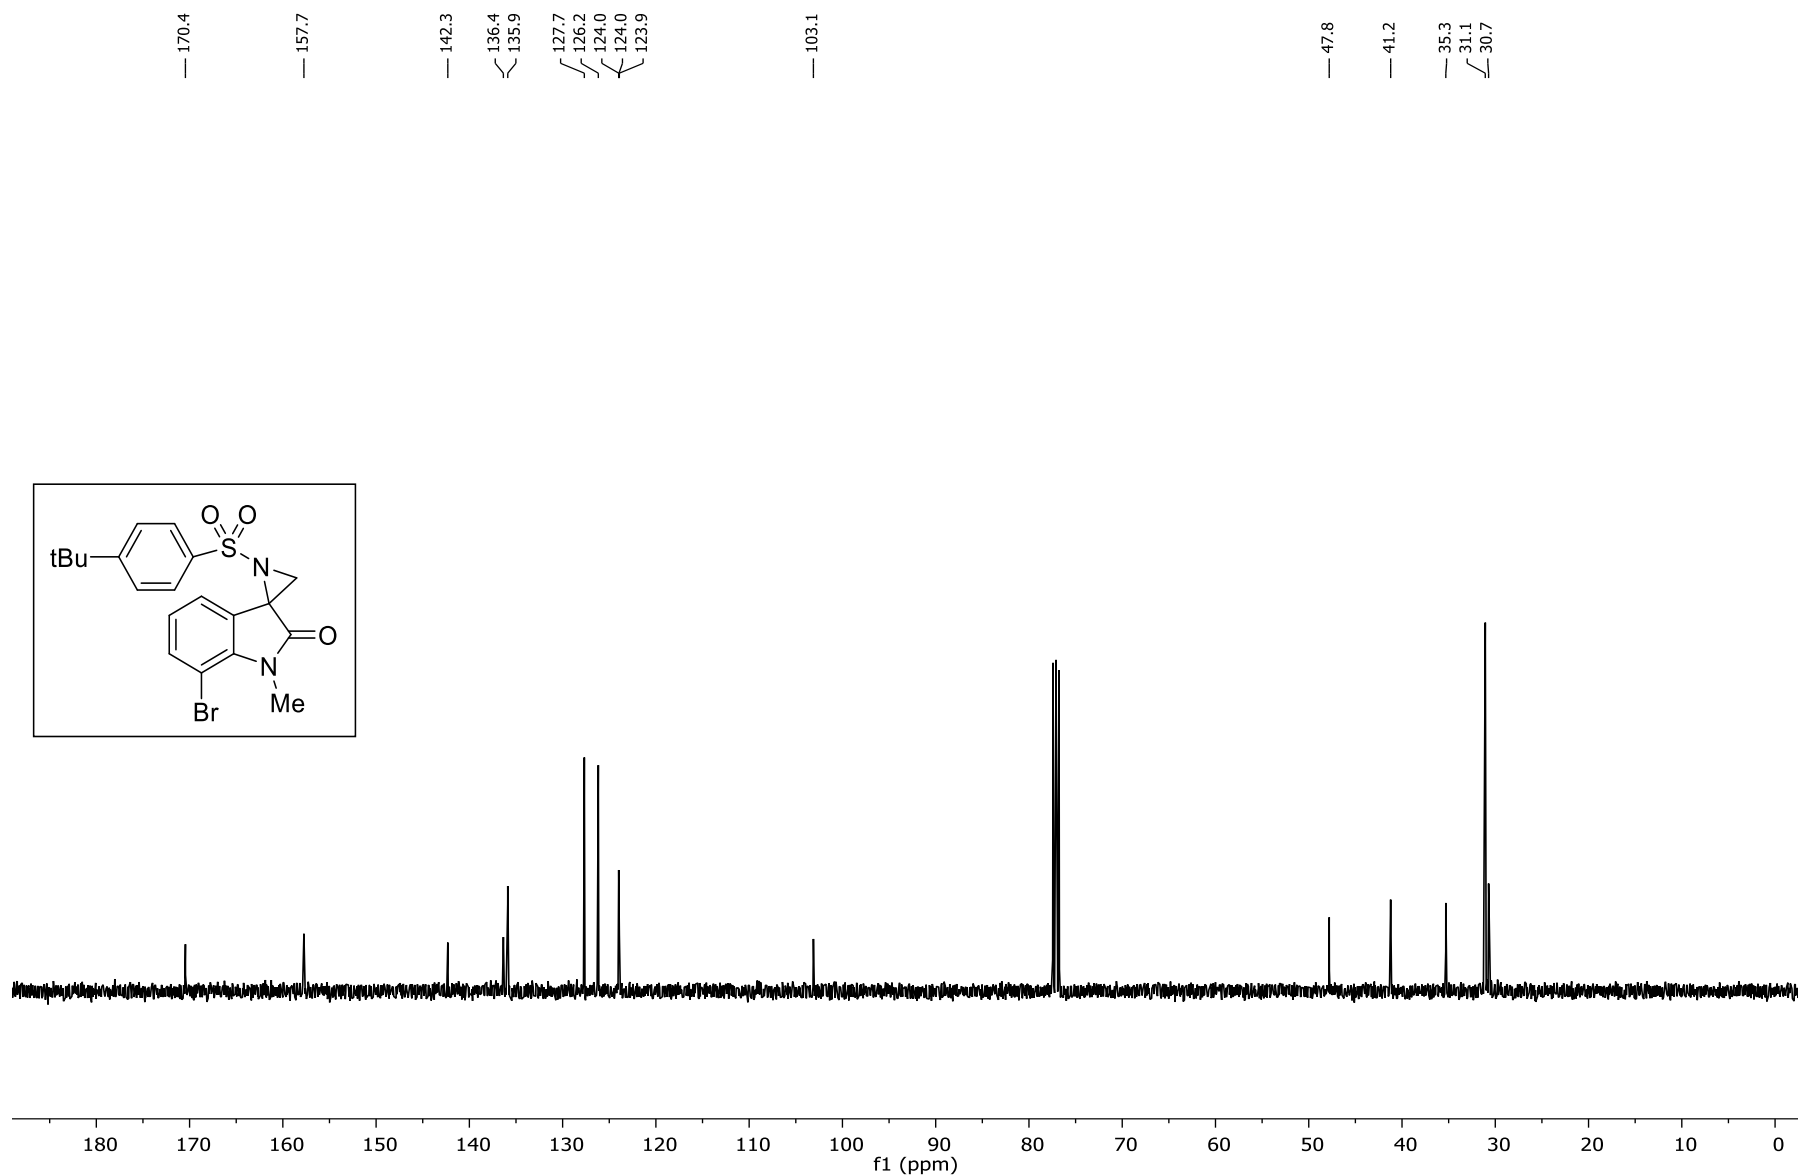

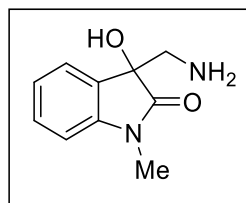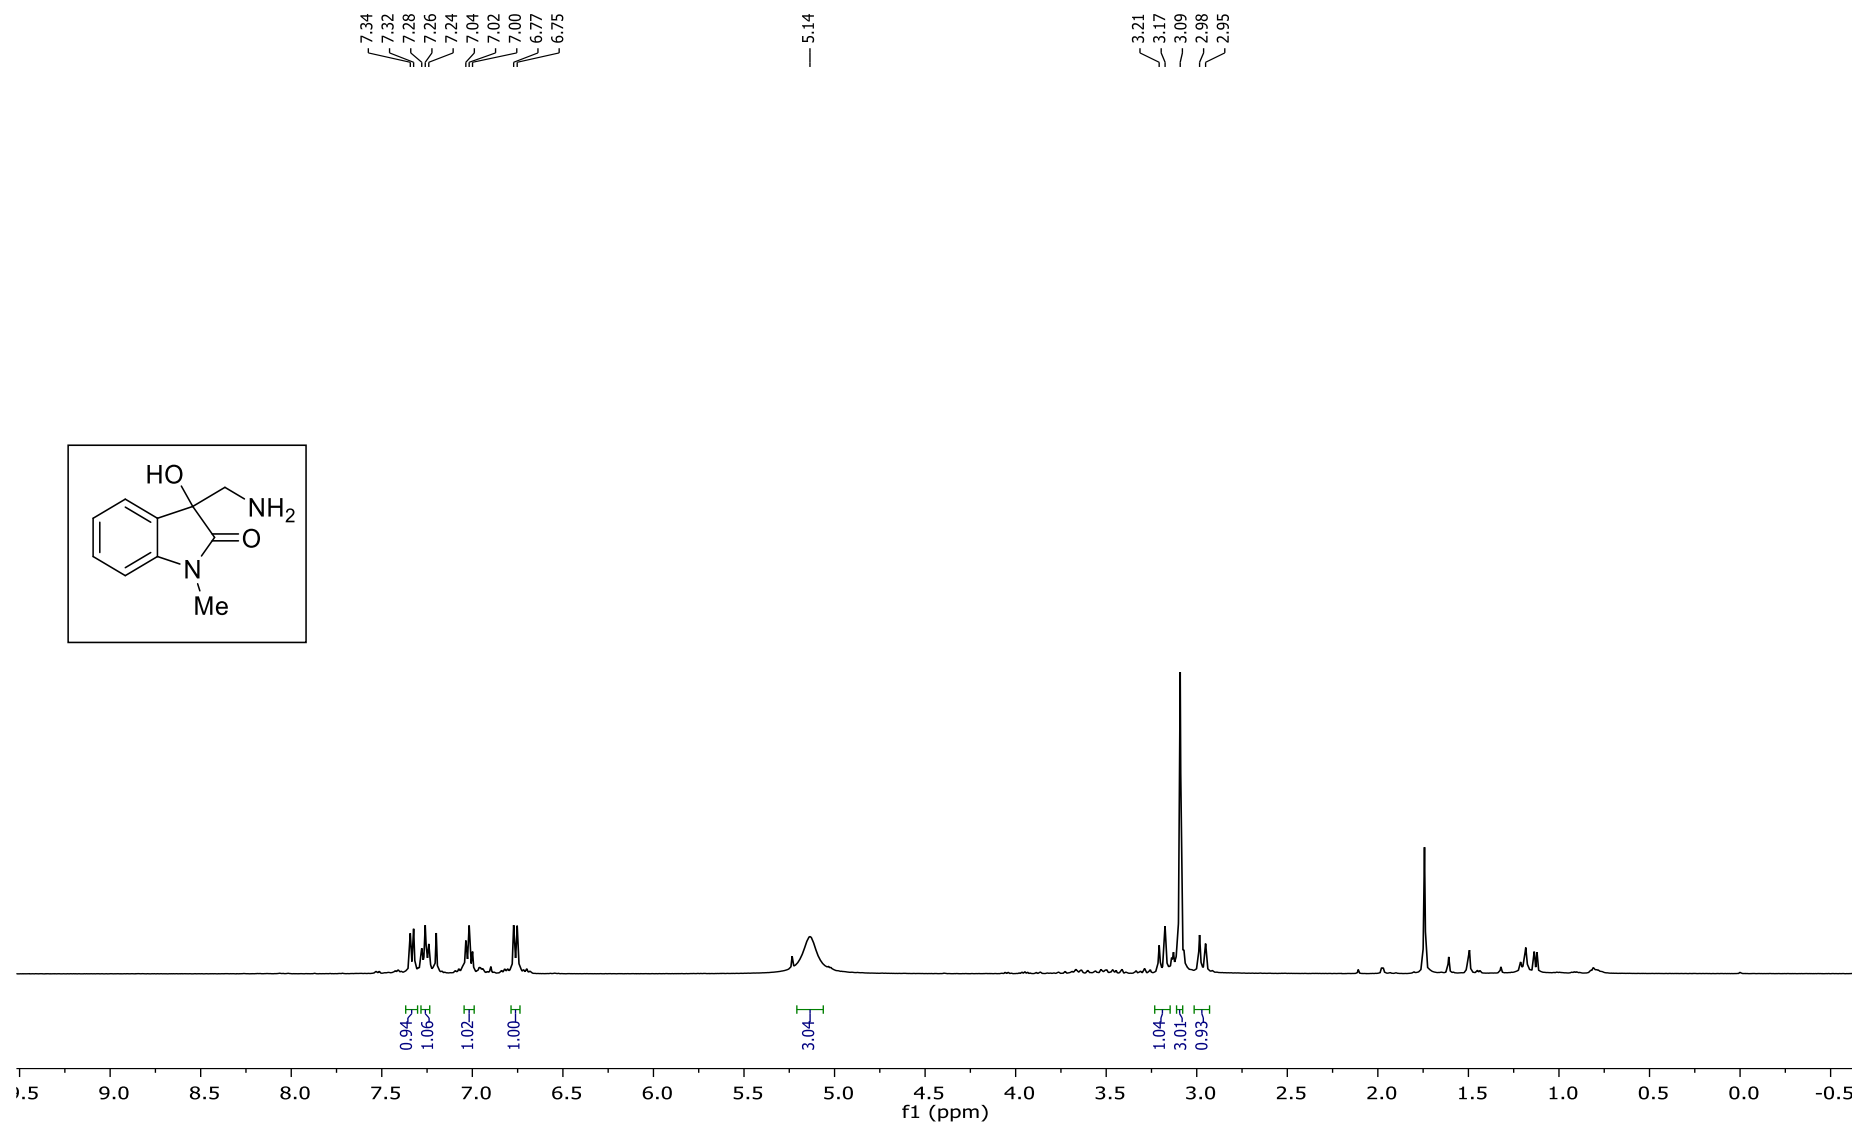

<sup>1</sup>H NMR spectrum of compound **5a** (400 MHz, CDCl<sub>3</sub>)



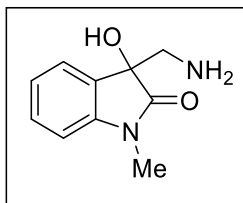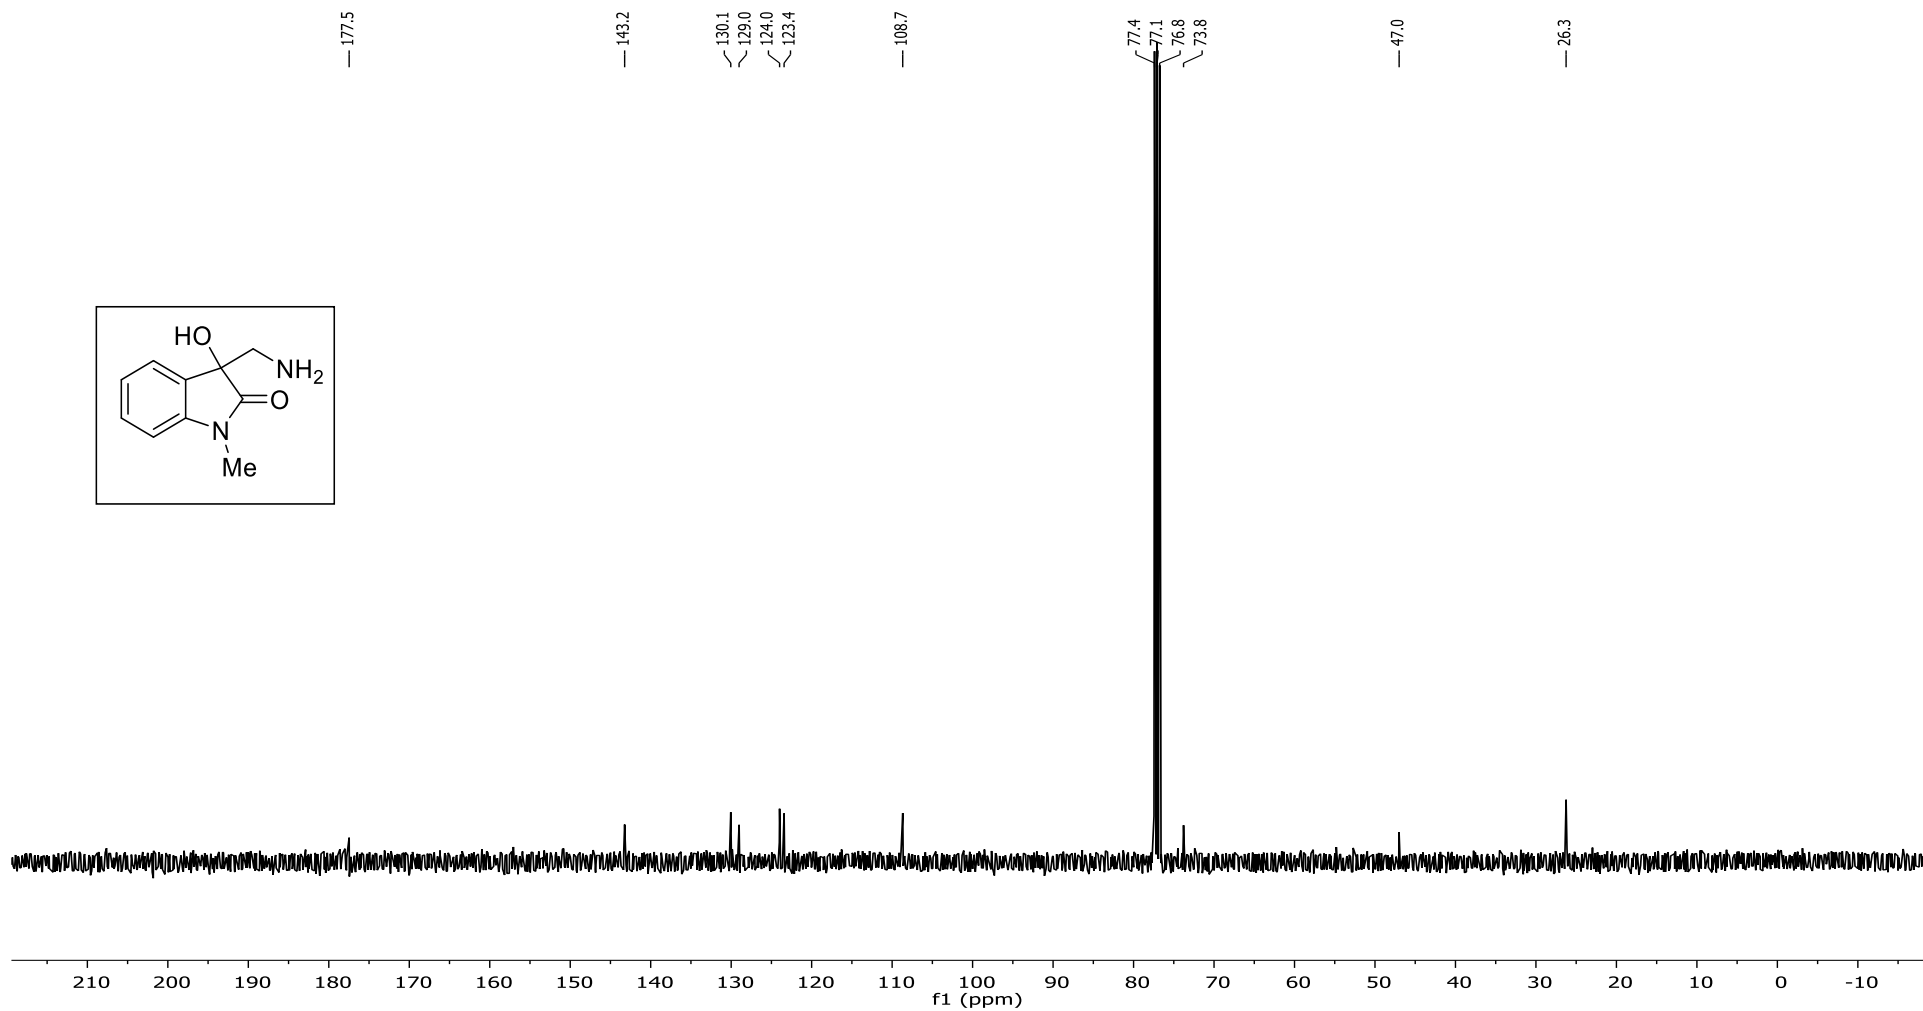

<sup>13</sup>C NMR spectrum of compound 5a (100 MHz, CDCl<sub>3</sub>)
